# Supplementary material for: Acid/base-controlled chemodivergent synthesis of two differently functionalized tetrahydroimidazo[1,2-a]pyridines
Source: Royal Society of Chemistry journal article supplement (doi:10.1039/c5ra13395e), 2015-01-01

## Supporting Information

### Acid/base-controlled chemodivergent synthesis of two differently functionalized tetrahydroimidazo[1,2-*a*]pyridines

Wei-Si Guo, Xing Xin, Ke-Long Zhao, Li-Rong Wen,\* and Ming Li\*

State Key Laboratory Base of Eco-Chemical Engineering, College of Chemistry and Molecular Engineering, Qingdao University of Science and Technology, Qingdao 266042, P. R. China.

*E-mail:* liming928@qust.edu.cn, wenlirong@qust.edu.cn

### Table of Contents

|                                                                                             |     |
|---------------------------------------------------------------------------------------------|-----|
| General methods.....                                                                        | S2  |
| General procedure for the preparation of compounds <b>5</b> and <b>6</b> .....              | S2  |
| X-ray structures of <b>4a</b> , <b>5c</b> and <b>6h</b> .....                               | S3  |
| Characterization of compounds <b>5</b> and <b>6</b> .....                                   | S5  |
| <sup>1</sup> H NMR and <sup>13</sup> C NMR spectra of compounds <b>5</b> and <b>6</b> ..... | S22 |

## General methods

All reagents and solvents were obtained from commercial suppliers and used without further purification. All reagents were weighed and handled in air at room temperature. Chromatography refers to open column chromatography on silica gel (100-200 mesh). Melting points were recorded on a RY-1 microscopic melting apparatus and uncorrected.  $^1\text{H}$  NMR spectra were recorded on 500 MHz and  $^{13}\text{C}$  NMR spectra were recorded on 125 MHz by using a Bruker Avance 500 spectrometer. Chemical shifts are reported in  $\delta$  (ppm) relative to tetramethylsilane (TMS). IR spectra were recorded on a Nicolet iS10 FT-IR spectrometer and only major peaks are reported in  $\text{cm}^{-1}$ . Mass spectra were performed on an Ultima Global spectrometer with an ESI source. The X-ray single-crystal diffraction was performed on Saturn 724+ instrument. The starting materials KTAs **1**<sup>1</sup> and HKAs **3**<sup>2</sup> were synthesized according to the literatures.

## General experimental procedures of compounds 5 (5a for example)

A solution of **1a** (0.5 mmol), **2a** (0.5 mmol) and **3a** (0.5 mmol) in  $\text{CH}_3\text{OH}$  (2 mL) was heated to refluxing for 8 h. After completion of the reaction as indicated by TLC, the precipitate was filtered and washed with  $\text{CH}_3\text{OH}$  to give the intermediate **4a**. Then **4a** was dissolved in DMF (2 mL), and  $\text{Na}_2\text{CO}_3$  (1.0 mmol) was added. The mixture was stirred at 100 °C for 2 h, quenched with saturated  $\text{NH}_4\text{Cl}$  and extracted with EtOAc (3  $\times$  10 mL). The combined organic phase was concentrated under vacuum, and the residue was purified by flash column chromatography (petroleum ether/EtOAc, 2: 1, v/v) to afford the products **5a**.

## General experimental procedures of compounds 6 (6a for example)

A solution of **1a** (0.5 mmol), **2a** (0.5 mmol) and **3a** (0.5 mmol) in  $\text{CH}_3\text{OH}$  (2 mL) was heated to refluxing for 8 h. Then 20%  $\text{H}_2\text{SO}_4$  (0.2 eq) was added and the mixture was heated to refluxing for additional 2 h. Water was added to the mixture and the precipitate was filtered, washed with petroleum ether/EtOAc (5: 1) and dried to afford the products **6a**.

## Reference:

1. (a) X. Feng, J. J. Wang, Z. Xun, Z. B. Huang and D. Q. Shi, *J. Org. Chem.*, **2015**, *80*, 1025; (b) R. Gomper and H. Schaefer, *Chem. Ber.*, **1967**, *100*, 591.
2. (a) X. Chen, L. Zhu, L. Fang, S. Yan and J. Lin, *RSC Adv.*, **2014**, *4*, 9926; (b) Z. J. Li and D. Charles, *Synth. Commun.*, **2001**, *31*, 527; (c) Z. T. Huang and M. X. Wang, *Synthesis*, **1992**, *12*, 1273.

**7-(4-Chlorophenyl)-8-(2,5-dichlorobenzoyl)-5-hydroxy-*N*,5-diphenyl-1,2,3,5,6,7-hexahydroimidazo[1,2-*a*]pyridine-6-carbothioamide (4a)**  
(CCDC 858868)

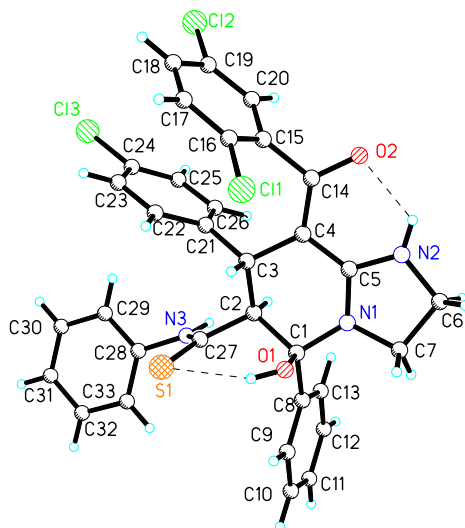

**Figure S1.** X-Ray Structure of **4a**

**(6-Benzoyl-7-(4-methoxyphenyl)-5-(phenylamino)-1,2,3,7-tetrahydroimidazo[1,2-*a*]pyridin-8-yl)(2,5-dichlorophenyl)methanone (5c)**  
(CCDC 878006)

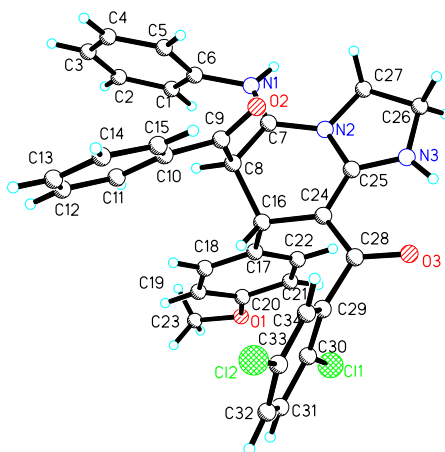

**Figure S2.** X-Ray Structure of **5c**

**7-(3-Chlorophenyl)-8-(2,5-dichlorobenzoyl)-N,5-diphenyl-1,2,3,7-tetrahydroimidazo[1,2-*a*]pyridine-6-carbothioamide (6h)**

(CCDC 1003512)

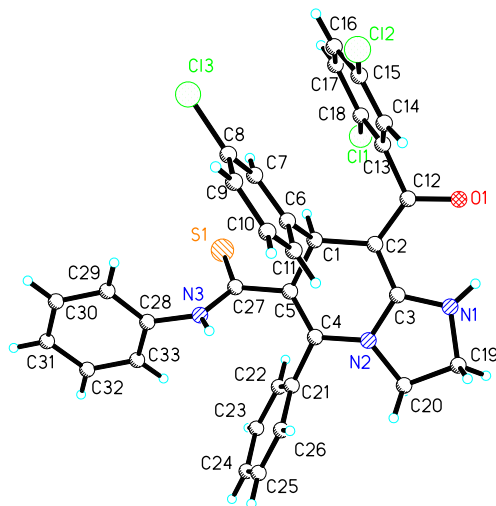

**Figure S3.** X-Ray Structure of **6h**

**(6-Benzoyl-7-phenyl-5-(phenylamino)-1,2,3,7-tetrahydroimidazo[1,2-*a*]pyridin-8-yl)(2,5-dichlorophenyl)methanone (5a)**

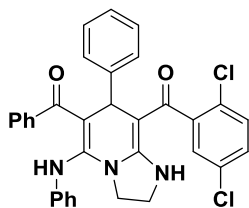

Light yellow powder; mp 235–237 °C; IR (KBr)  $\nu$  3442, 1683, 1629, 1595, 1534, 1498, 1486, 1458, 760, 699  $\text{cm}^{-1}$ ;  $^1\text{H}$  NMR (DMSO- $d_6$ , 500 MHz)  $\delta$  3.58–3.85 (m, 1H, NH), 3.94–3.95 (m, 2H, CH<sub>2</sub>), 4.13–4.14 (m, 2H, CH<sub>2</sub>), 4.49 (s, 1H, CH), 6.05–6.25 (m, 3H, ArH), 6.89–7.64 (m, 15H, ArH), 9.49 (s, 1H, NH);  $^{13}\text{C}$  NMR (DMSO- $d_6$ , 125 MHz)  $\delta$  42.7, 43.4, 44.4, 60.2 (2C), 120.3 (4C), 123.7 (2C), 126.7 (2C), 127.5 (2C), 128.2 (2C), 129.2 (2C), 129.5 (4C), 131.4 (2C), 134.3 (2C), 148.5 (2C), 149.9, 157.2, 184.4 (2C); HRMS (ESI-TOF, [M + H]<sup>+</sup>) calcd for C<sub>33</sub>H<sub>26</sub>N<sub>3</sub>O<sub>2</sub>Cl<sub>2</sub>, 566.1402; found 566.1415.

**(6-Benzoyl-5-(phenylamino)-7-(*p*-tolyl)-1,2,3,7-tetrahydroimidazo[1,2-*a*]pyridin-8-yl)(2,5-dichlorophenyl)methanone (5b)**

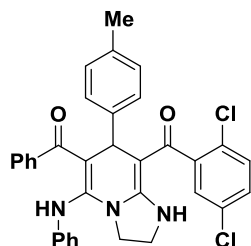

Light yellow powder; mp 219–220 °C; IR (KBr)  $\nu$  3441, 1678, 1629, 1595, 1527, 1496, 1486, 1456, 817, 755, 700  $\text{cm}^{-1}$ ;  $^1\text{H}$  NMR (CDCl<sub>3</sub>, 500 MHz)  $\delta$  2.32 (s, 3H, CH<sub>3</sub>), 3.57–3.90 (m, 1H, NH), 4.00–4.12 (m, 2H, CH<sub>2</sub>), 4.27–4.40 (m, 2H, CH<sub>2</sub>), 4.58 (s, 1H, CH), 6.32–7.04 (m, 12H, ArH), 7.35–7.53 (m, 5H, ArH), 9.53 (s, 1H, NH);  $^{13}\text{C}$  NMR (CDCl<sub>3</sub>, 125 MHz)  $\delta$  21.0, 42.0, 42.9, 44.4, 51.8 (2C), 120.4 (4C), 123.4 (2C), 126.2 (2C), 128.1 (2C), 128.9 (2C), 129.0 (4C), 129.4 (2C), 131.8 (2C), 134.4 (2C), 136.8 (2C), 148.1, 150.0, 186.4 (2C); HRMS (ESI-TOF, [M + H]<sup>+</sup>) calcd for C<sub>34</sub>H<sub>28</sub>N<sub>3</sub>O<sub>2</sub>Cl<sub>2</sub>, 580.1559; found 580.1562.

**(6-Benzoyl-7-(4-methoxyphenyl)-5-(phenylamino)-1,2,3,7-tetrahydroimidazo[1,2-*a*]pyridin-8-yl)(2,5-dichlorophenyl)methanone (5c)**

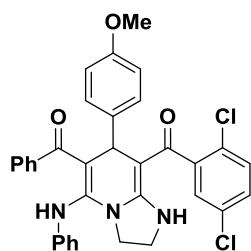

Light yellow powder; mp 203–205 °C; IR (KBr)  $\nu$  3439, 1685, 1628, 1595, 1530, 1500, 1485, 1457, 826, 754, 691  $\text{cm}^{-1}$ ;  $^1\text{H}$  NMR ( $\text{CDCl}_3$ , 500 MHz)  $\delta$  3.55–3.88 (m, 4H,  $\text{OCH}_3 + \text{NH}$ ), 4.02–4.11 (m, 2H,  $\text{CH}_2$ ), 4.27–4.40 (m, 2H,  $\text{CH}_2$ ), 4.56 (s, 1H, CH), 6.32–6.35 (m, 3H, ArH), 6.71–7.06 (m, 9H, ArH), 7.34–7.55 (m, 5H, ArH), 9.52 (s, 1H, NH);  $^{13}\text{C}$  NMR ( $\text{CDCl}_3$ , 125 MHz)  $\delta$  41.8, 43.0, 44.5, 55.4, 114.2 (2C), 120.5 (4C), 123.5 (2C), 127.5 (4C), 128.2 (2C), 128.9 (2C), 129.1 (4C), 131.9 (2C), 134.6 (2C), 148.2 (2C), 150.1, 158.7, 186.6 (2C); HRMS (ESI-TOF,  $[\text{M} + \text{H}]^+$ ) calcd for  $\text{C}_{34}\text{H}_{28}\text{N}_3\text{O}_3\text{Cl}_2$ , 596.3033; found 596.3040.

**(6-Benzoyl-7-(4-fluorophenyl)-5-(phenylamino)-1,2,3,7-tetrahydroimidazo[1,2-a]pyridin-8-yl)(2,5-dichlorophenyl)methanone (5d)**

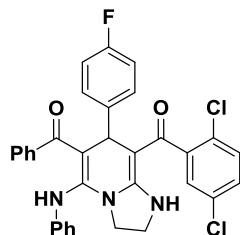

Light yellow powder; mp 206–208 °C; IR (KBr)  $\nu$  3445, 1683, 1630, 1596, 1526, 1505, 1487, 1457, 760, 696  $\text{cm}^{-1}$ ;  $^1\text{H}$  NMR ( $\text{CDCl}_3$ , 500 MHz)  $\delta$  3.59–3.89 (m, 1H, NH), 4.00–4.12 (m, 2H,  $\text{CH}_2$ ), 4.29–4.40 (m, 2H,  $\text{CH}_2$ ), 4.52 (s, 1H, CH), 6.15–6.48 (m, 3H, ArH), 6.78–7.07 (m, 9H, ArH), 7.36–7.54 (m, 5H, ArH), 9.52 (s, 1H, NH);  $^{13}\text{C}$  NMR ( $\text{CDCl}_3$ , 125 MHz)  $\delta$  41.9, 43.0, 44.5, 115.7 ( $^2J_{\text{C-F}} = 241.9$  Hz) (2C), 120.3 (4C), 123.6 (2C), 128.0 (3C), 129.1 (4C), 129.2 (4C), 132.0 (2C), 134.5 (2C), 141.1 (2C), 148.1, 149.8, 161.9 ( $^1J_{\text{C-F}} = 246.2$  Hz), 186.5 (2C); HRMS (ESI-TOF,  $[\text{M} + \text{H}]^+$ ) calcd for  $\text{C}_{33}\text{H}_{25}\text{N}_3\text{O}_2\text{Cl}_2\text{F}$ , 584.1308, found 584.1315.

**(6-Benzoyl-7-(4-chlorophenyl)-5-(phenylamino)-1,2,3,7-tetrahydroimidazo[1,2-a]pyridin-8-yl)(2,5-dichlorophenyl)methanone (5e)**

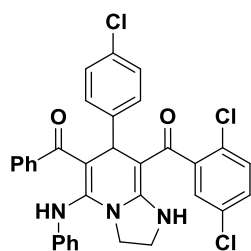

Light yellow powder; mp 216–218 °C; IR (KBr)  $\nu$  3442, 1681, 1630, 1595, 1532, 1498, 1488, 1457, 841, 764, 701  $\text{cm}^{-1}$ ;  $^1\text{H}$  NMR ( $\text{CDCl}_3$ , 500 MHz)  $\delta$  3.57–3.88 (m, 1H, NH), 4.01–4.13 (m, 2H,  $\text{CH}_2$ ), 4.28–4.40 (m, 2H,  $\text{CH}_2$ ), 4.52 (s, 1H, CH), 6.32–6.35 (m, 3H, ArH), 6.72–7.22 (m, 9H, ArH), 7.35–7.54 (m, 5H, ArH), 9.53 (s, 1H, NH);  $^{13}\text{C}$  NMR ( $\text{CDCl}_3$ , 125 MHz)  $\delta$  41.8, 43.0, 44.4, 120.2 (4C), 123.6 (2C), 127.8 (4C), 129.1 (4C), 129.1 (4C), 131.0 (2C), 132.0 (2C), 133.0 (2C), 134.3 (2C), 147.9, 149.6, 186.4 (2C); HRMS (ESI-TOF,  $[\text{M} + \text{H}]^+$ ) calcd for  $\text{C}_{33}\text{H}_{25}\text{N}_3\text{O}_2\text{Cl}_3$ , 600.1012, found 600.1025.

**(6-Benzoyl-7-(4-bromophenyl)-5-(phenylamino)-1,2,3,7-tetrahydroimidazo[1,2-a]pyridin-8-yl)(2,5-dichlorophenyl)methanone (5f)**

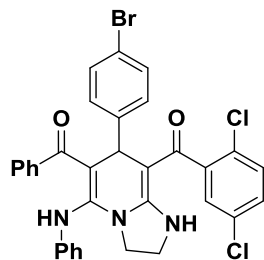

Light yellow powder; mp 222–224 °C; IR (KBr)  $\nu$  3445, 1683, 1633, 1595, 1525, 1497, 1486, 1457, 764, 700  $\text{cm}^{-1}$ ;  $^1\text{H}$  NMR ( $\text{CDCl}_3$ , 500 MHz)  $\delta$  3.56–3.86 (m, 1H, NH), 4.01–4.11 (m, 2H,  $\text{CH}_2$ ), 4.28–4.40 (m, 2H,  $\text{CH}_2$ ), 4.52 (s, 1H, CH), 6.32–6.35 (m, 3H, ArH), 6.66–6.73 (m, 2H, ArH), 6.98–7.13 (m, 5H, ArH), 7.37–7.54 (m, 7H, ArH), 9.52 (s, 1H, NH);  $^{13}\text{C}$  NMR ( $\text{CDCl}_3$ , 125 MHz)  $\delta$  42.0, 43.0, 44.5, 120.3 (4C), 121.1 (2C), 123.7 (2C), 128.2 (4C), 129.1 (4C), 129.2 (4C), 131.9 (4C), 134.4 (2C), 148.0, 149.7, 186.5 (2C); HRMS (ESI-TOF,  $[\text{M} + \text{H}]^+$ ) calcd for  $\text{C}_{33}\text{H}_{25}\text{N}_3\text{O}_2\text{Cl}_2\text{Br}$ , 644.0507, found 644.0518.

**(6-Benzoyl-7-(4-nitrophenyl)-5-(phenylamino)-1,2,3,7-tetrahydroimidazo[1,2-a]pyridin-8-yl)(2,5-dichlorophenyl)methanone (5g)**

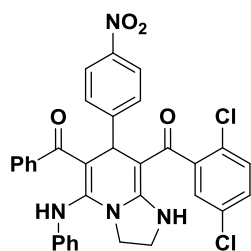

Light yellow powder; mp 243–245 °C; IR (KBr)  $\nu$  3443, 1684, 1633, 1596, 1522, 1497, 1488, 1457, 837, 767, 697  $\text{cm}^{-1}$ ;  $^1\text{H}$  NMR ( $\text{CDCl}_3$ , 500 MHz)  $\delta$  3.72–3.98 (m, 1H, NH), 4.04–4.14 (m, 2H,  $\text{CH}_2$ ), 4.32–4.42 (m, 2H,  $\text{CH}_2$ ), 4.52 (s, 1H, CH), 6.33 (s, 3H, ArH), 6.95–7.08 (m, 7H, ArH), 7.47–7.62 (m, 5H, ArH), 8.12 (s, 2H, ArH), 9.55 (s, 1H, NH);  $^{13}\text{C}$  NMR ( $\text{CDCl}_3$ , 125 MHz)  $\delta$  42.3, 43.0, 44.5, 120.1 (3C), 123.8 (2C), 124.1 (2C), 127.6 (4C), 129.2 (4C), 132.2 (2C), 134.1 (2C), 147.0 (2C), 147.7 (2C); HRMS (ESI-TOF,  $[\text{M} + \text{H}]^+$ ) calcd for  $\text{C}_{33}\text{H}_{25}\text{N}_4\text{O}_4\text{Cl}_2$ , 611.1253; found 611.1269.

**(6-Benzoyl-7-(2-methoxyphenyl)-5-(phenylamino)-1,2,3,7-tetrahydroimidazo[1,2-*a*]pyridin-8-yl)(2,5-dichlorophenyl)methanone (5h)**

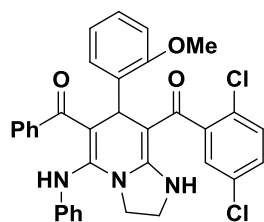

Light yellow powder; mp 264–266 °C; IR (KBr)  $\nu$  3282, 1681, 1629, 1596, 1545, 1494, 1485, 1458, 764, 695  $\text{cm}^{-1}$ ;  $^1\text{H}$  NMR ( $\text{CDCl}_3$ , 500 MHz)  $\delta$  3.53 (s, 3H,  $\text{OCH}_3$ ), 4.00–4.37 (m, 5H,  $\text{CH}_2 + \text{NH}$ ), 4.70 (s, 1H, CH), 6.22 (d,  $J = 7.60$  Hz, 3H, ArH), 6.79–7.25 (m, 9H, ArH), 7.37–7.73 (m, 5H, ArH), 9.48 (s, 1H, NH);  $^{13}\text{C}$  NMR ( $\text{CDCl}_3$ , 125 MHz)  $\delta$  43.1, 44.2, 50.1, 54.8, 110.3 (2C), 120.3 (3C), 120.9 (2C), 123.3 (2C), 126.9 (2C), 128.4 (2C), 128.6 (2C), 128.8 (3C), 131.6 (2C), 134.6 (2C), 141.0 (2C), 148.2 (2C), 150.8, 155.9, 186.2 (2C); HRMS (ESI-TOF,  $[\text{M} + \text{H}]^+$ ) calcd for  $\text{C}_{34}\text{H}_{28}\text{N}_3\text{O}_3\text{Cl}_2$ , 596.1508; found 596.1515.

**(6-Benzoyl-7-(3-methoxyphenyl)-5-(phenylamino)-1,2,3,7-tetrahydroimidazo[1,2-*a*]pyridin-8-yl)(2,5-dichlorophenyl)methanone (5i)**

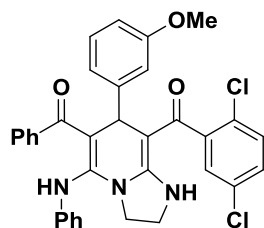

Light yellow powder; mp 218–220 °C; IR (KBr)  $\nu$  3327, 1683, 1624, 1597, 1529, 1495, 1486, 1456, 777, 751, 695  $\text{cm}^{-1}$ ;  $^1\text{H}$  NMR ( $\text{CDCl}_3$ , 500 MHz)  $\delta$  3.58–3.92 (m,



4H, OCH<sub>3</sub> + NH), 4.01–4.16(m, 2H, CH<sub>2</sub>), 4.28–4.41 (m, 2H, CH<sub>2</sub>), 4.59 (s, 1H, CH), 6.25–6.50 (m, 5H, ArH), 6.78–7.20 (m, 7H, ArH), 7.36–7.55 (m, 5H, ArH), 9.54 (s, 1H, NH); <sup>13</sup>C NMR (CDCl<sub>3</sub>, 125 MHz) δ 42.4, 42.9, 44.4, 55.2, 111.8 (2C), 113.0 (2C), 118.7 (2C), 120.4 (3C), 123.4 (2C), 128.1 (3C), 128.9 (3C), 129.0 (3C), 129.8 (2C), 131.9 (2C), 134.5 (2C), 148.1, 149.8, 186.4 (2C); HRMS (ESI-TOF, [M + H]<sup>+</sup>) calcd for C<sub>34</sub>H<sub>28</sub>N<sub>3</sub>O<sub>3</sub>Cl<sub>2</sub>, 596.1508; found 596.1519.

**(6-Benzoyl-7-(4-chlorophenyl)-5-(phenylamino)-1,2,3,7-tetrahydroimidazo[1,2-a]pyridin-8-yl)(2-fluorophenyl)methanone (5j)**

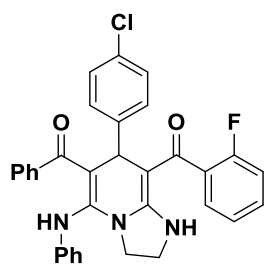

Yellow powder; mp 224–225 °C; IR (KBr)  $\nu$  3296, 1681, 1637, 1621, 1594, 1511, 1493, 1457, 780, 760, cm<sup>-1</sup>; <sup>1</sup>H NMR (CDCl<sub>3</sub>, 500 MHz) δ 3.89 (s, 1H, NH), 3.97–4.38 (m, 4H, CH<sub>2</sub>), 4.53–4.56 (m, 1H, CH), 6.37–6.45 (m, 3H, ArH), 6.64–6.79 (m, 4H, ArH), 6.94–7.21 (m, 6H, ArH), 7.36–7.57 (m, 5H, ArH), 9.53 (s, 1H, NH); <sup>13</sup>C NMR (CDCl<sub>3</sub>, 125 MHz) δ 41.7, 42.9, 44.4, 51.9, 85.8, 115.5 (<sup>2</sup>J<sub>C-F</sub> = 21.6 Hz) (2C), 120.3 (2C), 120.7, 123.4, 123.6, 127.8 (2C), 128.1 (2C), 128.9 (3C), 129.1 (2C), 129.8 (<sup>3</sup>J<sub>C-F</sub> = 7.1 Hz) (2C), 132.8, 133.4, 134.7, 138.1, 141.0, 149.9, 157.7, 158.0 (<sup>1</sup>J<sub>C-F</sub> = 241.9 Hz), 186.4, 195.4; HRMS (ESI-TOF, [M + H]<sup>+</sup>) calcd for C<sub>33</sub>H<sub>26</sub>N<sub>3</sub>O<sub>2</sub>ClF, 550.1698, found 550.1685.

**(6-Benzoyl-7-(4-chlorophenyl)-5-(phenylamino)-1,2,3,7-tetrahydroimidazo[1,2-a]pyridin-8-yl)(2-chlorophenyl)methanone (5k)**

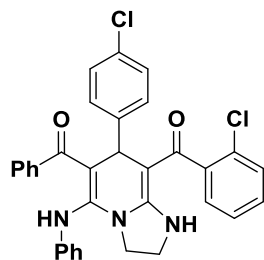

Light yellow powder; mp 194–196 °C; IR (KBr)  $\nu$  3442, 1682, 1629, 1594, 1526, 1496, 1488, 1456, 816, 758, 738, 700 cm<sup>-1</sup>; <sup>1</sup>H NMR (CDCl<sub>3</sub>, 500 MHz) δ 3.67–3.90 (m, 1H, NH), 4.00–4.13 (m, 2H, CH<sub>2</sub>), 4.25–4.39 (m, 2H, CH<sub>2</sub>), 4.51 (s, 1H, CH), 6.20–6.50 (m, 3H, ArH), 6.59–7.20 (m, 10H, ArH), 7.43–7.55 (m, 5H, ArH), 9.56 (s, 1H, NH); <sup>13</sup>C NMR (CDCl<sub>3</sub>, 125 MHz) δ 41.9, 43.0, 44.4, 51.9, 85.5, 120.3 (3C),

123.5 (2C), 127.9 (3C), 128.2 (3C), 128.8 (3C), 129.0 (2C), 129.1 (4C), 132.8, 133.5, 134.6, 148.1, 149.8, 157.8, 188.4 (2C); HRMS (ESI-TOF,  $[M + H]^+$ ) calcd for  $C_{33}H_{26}N_3O_2Cl_2$ , 566.1402; found 566.1410.

**(6-Benzoyl-7-(4-chlorophenyl)-5-(phenylamino)-1,2,3,7-tetrahydroimidazo[1,2-*a*]pyridin-8-yl)(2-bromophenyl)methanone (5l)**

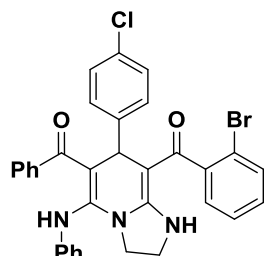

Yellow powder; mp 190–192 °C; IR (KBr)  $\nu$  3245, 1680, 1653, 1627, 1594, 1528, 1485, 1455, 816, 756, 692  $cm^{-1}$ ;  $^1H$  NMR ( $CDCl_3$ , 500 MHz)  $\delta$  3.64–3.89 (m, 1H, NH), 4.00–4.50 (m, 4H,  $CH_2$ ), 4.50 (s, 1H, CH), 6.23–6.37 (m, 3H, ArH), 6.63–7.25 (m, 10H, ArH), 7.34–7.56 (m, 5H, ArH), 9.57 (s, 1H, NH);  $^{13}C$  NMR ( $CDCl_3$ , 125 MHz)  $\delta$  42.0, 43.0, 44.5, 120.3 (3C), 123.6 (2C), 126.6 (2C), 127.6 (2C), 128.0 (2C), 128.4 (2C), 128.9 (2C), 129.1 (3C), 132.1 (2C), 133.6 (2C), 134.5 (2C), 148.0 (2C), 149.8, 157.9, 189.2 (2C); HRMS (ESI-TOF,  $[M + H]^+$ ) calcd for  $C_{33}H_{26}N_3O_2ClBr$ , 610.0897, found 610.0885.

**(6-Benzoyl-7-(4-chlorophenyl)-5-(phenylamino)-1,2,3,7-tetrahydroimidazo[1,2-*a*]pyridin-8-yl)(*o*-tolyl)methanone (5m)**

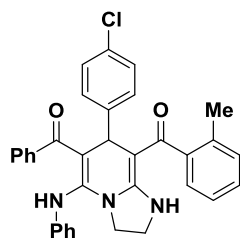

Yellow powder; mp 170–172 °C; IR (KBr)  $\nu$  3306, 1683, 1629, 1595, 1524, 1487, 1456, 779, 695,  $cm^{-1}$ ;  $^1H$  NMR ( $CDCl_3$ , 500 MHz)  $\delta$  1.72 (s, 3H,  $CH_3$ ), 3.79 (s, 1H, NH), 3.99–4.11 (m, 2H,  $CH_2$ ), 4.23–4.39 (m, 2H,  $CH_2$ ), 4.46 (s, 1H, CH), 6.22–6.35 (m, 3H, ArH), 6.60–7.19 (m, 10H, ArH), 7.38–7.57 (m, 5H, ArH), 9.58 (s, 1H, NH);  $^{13}C$  NMR ( $CDCl_3$ , 125 MHz)  $\delta$  18.4, 42.2, 42.9, 44.4, 51.9, 85.7, 120.4 (2C), 123.5, 124.6, 125.1, 127.7 (2C), 127.9 (2C), 128.1 (2C), 128.8 (2C), 128.9 (2C), 129.1 (2C), 130.0, 132.7, 133.5, 134.4, 140.5, 142.0, 148.1, 149.9, 157.4, 192.6, 195.2; HRMS (ESI-TOF,  $[M + H]^+$ ) calcd for  $C_{34}H_{29}N_3O_2Cl$ , 546.1948, found 546.1936.

**(6-Benzoyl-7-(4-chlorophenyl)-5-(phenylamino)-1,2,3,7-tetrahydroimidazo[1,2-*a*]pyridin-8-yl)(2,4-dichlorophenyl)methanone (5n)**

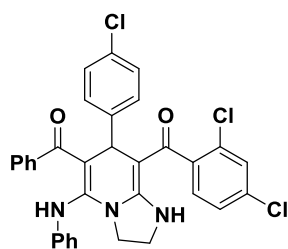

Light yellow powder; mp 218–220 °C; IR (KBr)  $\nu$  3308, 1684, 1625, 1595, 1531, 1498, 1487, 1454, 824, 776, 764, 702  $\text{cm}^{-1}$ ;  $^1\text{H}$  NMR ( $\text{CDCl}_3$ , 500 MHz)  $\delta$  3.65–3.85 (m, 1H, NH), 3.99–4.10 (m, 2H,  $\text{CH}_2$ ), 4.23–4.38 (m, 2H,  $\text{CH}_2$ ), 4.53 (s, 1H, CH), 6.10–6.40 (m, 3H, ArH), 6.78–7.23 (m, 9H, ArH), 7.39–7.67 (m, 5H, ArH), 9.55 (s, 1H, NH);  $^{13}\text{C}$  NMR ( $\text{CDCl}_3$ , 125 MHz)  $\delta$  41.8, 43.0, 44.4, 120.2 (3C), 123.6 (2C), 127.8 (3C), 128.2 (3C), 128.9 (2C), 129.1 (3C), 133.0 (2C), 133.7 (2C), 134.1 (2C), 134.4 (2C), 147.9 (2C), 149.6, 158.0, 187.0 (2C); HRMS (ESI-TOF,  $[\text{M} + \text{H}]^+$ ) calcd for  $\text{C}_{33}\text{H}_{25}\text{N}_3\text{O}_2\text{Cl}_3$ , 600.1012; found 600.1009.

**(6-Benzoyl-7-(4-chlorophenyl)-5-(phenylamino)-1,2,3,7-tetrahydroimidazo[1,2-*a*]pyridin-8-yl)(2,4-dichloro-5-fluorophenyl)methanone (5o)**

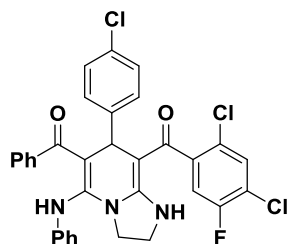

Light yellow powder; mp 250–252 °C; IR (KBr)  $\nu$  3282, 1683, 1628, 1594, 1542, 1500, 1488, 1459, 849, 781, 694  $\text{cm}^{-1}$ ;  $^1\text{H}$  NMR ( $\text{DMSO-}d_6$ , 500 MHz)  $\delta$  3.62–3.79 (m, 1H, NH), 3.91–4.12 (m, 4H,  $\text{CH}_2$ ), 4.46 (s, 1H, CH), 5.92–6.30 (m, 3H, ArH), 6.91–7.08 (m, 5H, ArH), 7.32–7.66 (m, 8H, ArH), 9.48 (s, 1H, NH);  $^{13}\text{C}$  NMR ( $\text{DMSO-}d_6$ , 125 MHz)  $\delta$  42.0, 43.5, 44.5, 120.0, 120.2 (4C), 123.7 (2C), 128.4 (4C), 128.8 (4C), 129.1 (2C), 129.5 (4C), 132.1, 134.1, 134.5, 148.4, 149.6, 155.7 ( $^1J_{\text{C-F}} = 249.1$  Hz), 157.2, 183.3 (2C); HRMS (ESI-TOF,  $[\text{M} + \text{H}]^+$ ) calcd for  $\text{C}_{33}\text{H}_{24}\text{N}_3\text{O}_2\text{Cl}_3\text{F}$ , 618.0918; found 618.0925.

**(6-Benzoyl-7-(4-chlorophenyl)-5-((4-(trifluoromethyl)phenyl)amino)-1,2,3,7-tetrahydroimidazo[1,2-*a*]pyridin-8-yl)(2,5-dichlorophenyl)methanone (5p)**

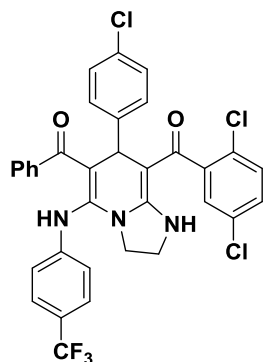

Light yellow powder; mp 204–206 °C; IR (KBr)  $\nu$  3440, 1683, 1630, 1612, 1533, 1492, 1457, 1324, 858, 778, 689  $\text{cm}^{-1}$ ;  $^1\text{H}$  NMR ( $\text{CDCl}_3$ , 500 MHz)  $\delta$  3.62–3.93 (m, 1H, NH), 4.02–4.12 (m, 2H,  $\text{CH}_2$ ), 4.26–4.40 (m, 2H,  $\text{CH}_2$ ), 5.20 (s, 1H, CH) 6.30–6.44 (m, 3H, ArH), 6.76–7.25 (m, 6H, ArH), 7.34–7.55 (m, 7H, ArH), 9.53 (s, 1H, NH);  $^{13}\text{C}$  NMR ( $\text{CDCl}_3$ , 125 MHz)  $\delta$  42.0, 43.0, 44.5, 120.6 (4C), 124.4 ( $^1J_{\text{C-F}} = 326.0$  Hz), 125.6 ( $^2J_{\text{C-F}} = 85.7$  Hz), 126.4 (4C), 127.8 (4C), 129.1 (3C), 129.2 (4C), 132.1 (2C), 133.2 (2C), 134.0 (2C), 149.9, 151.2, 186.7 (2C); HRMS (ESI-TOF,  $[\text{M} + \text{H}]^+$ ) calcd for  $\text{C}_{34}\text{H}_{24}\text{N}_3\text{O}_2\text{Cl}_3\text{F}_3$ , 668.0886; found 668.0895.

**(6-(4-Chlorobenzoyl)-7-(4-chlorophenyl)-5-(phenylamino)-1,2,3,7-tetrahydroimidazo[1,2-a]pyridin-8-yl)(2,5-dichlorophenyl)methanone (5q)**

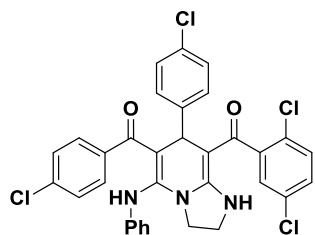

Light yellow powder; mp 224–226 °C; IR (KBr)  $\nu$  3442, 1683, 1629, 1590, 1527, 1498, 1487, 1457, 816, 781, 701  $\text{cm}^{-1}$ ;  $^1\text{H}$  NMR ( $\text{CDCl}_3$ , 500 MHz)  $\delta$  3.52–3.84 (m, 1H, NH), 4.01–4.11 (m, 2H,  $\text{CH}_2$ ), 4.27–4.39 (m, 2H,  $\text{CH}_2$ ), 4.46 (s, 1H, CH), 6.33 (s, 3H, ArH), 6.69–7.25 (m, 9H, ArH), 7.27–7.48 (m, 4H, ArH), 9.52 (s, 1H, NH);  $^{13}\text{C}$  NMR ( $\text{CDCl}_3$ , 125 MHz)  $\delta$  42.0, 43.0, 44.5, 120.2 (4C), 123.7 (3C), 127.8 (3C), 129.0 (3C), 129.2 (3C), 129.2 (4C), 129.4 (2C), 132.2 (2C), 133.2 (2C), 148.0, 149.3, 186.4 (2C); HRMS (ESI-TOF,  $[\text{M} + \text{H}]^+$ ) calcd for  $\text{C}_{33}\text{H}_{24}\text{N}_3\text{O}_2\text{Cl}_4$ , 634.0623; found 634.0631.

**(6-(3-Chlorobenzoyl)-7-(4-chlorophenyl)-5-(phenylamino)-1,2,3,7-tetrahydroimidazo[1,2-a]pyridin-8-yl)(2,5-dichlorophenyl)methanone (5r)**

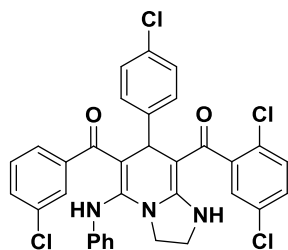

Light yellow powder; mp 215–217 °C; IR (KBr)  $\nu$  3439, 1684, 1629, 1590, 1527, 1498, 1487, 1456, 816, 781, 700  $\text{cm}^{-1}$ ;  $^1\text{H}$  NMR ( $\text{CDCl}_3$ , 500 MHz)  $\delta$  3.52–3.84 (m, 1H, NH), 4.03–4.09 (m, 2H,  $\text{CH}_2$ ), 4.28–4.39 (m, 2H,  $\text{CH}_2$ ), 4.46 (s, 1H, CH), 6.33 (s, 3H, ArH), 6.69–7.22 (m, 9H, ArH), 7.32–7.48 (m, 4H, ArH), 9.52 (s, 1H, NH);  $^{13}\text{C}$  NMR ( $\text{CDCl}_3$ , 125 MHz)  $\delta$  41.9, 42.9, 44.4, 120.2 (5C), 123.6 (4C), 127.7 (5C), 129.1 (6C), 132.1 (2C), 132.6 (2C), 133.1 (2C), 147.9, 149.3, 186.3 (2C); HRMS (ESI-TOF,  $[\text{M} + \text{H}]^+$ ) calcd for  $\text{C}_{33}\text{H}_{24}\text{N}_3\text{O}_2\text{Cl}_4$ , 634.0623; found 634.0630.

**8-(2,5-Dichlorobenzoyl)-N,5,7-triphenyl-1,2,3,7-tetrahydroimidazo[1,2-*a*]pyridine-6-carbothioamide (6a)**

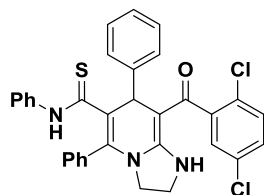

Yellow powder; mp 189–191 °C; IR (KBr)  $\nu$  3382, 1643, 1606, 1497, 1480, 1453, 1441, 1289, 765, 700  $\text{cm}^{-1}$ ;  $^1\text{H}$  NMR (DMSO- $d_6$ , 500 MHz)  $\delta$  3.22–3.24 (m, 1H, CH<sub>2</sub>), 3.78–3.79 (m, 3H, CH<sub>2</sub>), 5.12–5.54 (m, 1H, NH), 6.05–7.68 (m, 18H, ArH), 9.38 (s, 1H, CH), 10.18–10.42 (m, 1H, NH);  $^{13}\text{C}$  NMR (DMSO- $d_6$ , 125 MHz)  $\delta$  43.1, 45.6, 46.8, 87.8 (2C), 123.9, 124.7 (3C), 126.3, 126.6, 127.9 (4C), 128.1 (2C), 128.4 (4C), 128.6 (2C), 129.1 (2C), 130.7, 131.5, 133.4, 139.1, 143.2, 157.1, 185.7, 197.7; HRMS (ESI-TOF, [M + H]<sup>+</sup>) calcd for C<sub>33</sub>H<sub>26</sub>N<sub>3</sub>OSCl<sub>2</sub>, 582.1174; found 582.1185.

**8-(2,5-Dichlorobenzoyl)-N,5-diphenyl-7-(*p*-tolyl)-1,2,3,7-tetrahydroimidazo[1,2-*a*]pyridine-6-carbothioamide (6b)**

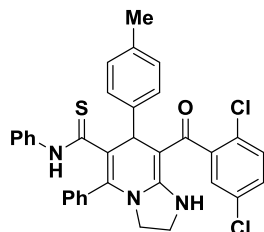

Yellow green powder; mp 227–229 °C; IR (KBr)  $\nu$  3384, 1643, 1605, 1508, 1479, 1451, 1289, 761, 700  $\text{cm}^{-1}$ ;  $^1\text{H}$  NMR (DMSO- $d_6$ , 500 MHz)  $\delta$  2.18 (s, 3H, CH<sub>3</sub>), 3.10–3.12 (m, 1H, CH<sub>2</sub>), 3.66–3.68 (m, 3H, CH<sub>2</sub>), 4.98–5.60 (m, 1H, NH), 5.93–7.56 (m, 17H, ArH), 9.26 (s, 1H, CH), 10.00–10.50 (m, 1H, NH);  $^{13}\text{C}$  NMR (DMSO- $d_6$ , 125 MHz)  $\delta$  21.1, 43.1, 45.1, 46.8, 87.9 (2C), 124.7 (2C), 126.6 (2C), 127.8 (2C), 128.4 (3C), 128.7 (3C), 128.9 (2C), 129.1 (2C), 130.7 (2C), 131.5 (2C), 133.4 (2C), 135.1 (2C), 139.1 (2C), 185.8, 197.7; HRMS (ESI-TOF, [M + H]<sup>+</sup>) calcd for C<sub>34</sub>H<sub>28</sub>N<sub>3</sub>OCl<sub>2</sub>S, 596.1330; found 596.1337.

**8-(2,5-Dichlorobenzoyl)-7-(4-methoxyphenyl)-N,5-diphenyl-1,2,3,7-tetrahydroimidazo[1,2-*a*]pyridine-6-carbothioamide (6c)**

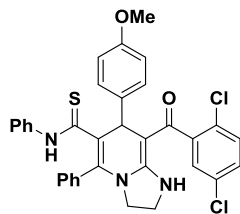

Yellow green powder; mp 212–214 °C; IR (KBr)  $\nu$  3440, 1639, 1606, 1508, 1498, 1479, 1287, 763, 700  $\text{cm}^{-1}$ ;  $^1\text{H}$  NMR (DMSO- $d_6$ , 500 MHz)  $\delta$  3.11–3.13 (m, 1H, CH<sub>2</sub>), 3.60–3.75 (m, 6H, CH<sub>2</sub> + CH<sub>3</sub>), 4.96–5.60 (m, 1H, NH), 5.74–7.57 (m, 17H, ArH), 9.26 (s, 1H, CH), 10.15–10.25 (m, 1H, NH);  $^{13}\text{C}$  NMR (DMSO- $d_6$ , 125 MHz)  $\delta$  43.1, 44.6, 46.8, 55.4, 88.0 (2C), 113.6 (2C), 124.7 (3C), 126.6 (3C), 128.4 (4C), 128.6 (2C), 128.9 (4C), 129.1 (3C), 130.7, 131.5, 133.5, 139.2, 158.0, 185.9, 197.8; HRMS (ESI-TOF, [M + H]<sup>+</sup>) calcd for C<sub>34</sub>H<sub>28</sub>N<sub>3</sub>O<sub>2</sub>Cl<sub>2</sub>S, 612.1279; found 612.1285.

**8-(2,5-Dichlorobenzoyl)-7-(4-fluorophenyl)-N,5-diphenyl-1,2,3,7-tetrahydroimidazo[1,2-*a*]pyridine-6-carbothioamide (6d)**

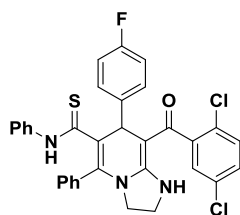

Yellow powder; mp 172–174 °C; IR (KBr)  $\nu$  3439, 1643, 1601, 1504, 1479, 1452, 1290, 763, 697  $\text{cm}^{-1}$ ;  $^1\text{H}$  NMR (DMSO- $d_6$ , 500 MHz)  $\delta$  3.23–3.24 (m, 1H, CH<sub>2</sub>), 3.78–3.83 (m, 3H, CH<sub>2</sub>), 5.13–5.27 (m, 1H, NH), 6.11–7.66 (m, 17H, ArH), 9.40 (s, 1H, CH), 10.26–10.38 (m, 1H, NH);  $^{13}\text{C}$  NMR (DMSO- $d_6$ , 125 MHz)  $\delta$  43.1, 44.8, 46.7, 87.6, 114.7 ( $^2J_{\text{C-F}} = 20.7$  Hz) (2C), 124.7 (3C), 126.7 (2C), 127.2 (2C), 128.5 (4C), 128.6 (2C), 129.0, 129.2 (2C), 129.7 (2C), 130.6, 131.6, 133.3, 139.1, 143.3, 157.0, 161.1 ( $^1J_{\text{C-F}} = 241.9$  Hz), 185.8, 197.6; HRMS (ESI-TOF, [M + H]<sup>+</sup>) calcd for C<sub>33</sub>H<sub>25</sub>N<sub>3</sub>OSC<sub>2</sub>F, 600.1079; found 600.1082.

**7-(4-Chlorophenyl)-8-(2,5-dichlorobenzoyl)-N,5-diphenyl-1,2,3,7-tetrahydroimidazo[1,2-*a*]pyridine-6-carbothioamide (6e)**

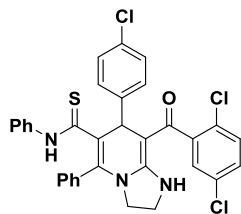

Yellow powder; mp 208–210 °C; IR (KBr)  $\nu$  3379, 1643, 1604, 1497, 1481, 1451, 1443, 1288, 765, 704  $\text{cm}^{-1}$ ;  $^1\text{H}$  NMR (DMSO- $d_6$ , 500 MHz)  $\delta$  3.07–3.20 (m, 1H, CH<sub>2</sub>), 3.63–3.75 (m, 3H, CH<sub>2</sub>), 5.02–5.13 (m, 1H, NH), 6.02–7.55 (m, 17H, ArH), 9.30 (s, 1H, CH), 10.18–10.22 (m, 1H, NH);  $^{13}\text{C}$  NMR (DMSO- $d_6$ , 125 MHz)  $\delta$  43.2, 44.9, 46.7, 79.6, 87.3, 124.7 (3C), 126.7, 128.1 (3C), 128.5 (3C), 128.9 (2C), 129.2 (2C), 129.7 (3C), 130.6 (2C), 131.0 (2C), 131.6 (2C), 133.3 (2C), 139.1, 185.7, 197.5; HRMS (ESI-TOF,  $[\text{M} + \text{H}]^+$ ) calcd for C<sub>33</sub>H<sub>25</sub>N<sub>3</sub>OCl<sub>3</sub>S, 616.0784; found 616.0796.

**7-(4-Bromophenyl)-8-(2,5-dichlorobenzoyl)-N,5-diphenyl-1,2,3,7-tetrahydroimidazo[1,2-a]pyridine-6-carbothioamide (6f)**

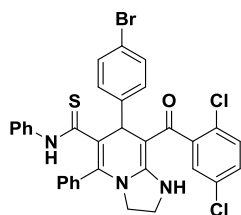

Yellow powder; mp 224–226 °C; IR (KBr)  $\nu$  3442, 1640, 1605, 1497, 1481, 1451, 1446, 1289, 816, 745, 704  $\text{cm}^{-1}$ ;  $^1\text{H}$  NMR (DMSO- $d_6$ , 500 MHz)  $\delta$  3.19–3.29 (m, 1H, CH<sub>2</sub>), 3.70–3.85 (m, 3H, CH<sub>2</sub>), 5.11–5.25 (m, 1H, NH), 6.12–7.64 (m, 17H, ArH), 9.40 (s, 1H, CH), 10.29–10.38 (m, 1H, NH);  $^{13}\text{C}$  NMR (DMSO- $d_6$ , 125 MHz)  $\delta$  43.2, 45.1, 46.8, 87.3 (2C), 119.6 (2C), 124.7 (3C), 126.7, 127.3, 127.5, 128.5 (3C), 128.5, 128.7, 128.9, 129.2, 130.1 (3C), 130.6, 131.0 (3C), 131.7, 133.3, 139.1, 157.0, 185.7, 197.5; HRMS (ESI-TOF,  $[\text{M} + \text{H}]^+$ ) calcd for C<sub>33</sub>H<sub>25</sub>N<sub>3</sub>OSCl<sub>2</sub>Br, 660.0279; found 660.0285.

**7-(2-Chlorophenyl)-8-(2,5-dichlorobenzoyl)-N,5-diphenyl-1,2,3,7-tetrahydroimidazo[1,2-a]pyridine-6-carbothioamide (6g)**

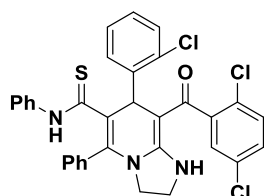



Yellow powder; mp 193–195 °C; IR (KBr)  $\nu$  3386, 1644, 1606, 1497, 1480, 1445, 1442, 1289, 761  $\text{cm}^{-1}$ ;  $^1\text{H}$  NMR (DMSO- $d_6$ , 500 MHz)  $\delta$  3.27–3.30 (m, 1H, CH<sub>2</sub>), 3.77–3.78 (m, 3H, CH<sub>2</sub>), 5.37–5.54 (m, 1H, NH), 5.93–7.60 (m, 17H, ArH), 9.36–9.40 (m, 1H, CH), 10.47–10.78 (m, 1H, NH);  $^{13}\text{C}$  NMR (DMSO- $d_6$ , 125 MHz)  $\delta$  42.6, 43.3, 46.7, 88.4 (2C), 124.4, 124.8, 126.5 (2C), 127.9 (3C), 128.5 (4C), 128.8, 129.1 (3C), 130.5 (3C), 131.1, 131.8 (3C), 133.2, 139.3, 143.3, 157.5, 185.6, 197.1; HRMS (ESI-TOF, [M + H]<sup>+</sup>) calcd for C<sub>33</sub>H<sub>26</sub>N<sub>3</sub>OSCl<sub>3</sub>, 616.0784; found 616.0775.

**7-(3-Chlorophenyl)-8-(2,5-dichlorobenzoyl)-N,5-diphenyl-1,2,3,7-tetrahydroimidazo[1,2-a]pyridine-6-carbothioamide (6h)**

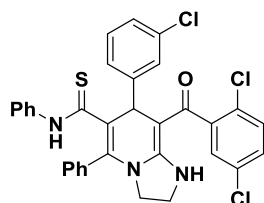

Yellow green powder; mp 164–166 °C; IR (KBr)  $\nu$  3445, 1644, 1606, 1497, 1479, 1444, 1290, 769, 703  $\text{cm}^{-1}$ ;  $^1\text{H}$  NMR (DMSO- $d_6$ , 500 MHz)  $\delta$  3.24–3.25 (m, 1H, CH<sub>2</sub>), 3.77–3.84 (m, 3H, CH<sub>2</sub>), 5.10–5.35 (m, 1H, NH), 6.15–7.63 (m, 17H, ArH), 9.41 (s, 1H, CH), 10.30–10.40 (m, 1H, NH);  $^{13}\text{C}$  NMR (DMSO- $d_6$ , 125 MHz)  $\delta$  43.2, 45.5, 46.7, 87.1 (2C), 122.8, 124.7 (2C), 126.3, 126.7 (3C), 127.8, 128.5 (4C), 128.9, 129.2 (3C), 129.9, 130.6, 131.1, 131.7, 132.8, 133.2, 139.0, 143.1, 149.1, 156.9, 185.7, 197.5; HRMS (ESI-TOF, [M + H]<sup>+</sup>) calcd for C<sub>33</sub>H<sub>25</sub>N<sub>3</sub>OSCl<sub>3</sub>, 616.0784; found 616.0796.

**7-(4-Chlorophenyl)-8-(2-methylbenzoyl)-N,5-diphenyl-1,2,3,7-tetrahydroimidazo[1,2-a]pyridine-6-carbothioamide (6i)**

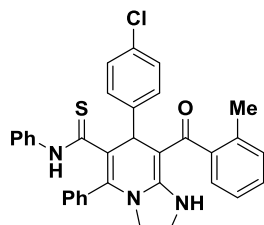

Yellow powder; mp 235–237 °C; IR (KBr)  $\nu$  3244, 1645, 1606, 1499, 1475, 1452, 1363, 785, 699  $\text{cm}^{-1}$ ;  $^1\text{H}$  NMR (DMSO- $d_6$ , 500 MHz)  $\delta$  1.78 (s, 3H, CH<sub>3</sub>), 3.12–3.14 (m, 1H, CH<sub>2</sub>), 3.67–3.71 (m, 3H, CH<sub>2</sub>), 5.14 (s, 1H, NH), 6.70–7.58 (m, 18H, ArH), 9.31 (s, 1H, CH), 10.20 (s, 1H, NH);  $^{13}\text{C}$  NMR (CDCl<sub>3</sub>, 125 MHz)  $\delta$  18.6, 42.7, 46.0, 46.8, 88.7 (2C), 123.8, 125.3 (2C), 125.6, 126.8, 127.9, 128.1 (2C), 128.2, 128.5 (2C),

128.8, 129.0 (2C), 129.2, 129.4, 129.7, 130.1, 131.0, 131.9, 133.3, 134.3, 137.7, 141.5, 145.3, 156.8, 194.3 197.0; HRMS (ESI-TOF,  $[M + H]^+$ ) calcd for  $C_{34}H_{29}N_3OSCl$ , 562.1720, found 562.1725.

**7-(4-Chlorophenyl)-8-(2-fluorobenzoyl)-*N*,5-diphenyl-1,2,3,7-tetrahydroimidazo [1,2-*a*]pyridine-6-carbothioamide (6j)**

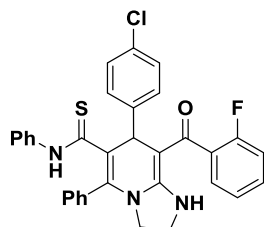

Yellow powder; mp 217–219 °C; IR (KBr)  $\nu$  3370, 1640, 1606, 1497, 1479, 1452, 782, 759, 703  $cm^{-1}$ ;  $^1H$  NMR ( $CDCl_3$ , 500 MHz)  $\delta$  3.18–3.34 (m, 1H,  $CH_2$ ), 3.61–3.92 (m, 3H,  $CH_2$ ), 5.39 (s, 1H, NH), 6.59–7.22 (m, 13H, ArH), 7.42–7.57 (m, 6H, ArH), 9.49 (s, 1H, NH);  $^{13}C$  NMR ( $CDCl_3$ , 125 MHz)  $\delta$  42.7, 45.4, 46.8, 88.9 (2C), 115.7 ( $^2J_{C-F}$  = 21.7 Hz) (2C), 123.8, 124.0, 125.3, 127.0, 128.0, 128.2 (3C), 128.6 (3C), 128.7 (2C), 128.9, 129.2, 129.5, 129.8, 130.6, 132.0, 133.1, 137.6, 145.0, 157.1, 158.4 ( $^1J_{C-F}$  = 241.9 Hz), 188.1, 197.7; HRMS (ESI-TOF,  $[M + H]^+$ ) calcd for  $C_{33}H_{26}N_3OSClF$ , 566.1469, found 566.1475.

**8-(2-Chlorobenzoyl)-7-(4-chlorophenyl)-*N*,5-diphenyl-1,2,3,7-tetrahydroimidazo [1,2-*a*]pyridine-6-carbothioamide (6k)**

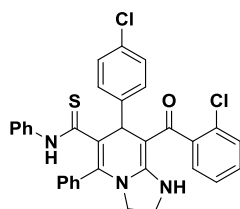

Yellow green powder; mp 241–243 °C; IR (KBr)  $\nu$  3441, 1636, 1606, 1497, 1478, 1442, 1290, 760, 703  $cm^{-1}$ ;  $^1H$  NMR ( $DMSO-d_6$ , 500 MHz)  $\delta$  3.05–3.15 (m, 1H,  $CH_2$ ), 3.60–3.75 (m, 3H,  $CH_2$ ), 5.05–5.14 (m, 1H, NH), 6.21–7.54 (m, 18H, ArH), 9.29 (s, 1H, CH), 10.02–10.33 (m, 1H, NH);  $^{13}C$  NMR ( $DMSO-d_6$ , 125 MHz)  $\delta$  43.1, 45.2, 46.8, 87.4 (2C), 123.5, 124.7 (3C), 126.7 (2C), 128.0 (3C), 128.5 (4C), 128.7, 128.9, 129.2, 129.7 (3C), 130.6, 130.7, 131.5, 133.4, 139.1, 141.5, 156.9, 187.8, 197.7; HRMS (ESI-TOF,  $[M + H]^+$ ) calcd for  $C_{33}H_{26}N_3OCl_2S$ , 582.1174; found 582.1170.

**8-(2-Bromobenzoyl)-7-(4-chlorophenyl)-*N*,5-diphenyl-1,2,3,7-tetrahydroimidazo [1,2-*a*]pyridine-6-carbothioamide (6l)**

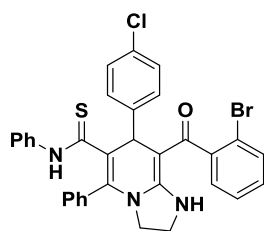

Yellow powder; mp 221–222 °C; IR (KBr)  $\nu$  3278, 1633, 1601, 1498, 1477, 1442, 780, 760  $\text{cm}^{-1}$ ;  $^1\text{H}$  NMR ( $\text{CDCl}_3$ , 500 MHz)  $\delta$  3.20–3.38 (m, 1H,  $\text{CH}_2$ ), 3.70–3.88 (m, 3H,  $\text{CH}_2$ ), 5.12–5.40 (m, 1H, NH), 6.33–7.11 (m, 11H, ArH), 7.41–7.58 (m, 8H, ArH), 9.45 (s, 1H, NH);  $^{13}\text{C}$  NMR ( $\text{CDCl}_3$ , 125 MHz)  $\delta$  42.7, 45.9, 46.9, 88.1 (2C), 119.5, 124.0 (2C), 125.5, 127.0 (3C), 128.2 (3C), 128.6 (4C), 128.9 (3C), 129.2 (2C), 129.5 (2C), 129.8, 132.0, 133.1, 137.5, 157.2, 190.9, 197.7; HRMS (ESI-TOF,  $[\text{M} + \text{H}]^+$ ) calcd for  $\text{C}_{33}\text{H}_{26}\text{N}_3\text{O}\text{SClBr}$ , 626.0668, found 626.0675.

**7-(4-Chlorophenyl)-8-(2,4-dichlorobenzoyl)-N,5-diphenyl-1,2,3,7-tetrahydroimidazo[1,2-a]pyridine-6-carbothioamide (6m)**

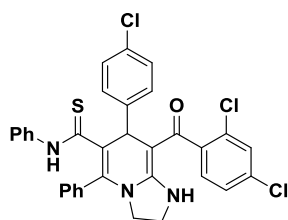

Light yellow powder; mp 183–185 °C; IR (KBr)  $\nu$  3441, 1643, 1606, 1497, 1481, 1443, 1290, 825, 749, 705  $\text{cm}^{-1}$ ;  $^1\text{H}$  NMR ( $\text{DMSO}-d_6$ , 500 MHz)  $\delta$  3.05–3.18 (m, 1H,  $\text{CH}_2$ ), 3.63–3.75 (m, 3H,  $\text{CH}_2$ ), 5.05–5.12 (m, 1H, NH), 6.23–7.54 (m, 17H, ArH), 9.29 (s, 1H, CH), 10.10–10.35 (m, 1H, NH);  $^{13}\text{C}$  NMR ( $\text{DMSO}-d_6$ , 125 MHz)  $\delta$  43.2, 45.5, 46.8, 87.3 (2C), 123.3, 124.8 (3C), 126.7 (2C), 128.1 (3C), 128.5 (4C), 128.7 (2C), 128.9, 129.2 (2C), 129.6 (3C), 130.6, 130.9, 133.3, 139.1, 157.0, 186.4, 197.5; HRMS (ESI-TOF,  $[\text{M} + \text{H}]^+$ ) calcd for  $\text{C}_{33}\text{H}_{25}\text{N}_3\text{OCl}_3\text{S}$ , 616.0784; found 616.0789.

**8-Acetyl-7-(4-chlorophenyl)-N,5-diphenyl-1,2,3,7-tetrahydroimidazo[1,2-a]pyridine-6-carbothioamide (6n)**

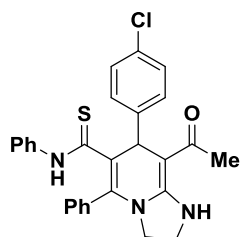

Yellow powder; mp 233–235 °C; IR (KBr)  $\nu$  3295, 3055, 2879, 1652, 1612, 1479, 1367, 837, 750  $\text{cm}^{-1}$ ;  $^1\text{H}$  NMR ( $\text{CDCl}_3$ , 500 MHz)  $\delta$  1.92 (s, 3H,  $\text{CH}_3$ ), 3.10–3.22 (m, 1H,  $\text{CH}_2$ ), 3.60–3.78 (m, 3H,  $\text{CH}_2$ ), 5.66 (s, 1H, NH), 6.69–6.70 (m, 2H, ArH), 7.12–7.25 (m, 4H, ArH), 7.35–7.68 (m, 9H, ArH), 9.25 (s, 1H, NH);  $^{13}\text{C}$  NMR ( $\text{CDCl}_3$ , 125 MHz)  $\delta$  26.7, 42.5, 45.8, 46.8, 87.4 (2C), 124.1, 124.6, 127.1, 128.0 (2C), 128.6 (3C), 128.7 (4C), 129.4, 129.8, 131.4, 132.3, 133.4, 137.7, 144.8, 155.8, 194.4, 198.3; HRMS (ESI-TOF,  $[\text{M} + \text{H}]^+$ ) calcd for  $\text{C}_{28}\text{H}_{25}\text{N}_3\text{OSCl}$ , 486.1407, found 486.1425.

**7-(4-Chlorophenyl)-8-nitro-*N*,5-diphenyl-1,2,3,7-tetrahydroimidazo[1,2-*a*]pyridine-6-carbothioamide (6o)**

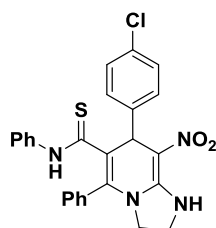

Light yellow powder; mp 209–211 °C; IR (KBr)  $\nu$  3421, 3351, 3250, 3061, 2884, 1637, 1602, 1488, 1456, 1377, 850, 768  $\text{cm}^{-1}$ ;  $^1\text{H}$  NMR ( $\text{DMSO-}d_6$ , 500 MHz)  $\delta$  3.26–3.33 (m, 1H,  $\text{CH}_2$ ), 3.70–3.80 (m, 3H,  $\text{CH}_2$ ), 5.69 (s, 1H, NH), 6.75 (d,  $J = 7.70$  Hz, 2H, ArH), 7.09–7.62 (m, 12H, ArH), 9.32 (s, 1H, CH), 10.45 (s, 1H, NH);  $^{13}\text{C}$  NMR ( $\text{CDCl}_3$ , 125 MHz)  $\delta$  45.8, 47.6, 49.9, 108.1 (2C), 124.9, 126.9 (2C), 129.1 (2C), 129.7, 130.6 (3C), 130.8 (3C), 131.3, 131.7, 132.2 (2C), 132.8, 133.7, 135.0, 141.2, 144.2, 155.1, 198.6; HRMS (ESI-TOF,  $[\text{M} + \text{H}]^+$ ) calcd for  $\text{C}_{26}\text{H}_{22}\text{N}_4\text{O}_2\text{SCl}$ , 489.1152, found 489.1165.

**5-(2-Chlorophenyl)-7-(4-chlorophenyl)-8-(2,5-dichlorobenzoyl)-*N*-phenyl-1,2,3,7-tetrahydroimidazo[1,2-*a*]pyridine-6-carbothioamide (6p)**

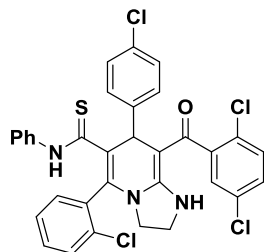

Yellow powder; mp 213–215 °C; IR (KBr)  $\nu$  3440, 3360, 3046, 2898, 1653, 1609, 1510, 1488, 1363, 808, 751  $\text{cm}^{-1}$ ;  $^1\text{H}$  NMR ( $\text{CDCl}_3$ , 500 MHz)  $\delta$  3.30–3.36 (m, 1H,  $\text{CH}_2$ ), 3.64–3.66 (m, 1H,  $\text{CH}_2$ ), 3.79–3.89 (m, 2H,  $\text{CH}_2$ ), 5.08 (s, 1H, NH), 6.21–7.85 (m, 17H, ArH), 9.41 (s, 1H, NH);  $^{13}\text{C}$  NMR ( $\text{CDCl}_3$ , 125 MHz)  $\delta$  43.0, 44.1, 45.3,

87.9 (2C), 123.7 (3C), 125.8, 127.1 (2C), 128.3 (3C), 128.6 (3C), 129.0 (3C), 130.0, 130.5, 131.3, 131.4, 132.0, 132.4, 133.4, 137.6, 141.9, 144.9, 156., 188.3, 197.0; HRMS (ESI-TOF,  $[M + H]^+$ ) calcd for  $C_{33}H_{24}N_3OSCl_4$ , 650.0394, found 650.0383.

**5-(3-Chlorophenyl)-7-(4-chlorophenyl)-8-(2,5-dichlorobenzoyl)-*N*-phenyl-1,2,3,7-tetrahydroimidazo[1,2-*a*]pyridine-6-carbothioamide (6q)**

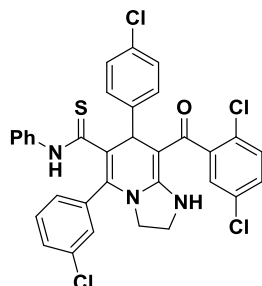

Yellow powder; mp 173-175 °C; IR (KBr)  $\nu$  3440, 2919, 2847, 1644, 1608, 1494, 1452, 1361, 818, 691  $cm^{-1}$ ;  $^1H$  NMR ( $CDCl_3$ , 500 MHz)  $\delta$  3.29–3.31 (m, 1H,  $CH_2$ ), 3.75–3.86 (m, 3H,  $CH_2$ ), 5.13 (s, 1H, NH), 6.64–7.17 (m, 11H, ArH), 7.27–7.56 (m, 6H, ArH), 9.45 (s, 1H, NH);  $^{13}C$  NMR ( $CDCl_3$ , 125 MHz)  $\delta$  42.6, 45.2, 46.7, 88.2 (2C), 123.7 (2C), 124.7, 125.6, 127.0, 127.5, 128.3 (3C), 128.6 (3C), 128.9 (3C), 129.7 (2C), 130.6 (2C), 131.1, 132.3 (2C), 135.6, 137.4, 141.7, 157.2, 187.7, 197.2; HRMS (ESI-TOF,  $[M + H]^+$ ) calcd for  $C_{33}H_{24}N_3OSCl_4$ , 650.0394, found 650.0399.

**5,7-Bis(4-chlorophenyl)-8-(2,5-dichlorobenzoyl)-*N*-phenyl-1,2,3,7-tetrahydroimidazo[1,2-*a*]pyridine-6-carbothioamide (6r)**

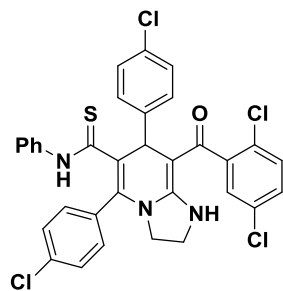

Yellow powder; mp 164–166 °C; IR (KBr)  $\nu$  3441, 2921, 2884, 1644, 1605, 1494, 1453, 1361, 816, 694  $cm^{-1}$ ;  $^1H$  NMR ( $CDCl_3$ , 500 MHz)  $\delta$  3.28–3.30 (m, 1H,  $CH_2$ ), 3.67–3.86 (m, 3H,  $CH_2$ ), 5.00–5.40 (m, 1H, NH), 6.19–6.98 (m, 12H, ArH), 7.33–7.56 (m, 5H, ArH), 9.44 (s, 1H, NH);  $^{13}C$  NMR ( $CDCl_3$ , 125 MHz)  $\delta$  42.7, 45.4, 46.8, 88.2 (2C), 122.7, 123.8 (2C), 125.8, 127.2, 128.4 (3C), 128.7 (4C), 129.1 (3C), 129.5, 129.8, 129.9, 130.1, 130.8, 131.2, 132.4, 132.7, 135.7, 137.3, 157.2, 188.2, 197.4; HRMS (ESI-TOF,  $[M + H]^+$ ) calcd for  $C_{33}H_{24}N_3OSCl_4$ , 650.0386, found 650.0399.

SP-E-9

1H

2012 04 24

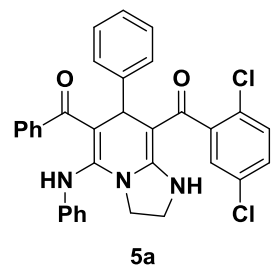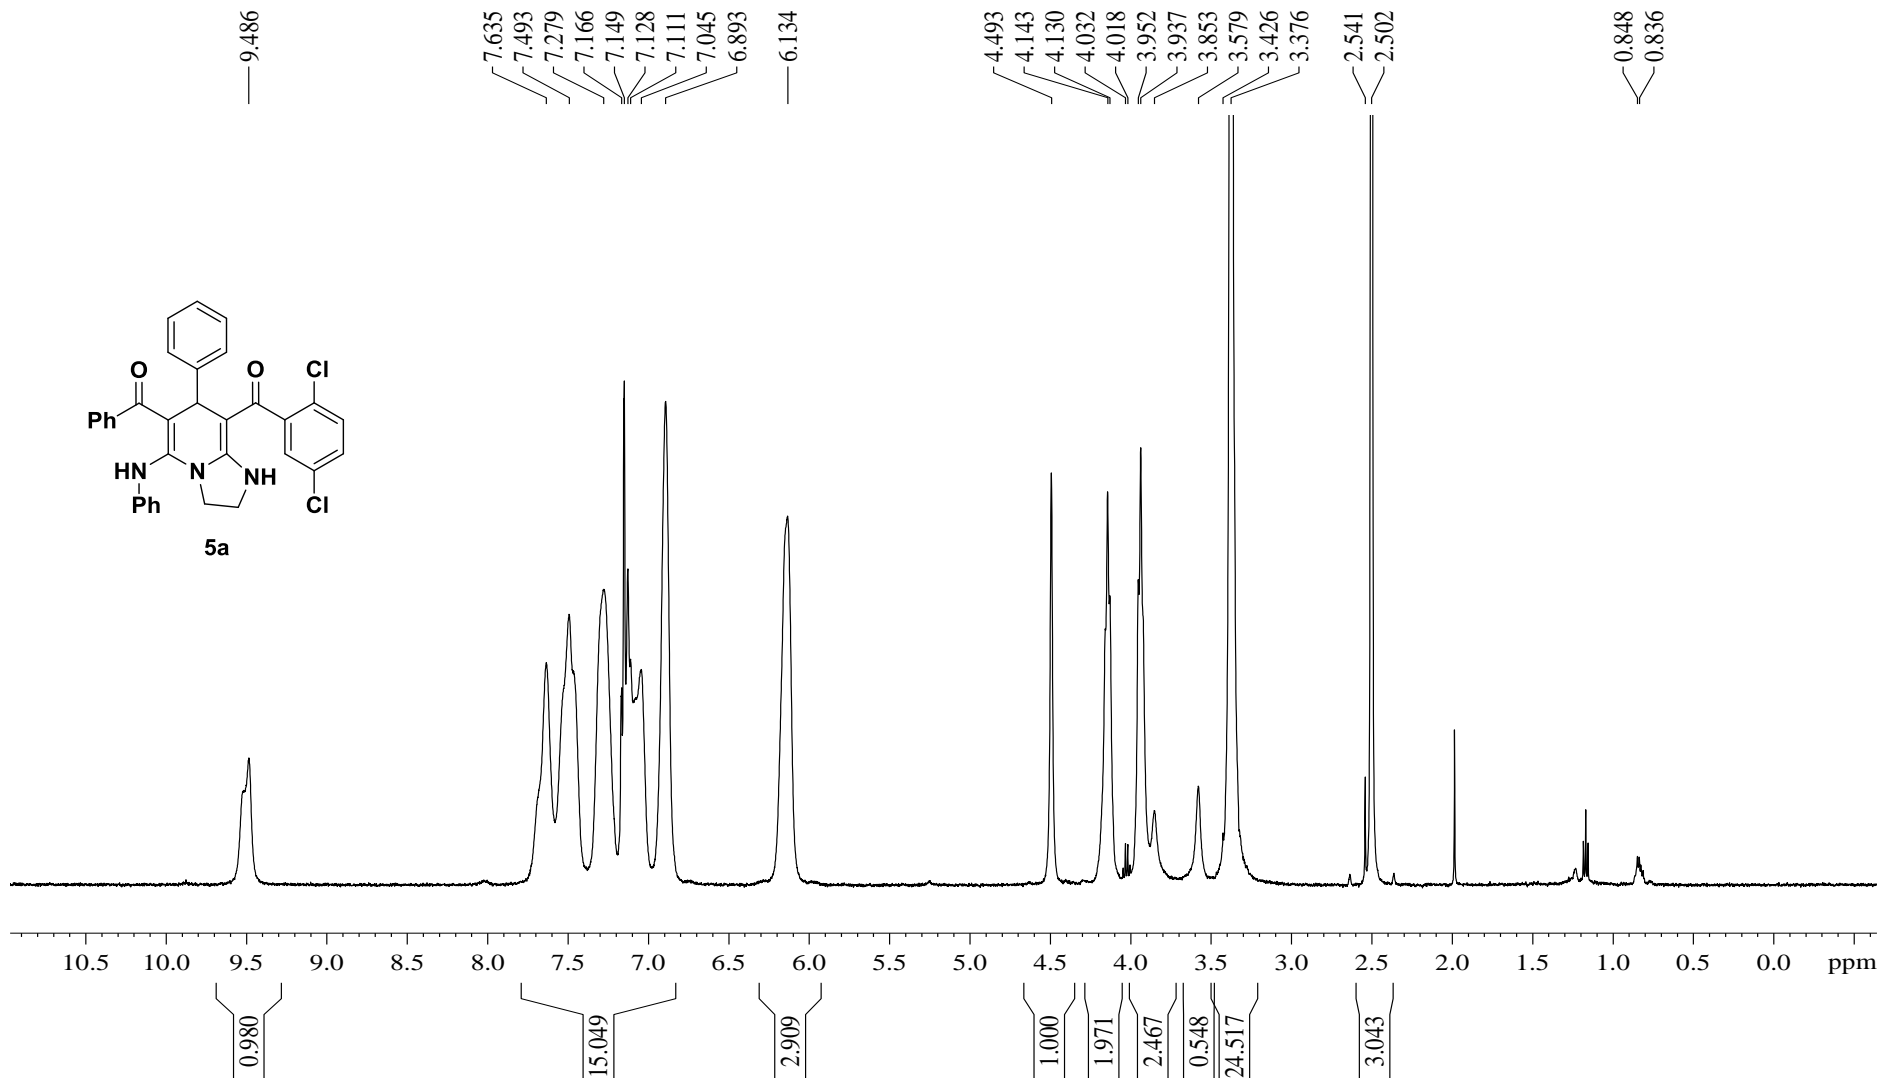

SP-E-9 13C 1D 2012 04 29

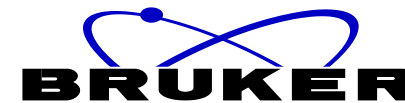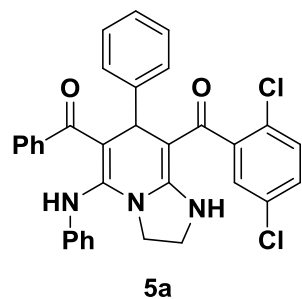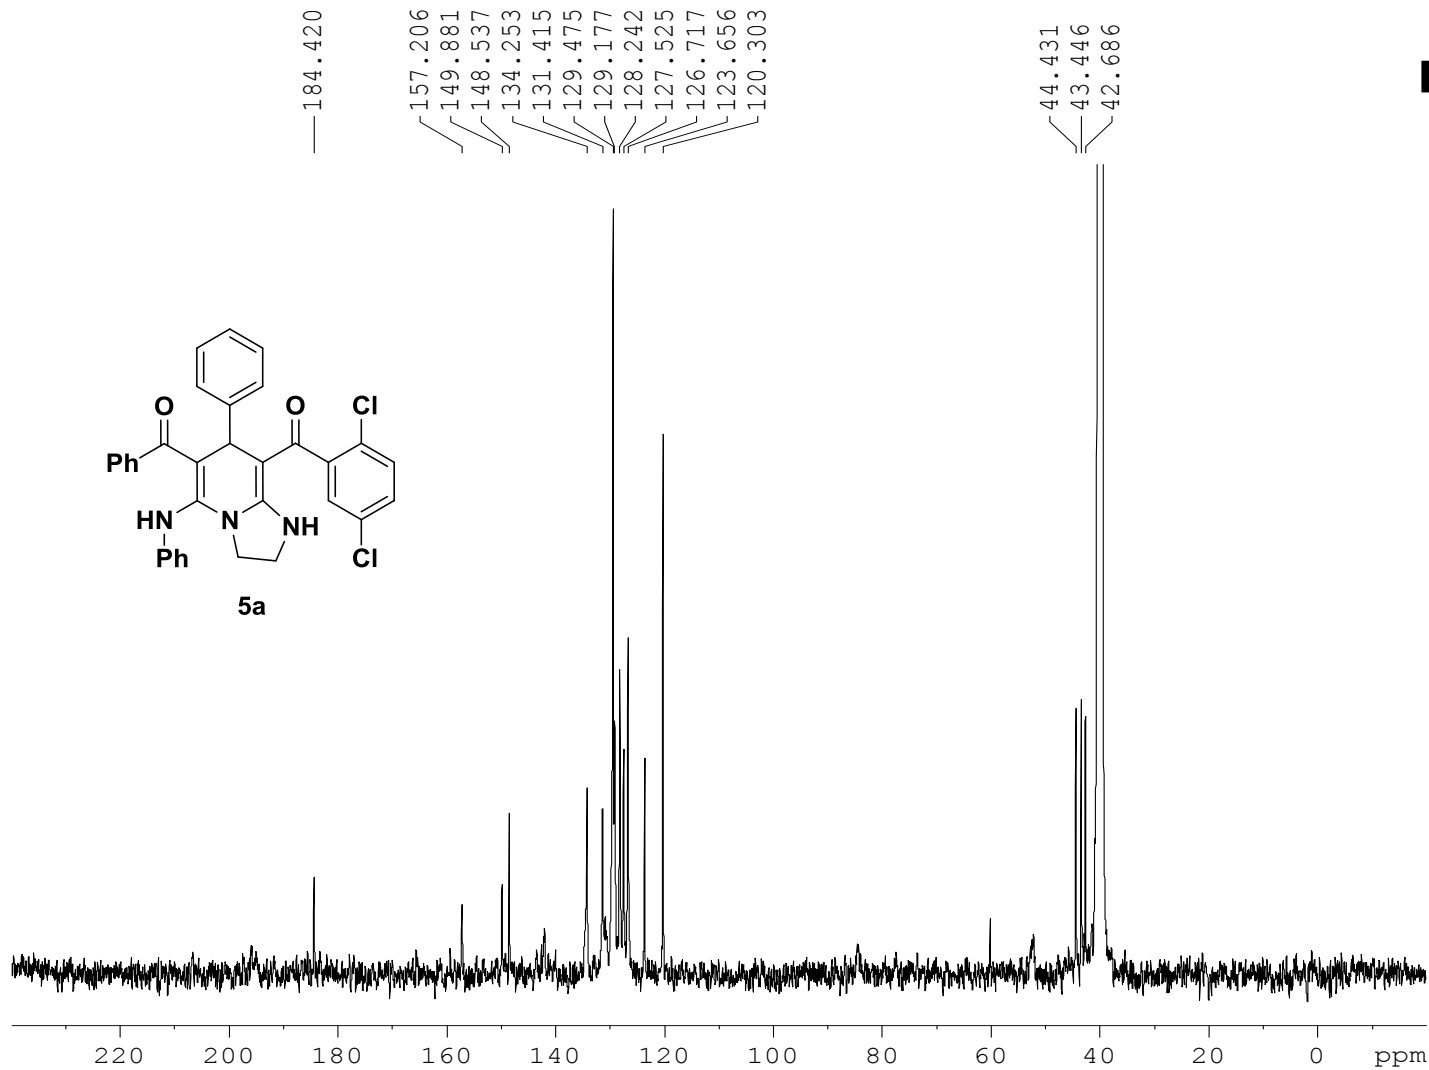

NAM SP-E-  
EXPNO 2  
PROCNO 1  
Date\_ 20120429  
Time\_ 21.35  
INSTRUM av500  
PROBHD 5 mm PABBO BB-  
PULPROG zgpg30  
TD 65536  
SOLVENT DMSO  
NS 2061  
DS 2  
SWH 32679.738 Hz  
FIDRES 0.498653 Hz  
AQ 1.0027661 sec  
RG 1620  
DW 15.300 usec  
DE 6.00 usec  
TE 299.3 K  
D1 2.00000000 sec  
d11 0.03000000 sec  
DELTA 1.89999998 sec  
TD0 1

==== CHANNEL f1 =====  
NUC1 13C  
P1 9.60 usec  
PL1 2.00 dB  
SFO1 125.7464750 MHz

==== CHANNEL f2 =====  
CPDPRG2 waltz16  
NUC2 1H  
PCPD2 80.00 usec  
PL2 2.20 dB  
PL12 17.66 dB  
PL13 17.66 dB  
SFO2 500.0355000 MHz  
SI 32768  
SF 125.7326485 MHz  
WDW EM  
SSB 0  
LB 8.00 Hz  
GB 0  
PC 2.00

SP-E-3

1H 1D 2014 07 03

9.527

7.532 7.465 7.357 7.258 7.042 7.027 6.963 6.932 6.919 6.684 6.337 6.325 4.577 4.392 4.380 4.371 4.358 4.350 4.337 4.266 4.125 4.111 4.098 4.082 4.063 4.042 4.029 4.022 4.009 4.002 3.989 2.325

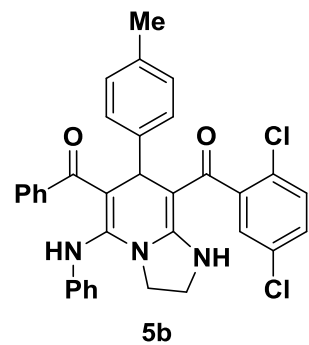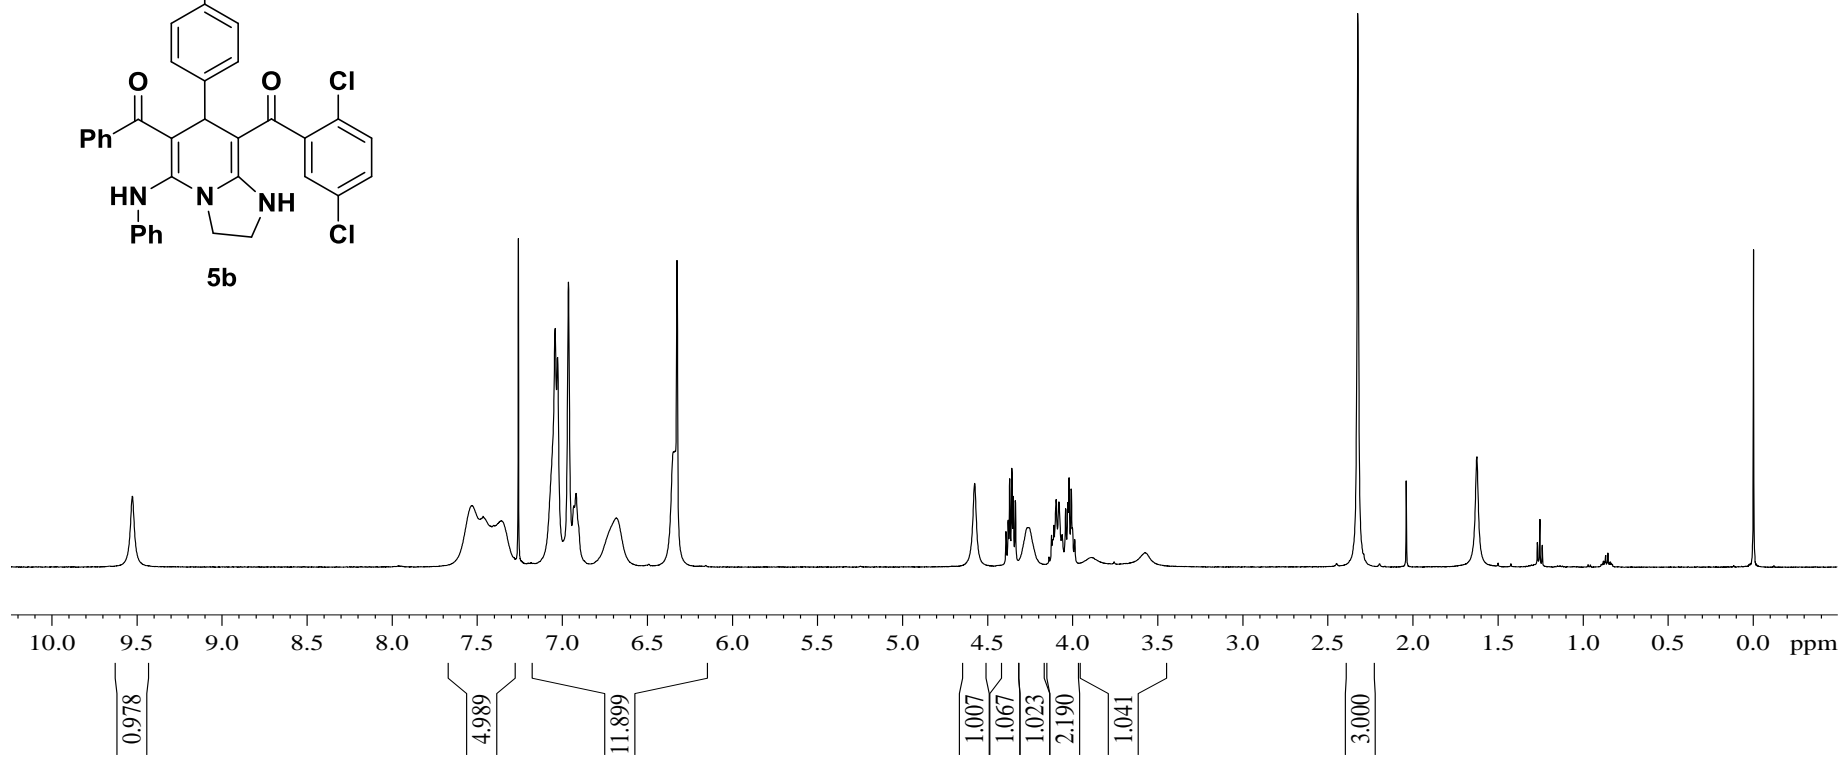



SP-E-3 13C 1D 2012 04 28

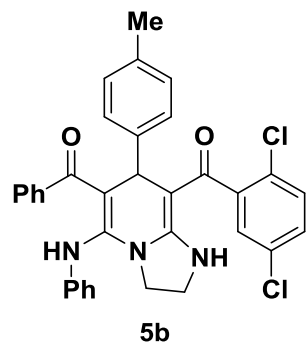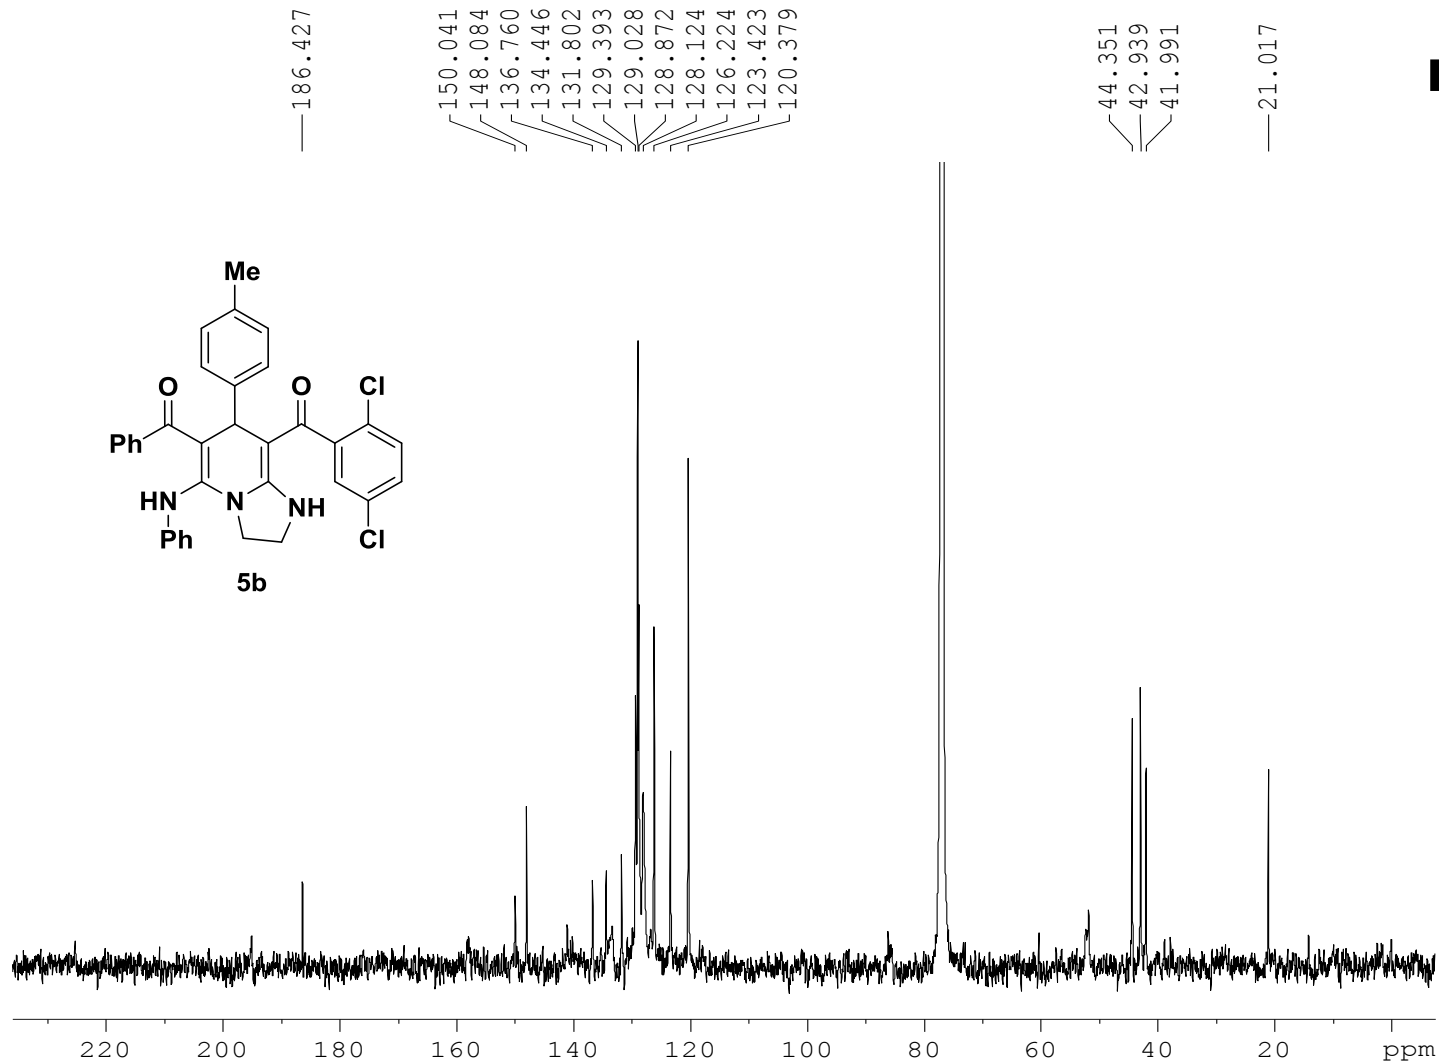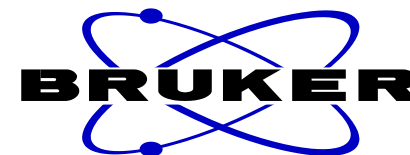

NAME SP-E-3  
EXPNO 2  
PROCNO 1  
Date\_ 20120428  
Time 10.23  
INSTRUM av500  
PROBHD 5 mm PABBO BB-  
PULPROG zgpg30  
TD 65536  
SOLVENT CDC13  
NS 1705  
DS 2  
SWH 32679.738 Hz  
FIDRES 0.498653 Hz  
AQ 1.0027661 sec  
RG 1620  
DW 15.300 usec  
DE 6.00 usec  
TE 297.4 K  
D1 2.0000000 sec  
d11 0.0300000 sec  
DELTA 1.89999998 sec  
TDO 1

==== CHANNEL f1 =====  
NUC1 13C  
P1 9.60 usec  
PL1 2.00 dB  
SFO1 125.7464750 MHz

==== CHANNEL f2 =====  
CPDPRG2 waltz16  
NUC2 1H  
PCPD2 80.00 usec  
PL2 2.60 dB  
PL12 17.66 dB  
PL13 17.66 dB  
SFO2 500.0355000 MHz  
SI 32768  
SF 125.7326507 MHz  
WDW EM  
SSB 0  
LB 8.00 Hz  
GB 0  
PC 2.00

SP-E-2 1H 2011 12 16

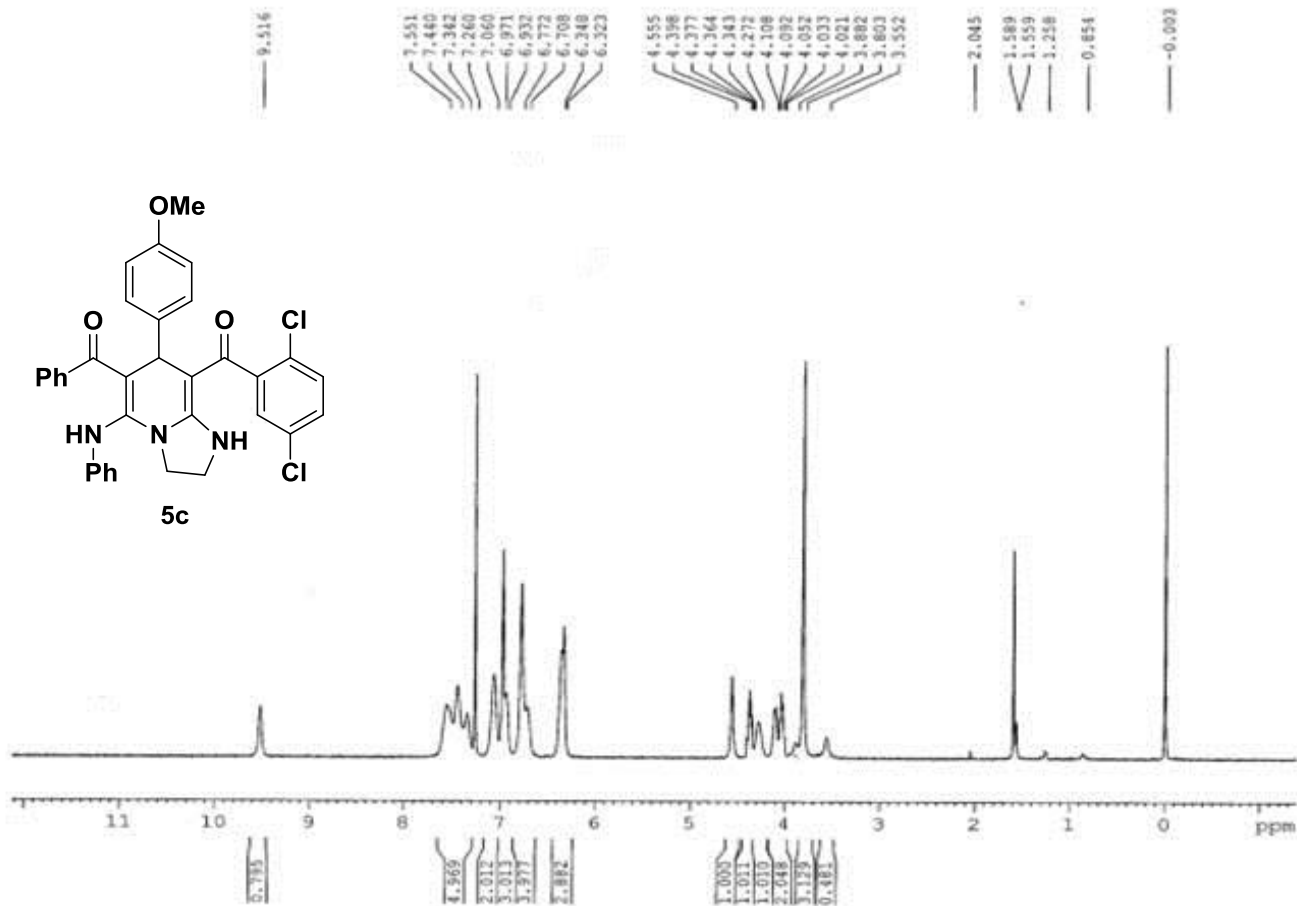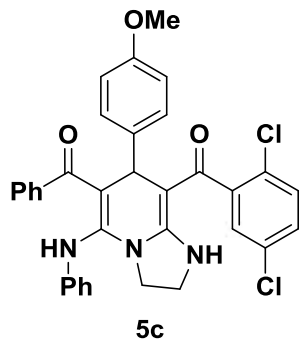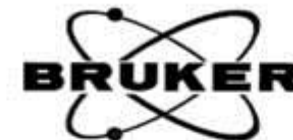

Current Data Parameters  
NAME SP-E-2  
EXPNO 1  
PROCNO 1

F2 - Acquisition Parameters  
Date\_ 20111216  
Time 19.18  
INSTRUM av500  
PROBHD 5 mm PABBO BB-  
PULPROG zg30  
TD 32768  
SOLVENT CDCl3  
NS 4  
DS 1  
SWH 10000.000 Hz  
FIDRES 0.305176 Hz  
AQ 1.6385000 sec  
RG 362  
DW 50.000 usec  
DE 6.00 usec  
TE 293.4 K  
D1 2.00000000 sec  
YD0 1

----- CHANNEL f1 -----  
NUC1 1H  
P1 13.50 usec  
PL1 2.20 dB  
SFO1 500.0335010 MHz

F2 - Processing parameters  
SI 16384  
SF 500.0300103 MHz  
WDW EM  
SSB 0  
LB 0.30 Hz  
GB 0  
PC 2.00

SP-E-2 13C 1D 2011 12 20

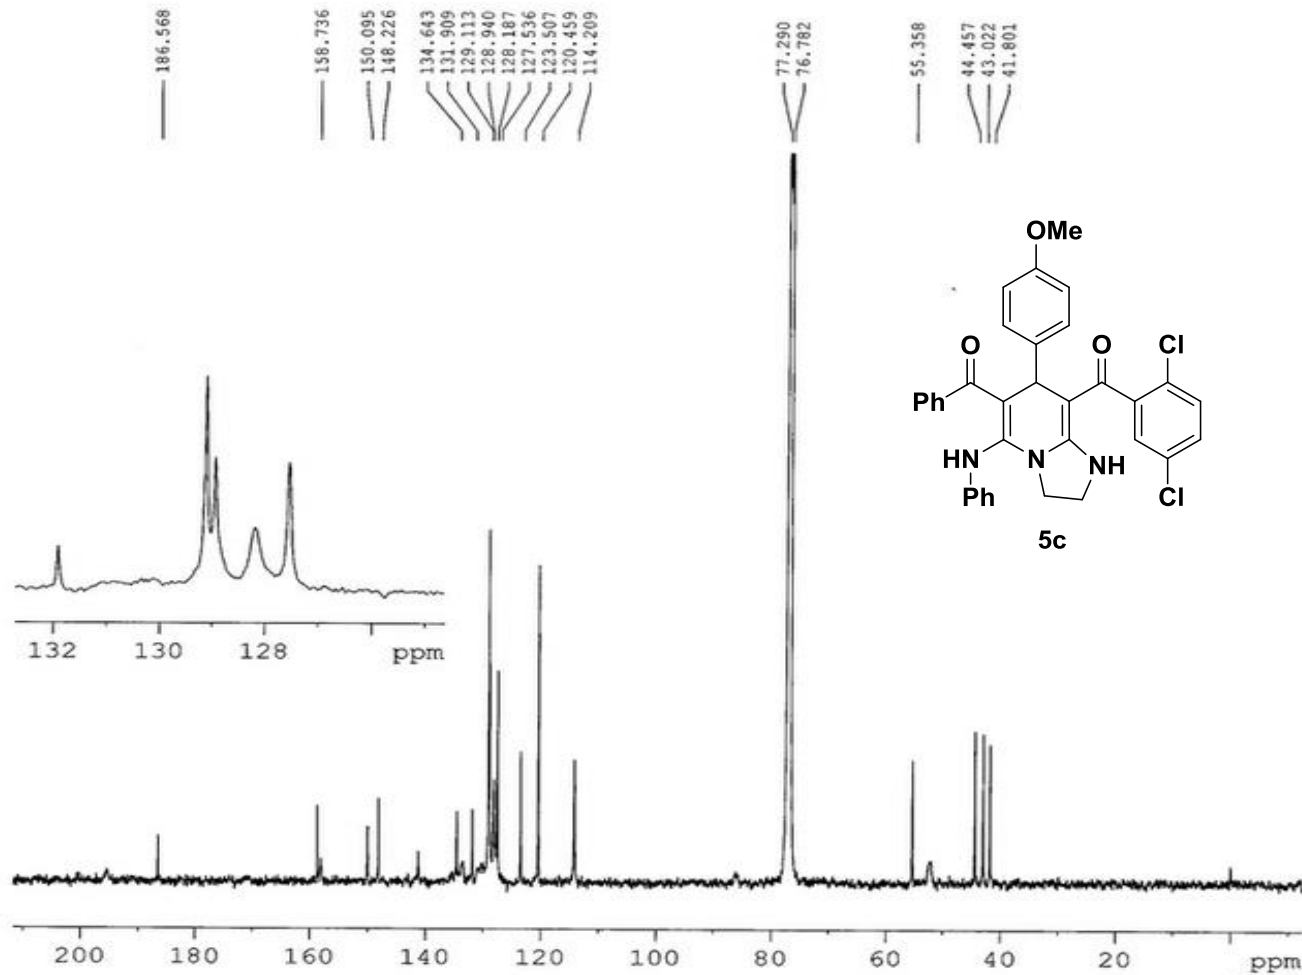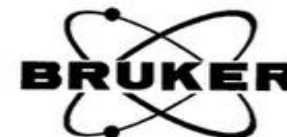

Current Data Parameters  
 NAME SP-E-2  
 EXPNO 2  
 PROCNO 1

F2 - Acquisition Parameters  
 Date\_ 20111220  
 Time\_ 21.01  
 INSTRUM av500  
 PROBHD 5 mm PABBO BB-  
 PULPROG zgpg30  
 TD 65536  
 SOLVENT CDCl3  
 NS 15020  
 DS 2  
 SWH 32679.738 Hz  
 FIDRES 0.498653 Hz  
 AQ 1.0027661 sec  
 RG 18400  
 DW 15.300 usec  
 DE 6.00 usec  
 TE 294.6 K  
 D1 2.00000000 sec  
 d11 0.03000000 sec  
 DELTA 1.89999998 sec  
 TDO 1

----- CHANNEL f1 -----  
 NUC1 13C  
 P1 9.60 usec  
 PL1 2.00 dB  
 SFO1 125.7464750 MHz

----- CHANNEL f2 -----  
 CPDPRG2 waltz16  
 NUC2 1H  
 PCPD2 80.00 usec  
 PL2 2.60 dB  
 PL12 17.66 dB  
 PL13 17.66 dB  
 SFO2 500.0355000 MHz

F2 - Processing parameters  
 SI 32768  
 SF 125.7326387 MHz  
 WDW EM  
 SSB 0  
 LB 6.00 Hz  
 CB 0  
 PC 2.00

SP-E-31 1H 1D 2013 05 08

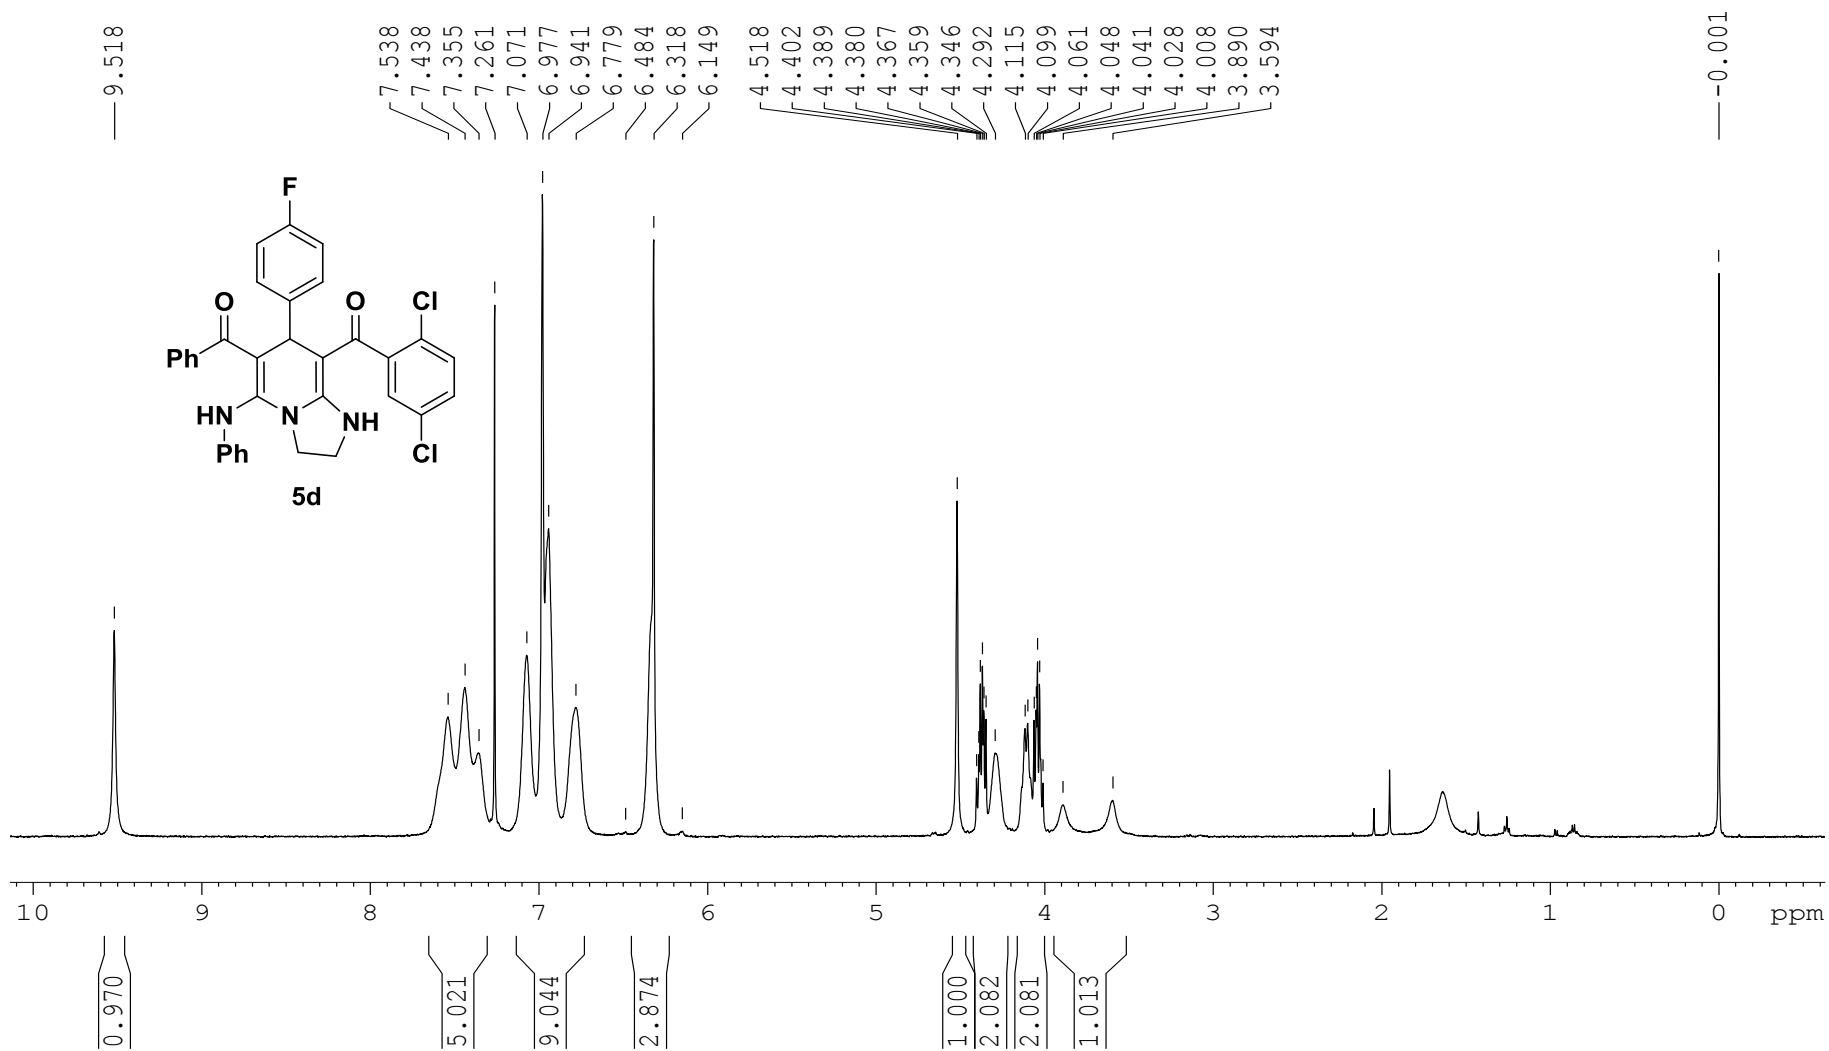

sp-e-31 13C 2013 05 07

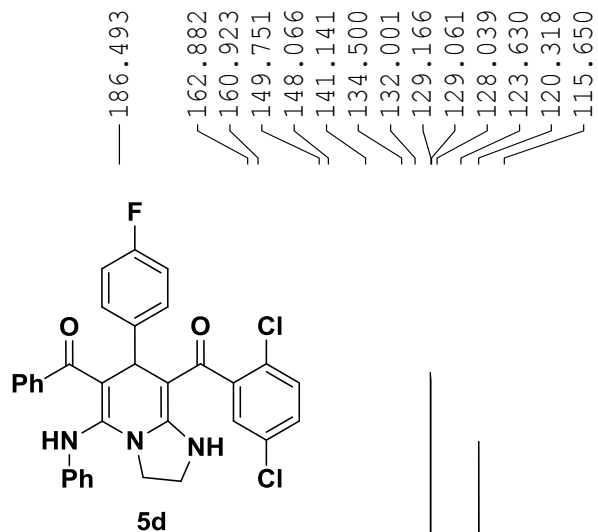

186.493  
162.882  
160.923  
149.751  
148.066  
141.141  
134.500  
132.001  
129.166  
129.061  
128.039  
123.630  
120.318  
115.650

44.498  
43.048  
41.878

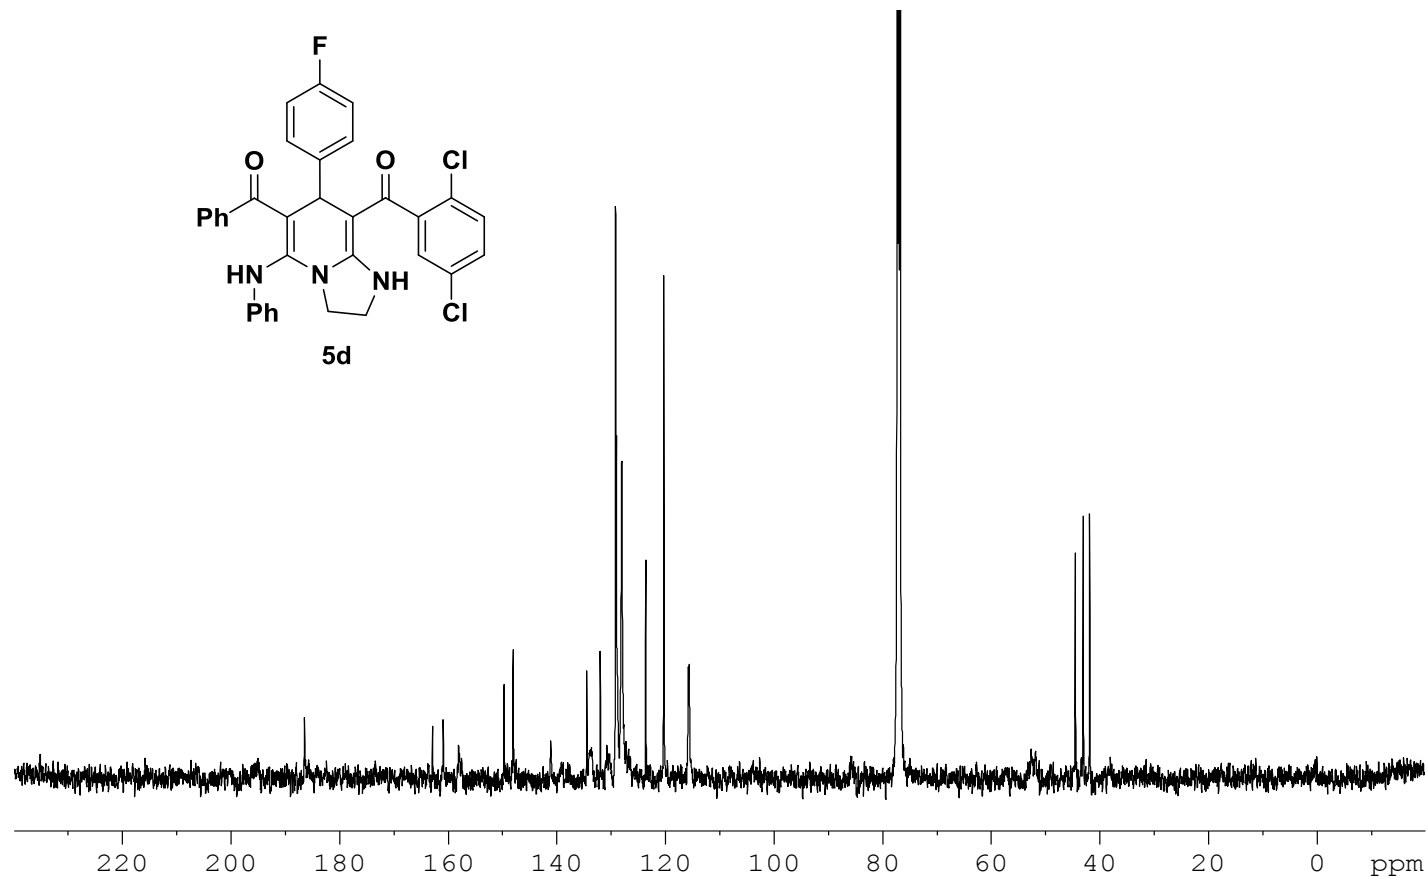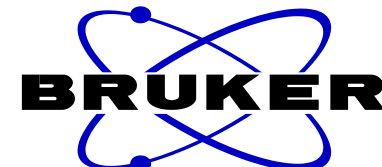

```
NAME          SP-E-31
EXPNO          2
PROCNO         1
Date_          20130509
Time           18.28
INSTRUM        spect
PROBHD         5 mm PABBO BB-
PULPROG        zgpg30
TD             65536
SOLVENT        CDCl3
NS             1278
DS             2
SWH            32679.738 Hz
FIDRES         0.498653 Hz
AQ            1.0027661 sec
RG            1820
DW            15.300 usec
DE            6.00 usec
TE            299.0 K
D1            2.00000000 sec
d11           0.03000000 sec
DELTA         1.89999998 sec
TD0           20

===== CHANNEL f1 =====
NUC1           13C
P1            12.20 usec
PL1           3.00 dB
SFO1          125.7464750 MHz

===== CHANNEL f2 =====
CPDPRG2        waltz16
NUC2           1H
PCPD2          80.00 usec
PL2            2.00 dB
PL12          17.70 dB
PL13          17.70 dB
SFO2          500.0355000 MHz
SI            32768
SF            125.7326392 MHz
WDW            EM
SSB            0
LB            6.00 Hz
GB            0
PC            1.00
```

SP-E-1

1H

2012 03 20

9.528

7.536  
7.432  
7.349  
7.262  
7.220  
7.079  
6.983  
6.792  
6.721  
6.347  
6.317

4.521  
4.402  
4.390  
4.381  
4.368  
4.360  
4.347  
4.278  
4.127  
4.113  
4.099  
4.065  
4.052  
4.045  
4.032  
4.012  
3.883

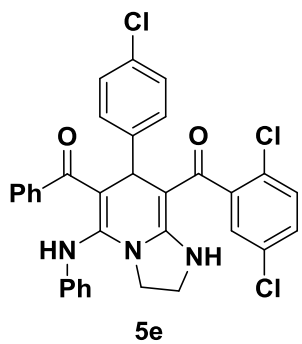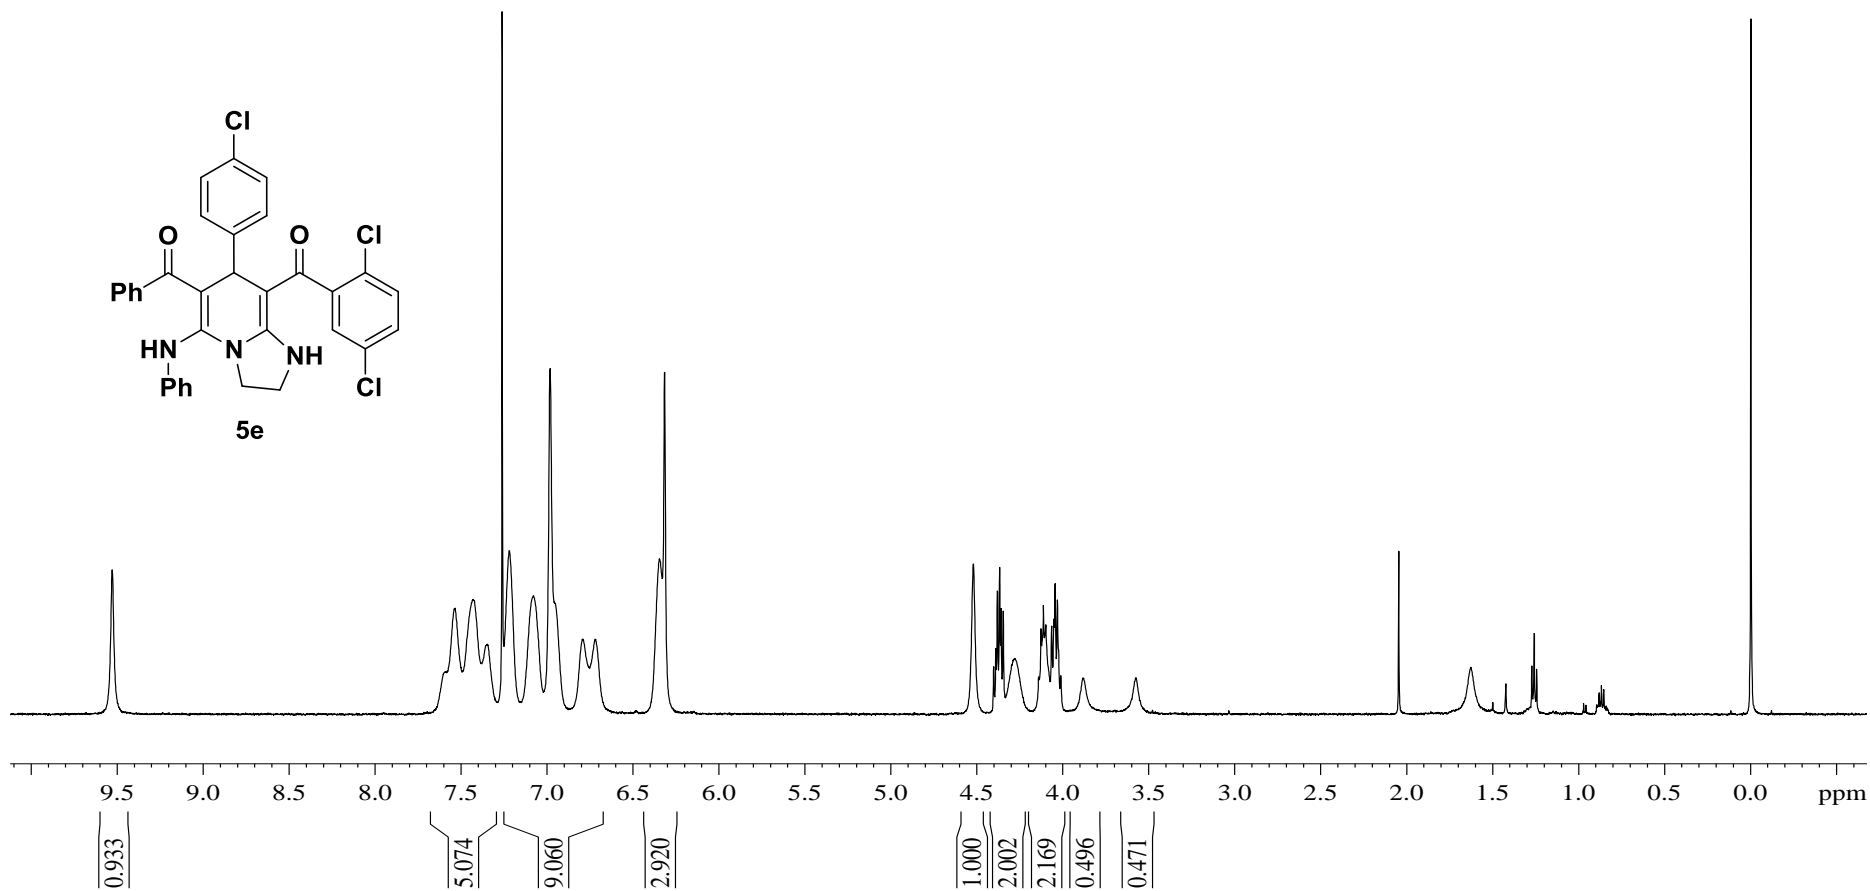

SP-E-1 13C 1D 2012 03 23

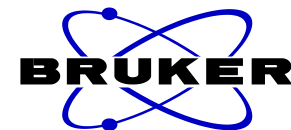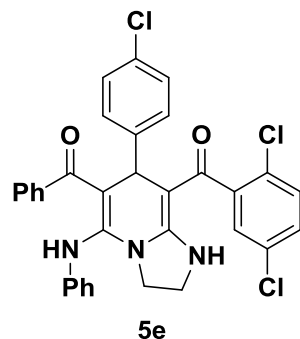

186.361  
149.614  
147.896  
134.267  
132.969  
131.953  
130.983  
129.146  
129.056  
127.834  
123.613  
120.224

44.416  
42.977  
41.845

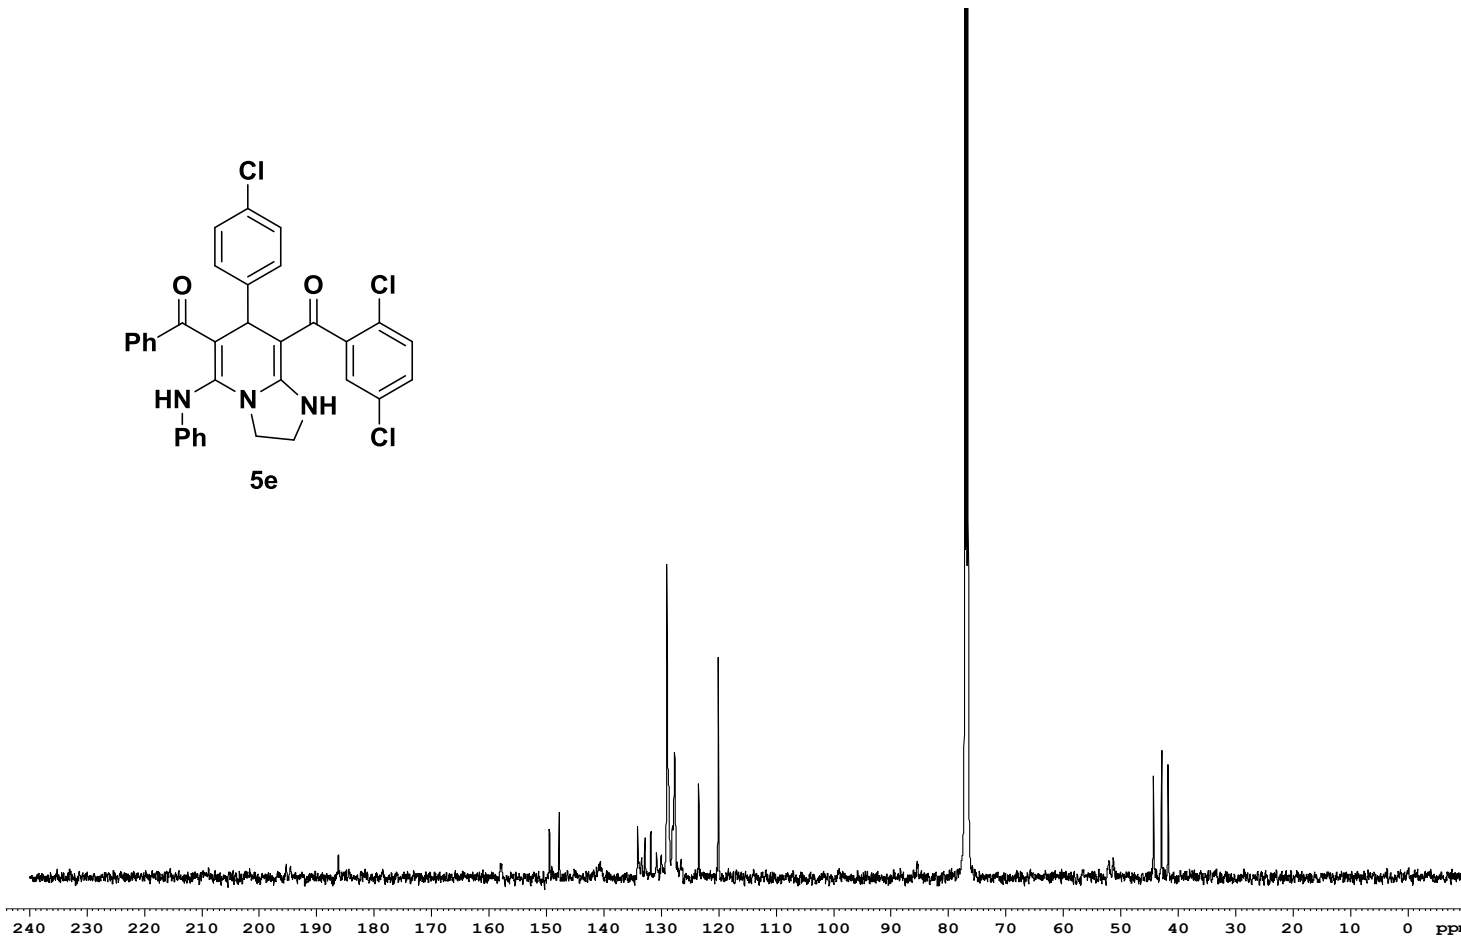

NAME SP-E-1  
EXPNO 2  
PROCNO 1  
Date\_ 20120323  
Time 18.12  
INSTRUM av500  
PROBHD 5 mm PABBO BB-  
PULPROG zgpg30  
TD 65536  
SOLVENT CDCl3  
NS 3572  
DS 2  
SWH 32679.738 Hz  
FIDRES 0.498653 Hz  
AQ 1.0027661 sec  
RG 14600  
DW 15.300 usec  
DE 6.00 usec  
TE 293.7 K  
D1 2.0000000 sec  
d11 0.0300000 sec  
DELTA 1.89999998 sec  
TD0 1

=====  
CHANNEL f1  
NUC1 13C  
P1 9.60 usec  
PL1 2.00 dB  
SFO1 125.7464750 MHz

=====  
CHANNEL f2  
CPDPRG2 waltz16  
NUC2 1H  
PCPD2 80.00 usec  
PL2 2.60 dB  
PL12 17.66 dB  
PL13 17.66 dB  
SFO2 500.0355000 MHz  
SI 32768  
SF 125.7326507 MHz  
WDW EM  
SSB 0  
LB 6.00 Hz  
GB 0  
PC 2.00

SP-E-32 1H 1D 2013 05 08

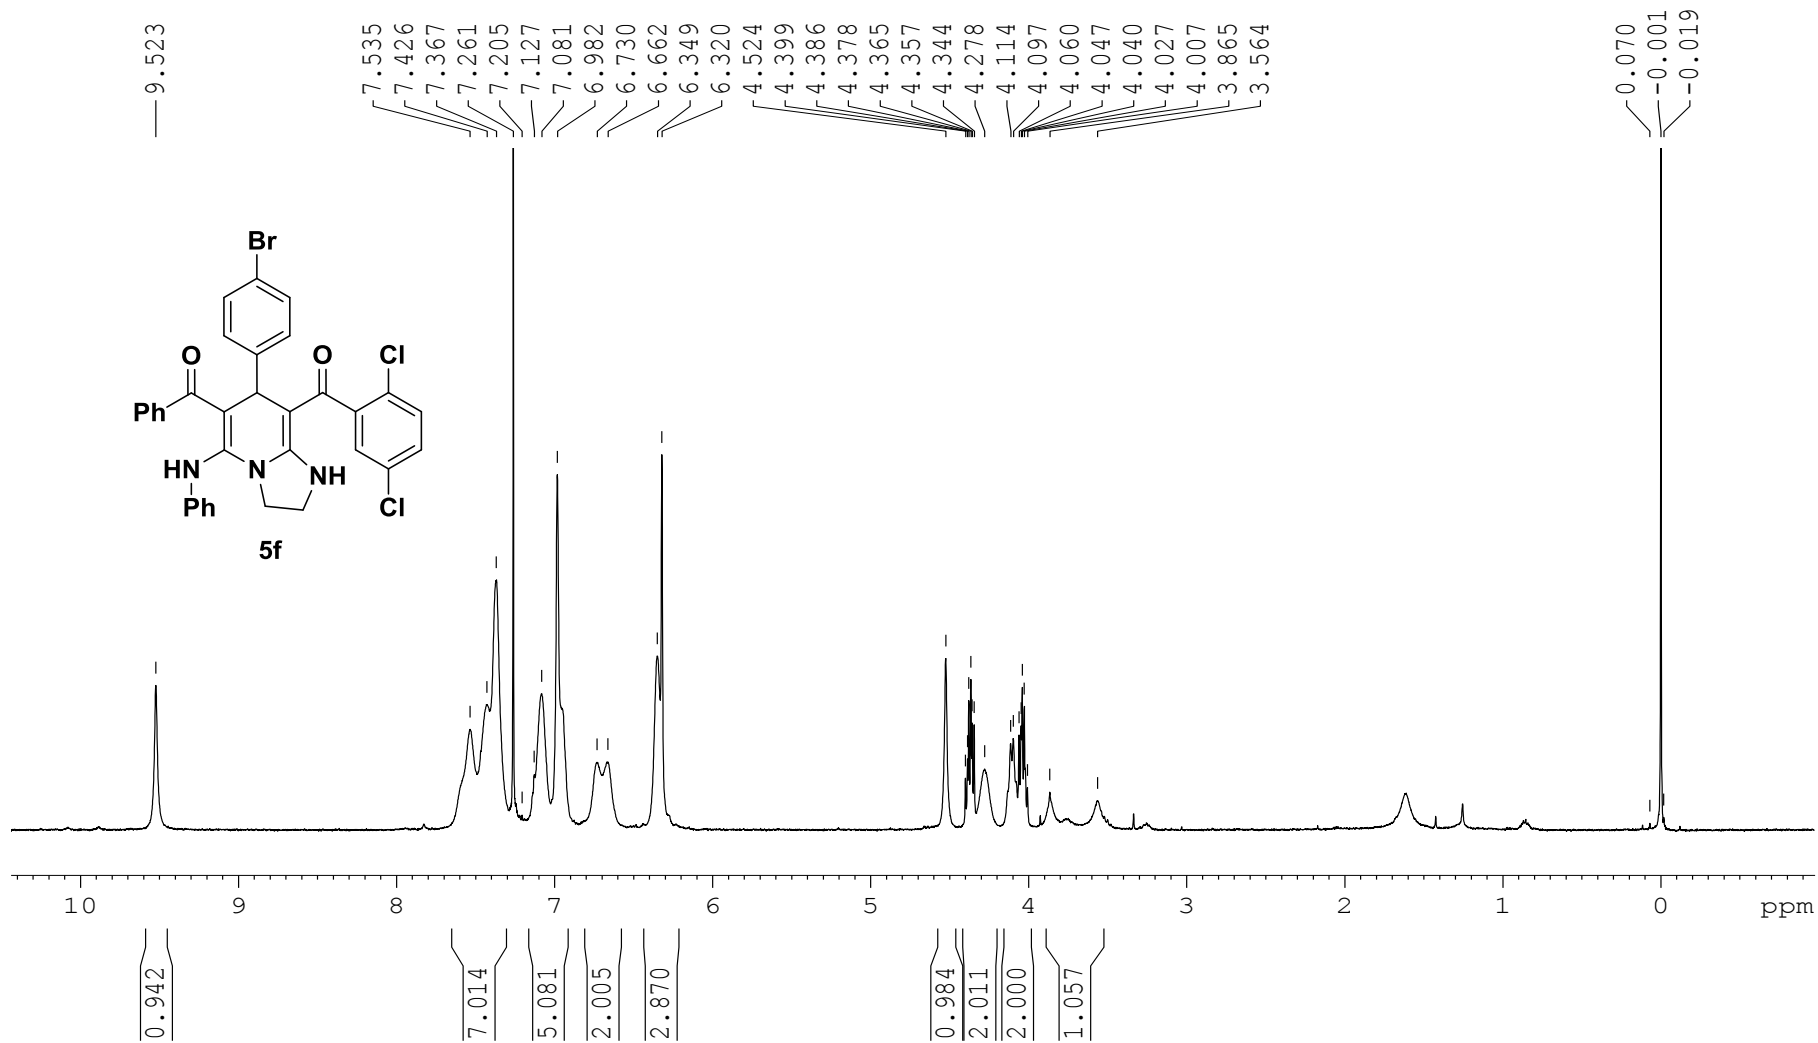



sp-e-32 13C 2013 05 09

186.451  
149.655  
148.025  
134.432  
131.942  
129.193  
129.100  
128.211  
123.659  
121.131  
120.317

44.509  
43.039  
42.031

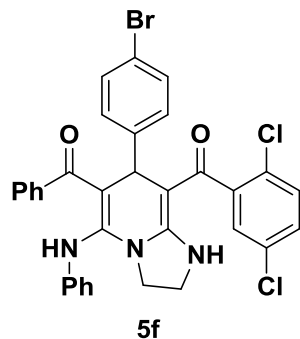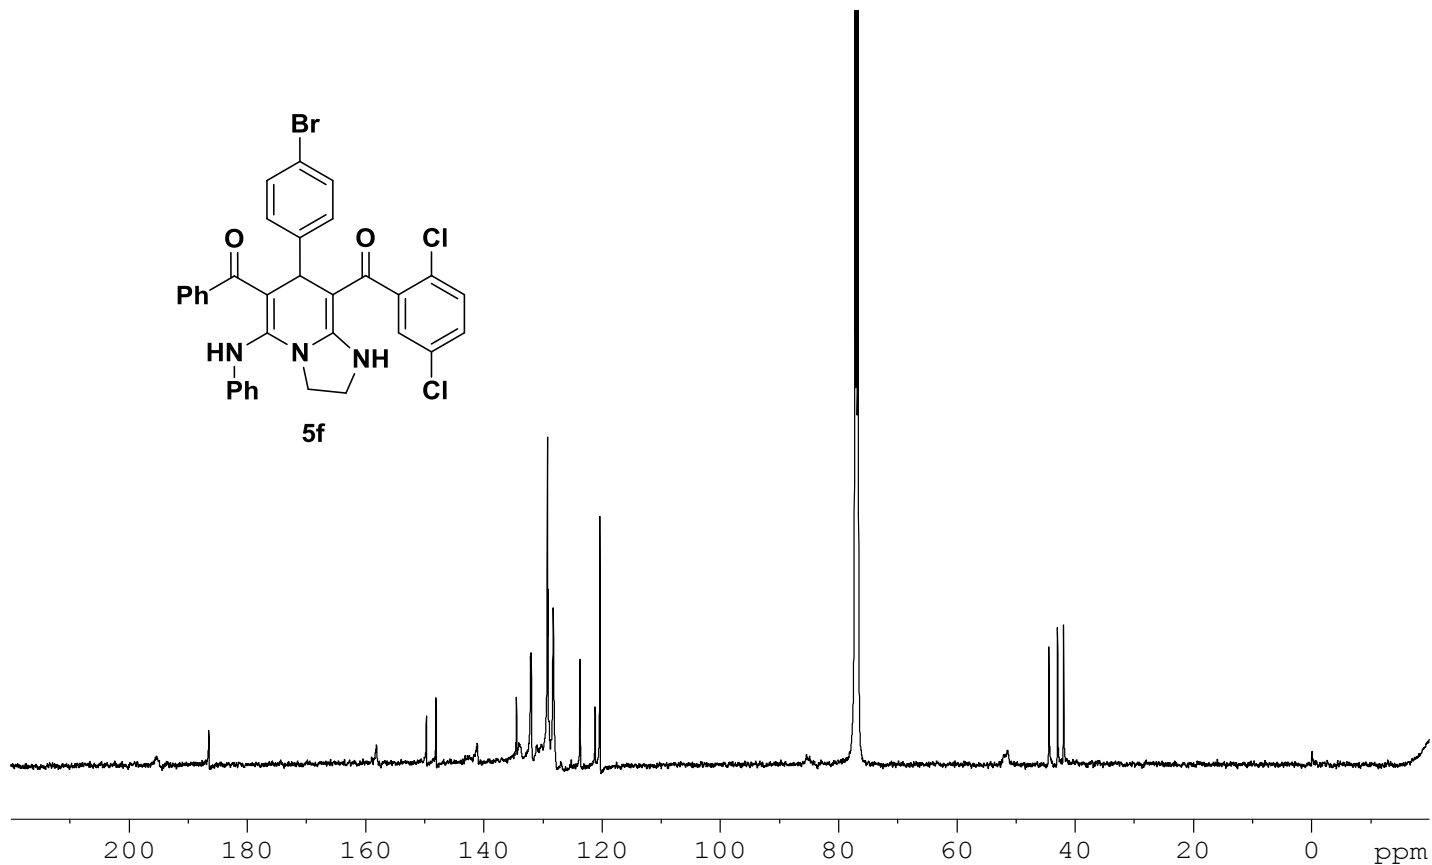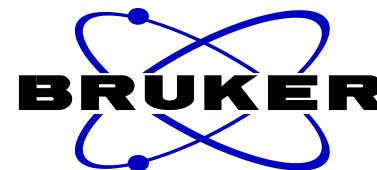

NAME SP-E-32  
EXPNO 2  
PROCNO 1  
Date\_ 20130509  
Time\_ 22.01  
INSTRUM spect  
PROBHD 5 mm PABBO BB-  
PULPROG zgpg30  
TD 65536  
SOLVENT CDC13  
NS 11882  
DS 2  
SWH 32679.738 Hz  
FIDRES 0.498653 Hz  
AQ 1.0027661 sec  
RG 1820  
DW 15.300 usec  
DE 6.00 usec  
TE 299.3 K  
D1 2.00000000 sec  
d11 0.03000000 sec  
DELTA 1.89999998 sec  
TD0 20

=====  
CHANNEL f1  
NUC1 13C  
P1 12.20 usec  
PL1 3.00 dB  
SFO1 125.7464750 MHz

=====  
CHANNEL f2  
CPDPRG2 waltz16  
NUC2 1H  
PCPD2 80.00 usec  
PL2 2.00 dB  
PL12 17.70 dB  
PL13 17.70 dB  
SFO2 500.0355000 MHz  
SI 32768  
SF 125.7326392 MHz  
WDW EM  
SSB 0  
LB 6.00 Hz  
GB 0  
PC 1.00

SP-E-4

1H 1D 2014 07 07

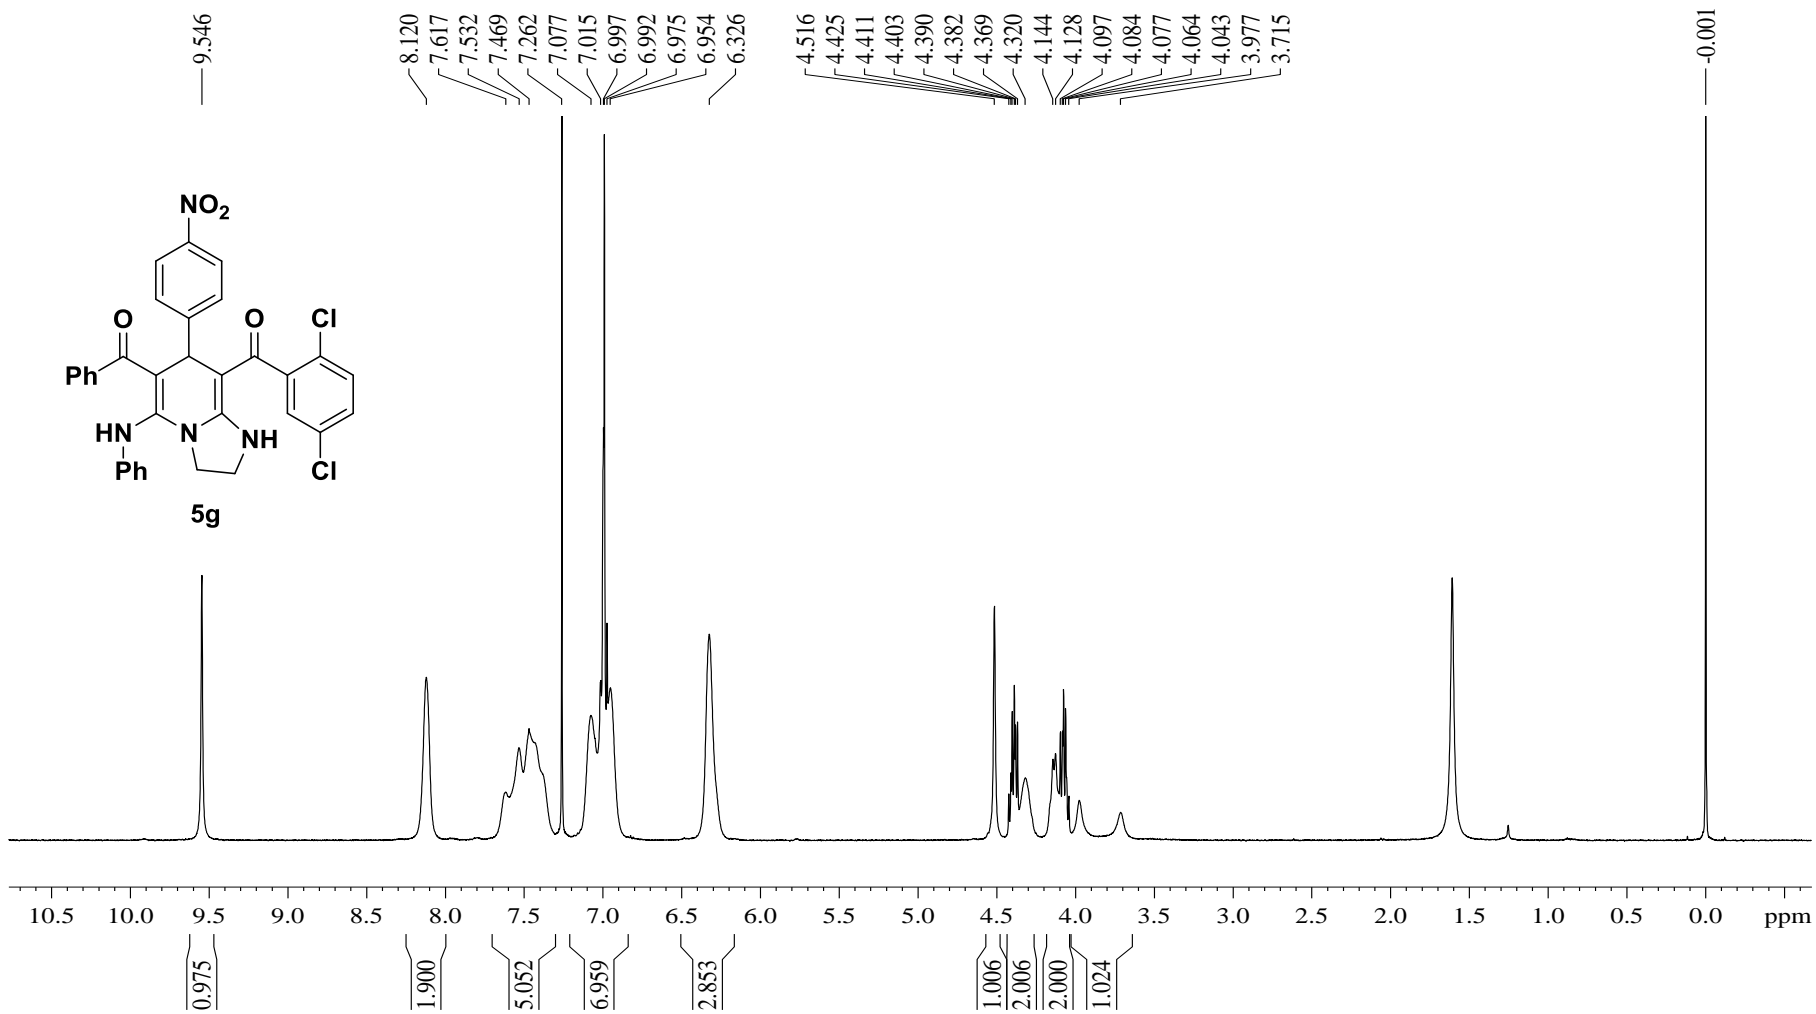

SP-E-4 13C 1D 2012 03 26

147.655  
147.009  
134.050  
132.156  
129.246  
127.551  
124.055  
123.814  
120.050

44.528  
43.036  
42.321

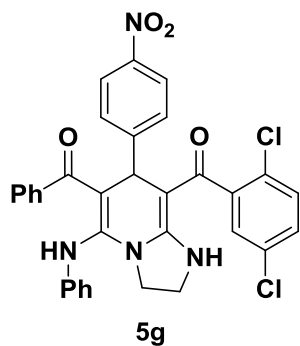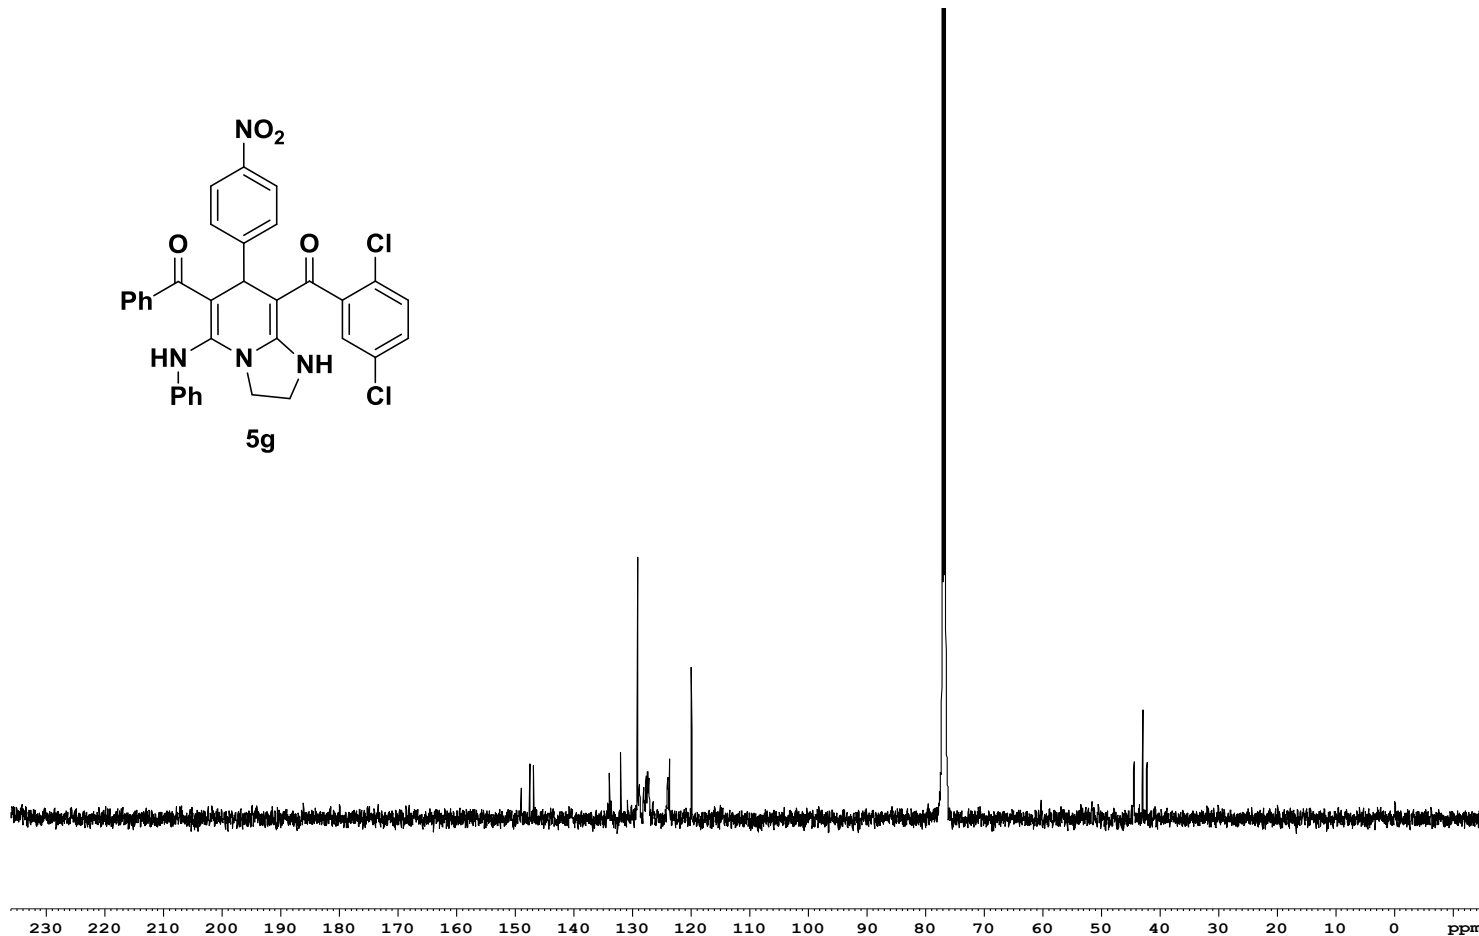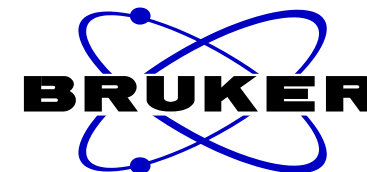

NAME SP-E-4  
EXPNO 2  
PROCNO 1  
Date\_ 20120326  
Time 16.42  
INSTRUM av500  
PROBHD 5 mm PABBO BB-  
PULPROG zgpg30  
TD 65536  
SOLVENT CDC13  
NS 2859  
DS 2  
SWH 32679.738 Hz  
FIDRES 0.498653 Hz  
AQ 1.0027661 sec  
RG 1150  
DW 15.300 usec  
DE 6.00 usec  
TE 293.4 K  
D1 2.00000000 sec  
d11 0.03000000 sec  
DELTA 1.89999998 sec  
TD0 1

===== CHANNEL f1 =====  
NUC1 13C  
P1 9.60 usec  
PL1 2.00 dB  
SFO1 125.7464750 MHz

===== CHANNEL f2 =====  
CPDPRG2 waltz16  
NUC2 1H  
PCPD2 80.00 usec  
PL2 2.60 dB  
PL12 17.66 dB  
PL13 17.66 dB  
SFO2 500.0355000 MHz  
SI 32768  
SF 125.7326507 MHz  
WDW EM  
SSB 0  
LB 3.00 Hz  
GB 0  
PC 2.00

SP-E-18

1H 1D 2014 07 11

9.482

7.732 7.547 7.372 7.260 7.246 7.231 7.064 7.049 7.034 6.949 6.930 6.901 6.802 6.786 6.229 6.213 4.704 4.372 4.360 4.351 4.339 4.330 4.318 4.245 4.225 4.208 4.188 4.141 4.126 4.123 4.112 4.103 4.087 4.067 4.051 4.039 4.030 4.018 4.010 3.998 3.534

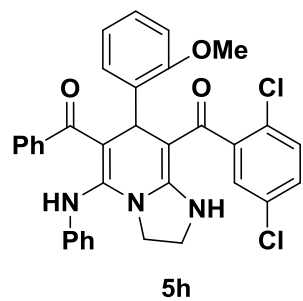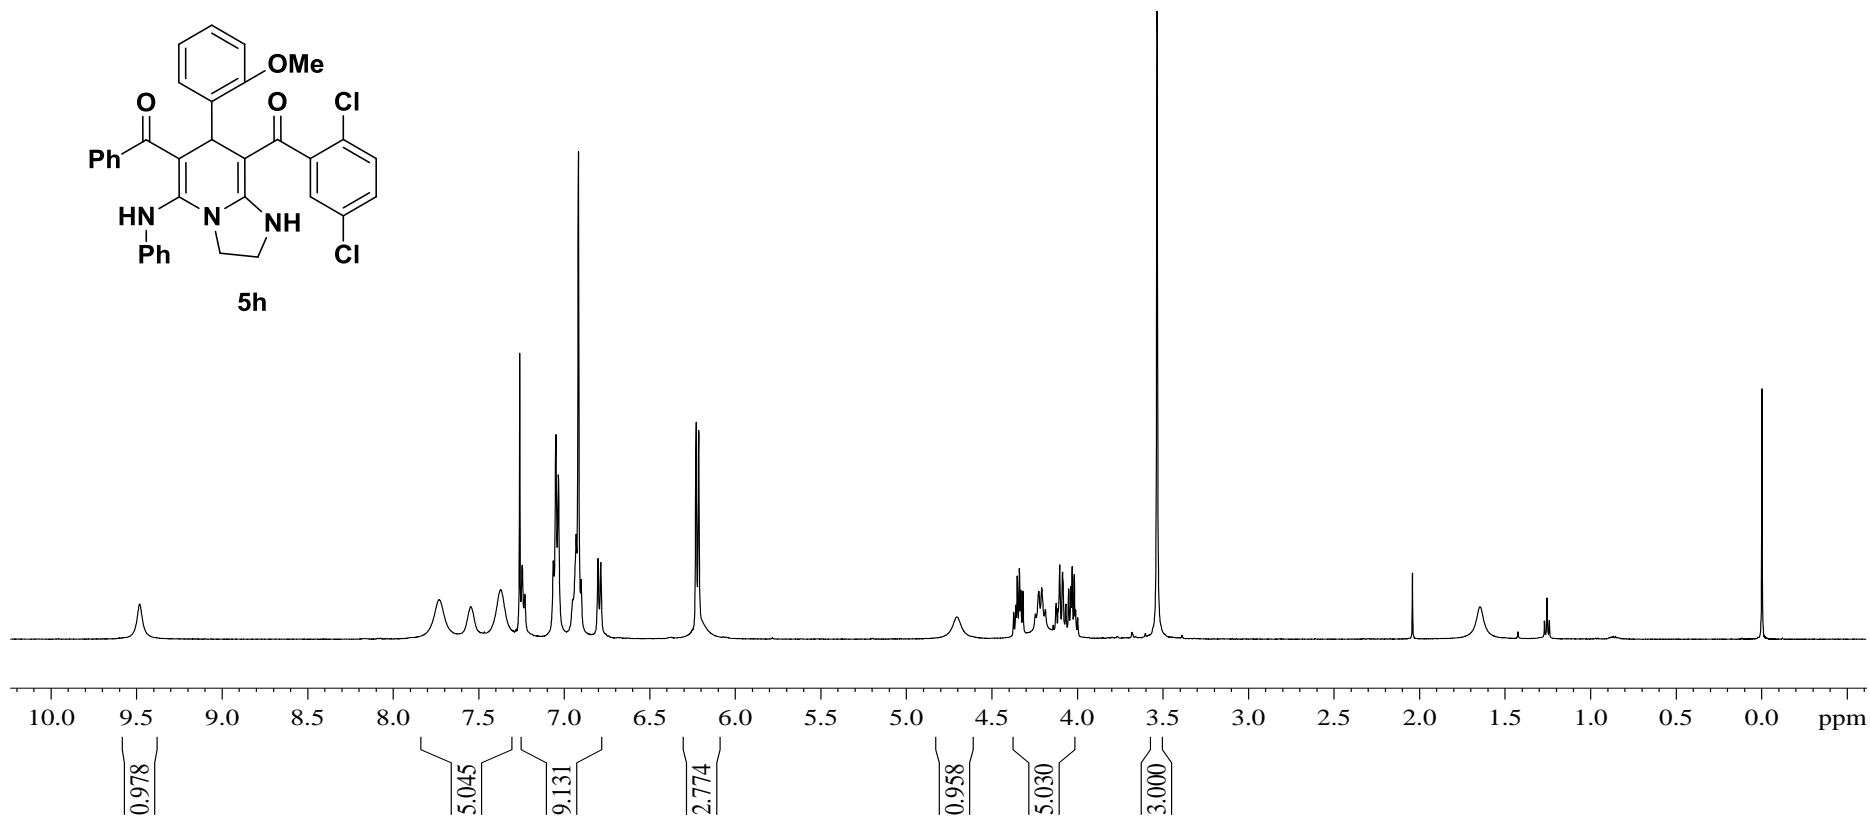

SP-E-18 13C 1D 2012 05 27

186.182  
158.934  
155.879  
150.835  
148.237  
141.039  
134.550  
131.555  
130.230  
128.787  
128.588  
128.427  
126.926  
123.307  
120.928  
120.306  
110.322

54.781  
50.128  
44.235  
43.071

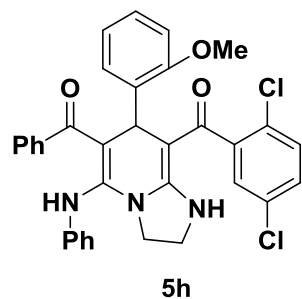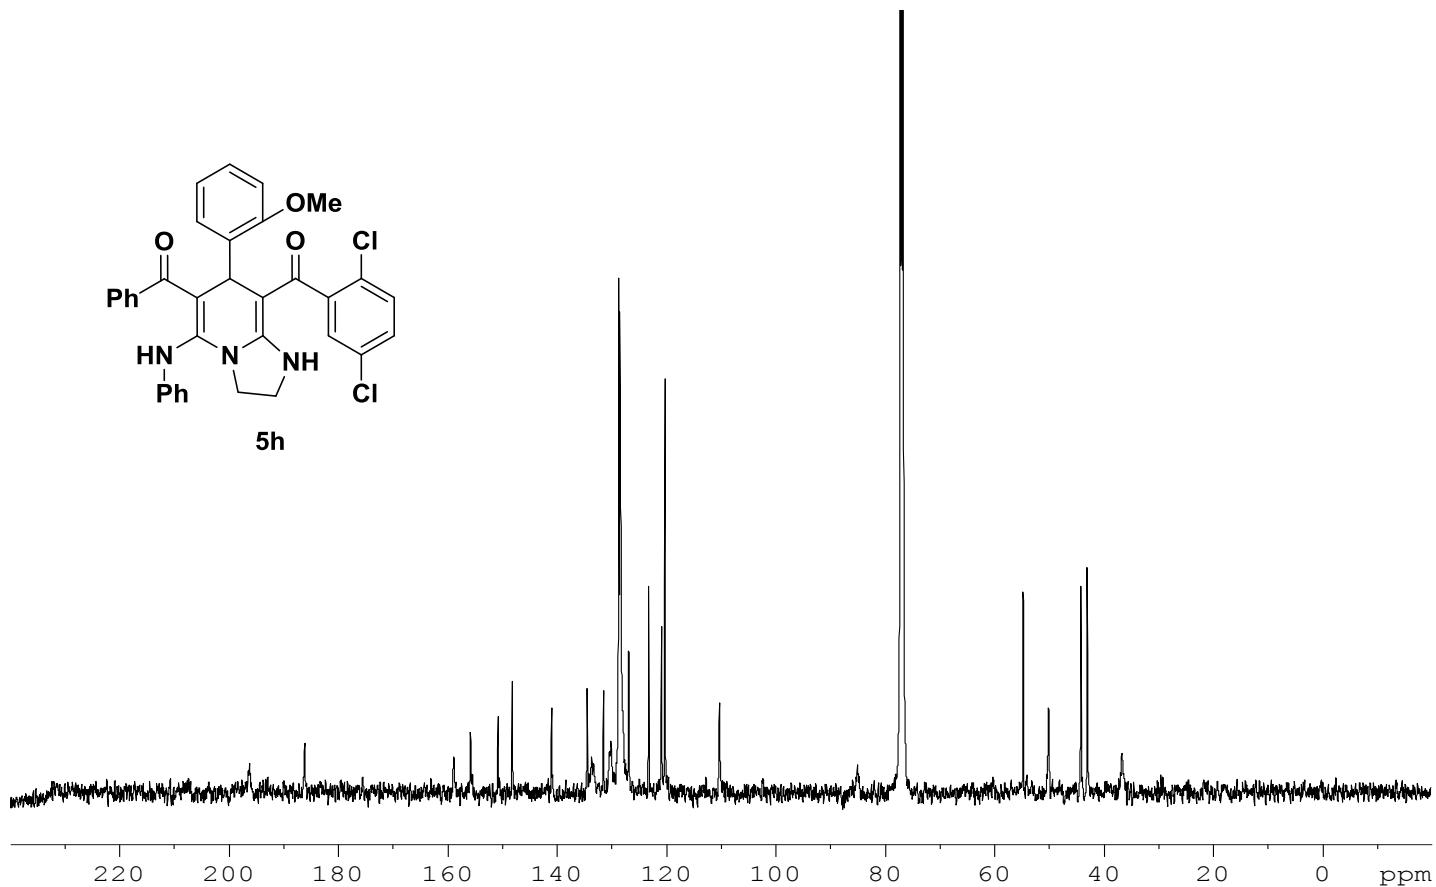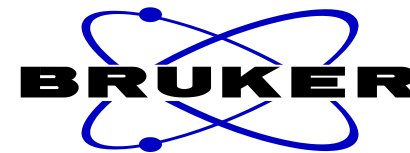

NAME SP-E-18  
EXPNO 2  
PROCNO 1  
Date\_ 20120527  
Time\_ 14.16  
INSTRUM av500  
PROBHD 5 mm PABBO BB-  
PULPROG zgpg30  
TD 65536  
SOLVENT CDCl3  
NS 890  
DS 2  
SWH 32679.738 Hz  
FIDRES 0.498653 Hz  
AQ 1.0027661 sec  
RG 2050  
DW 15.300 usec  
DE 6.00 usec  
TE 292.5 K  
D1 2.00000000 sec  
d11 0.03000000 sec  
DELTA 1.89999998 sec  
TD0 1

=====  
CHANNEL f1  
NUC1 13C  
P1 9.60 usec  
PL1 2.00 dB  
SFO1 125.7464750 MHz

=====  
CHANNEL f2  
CPDPRG2 waltz16  
NUC2 1H  
PCPD2 80.00 usec  
PL2 2.60 dB  
PL12 17.66 dB  
PL13 17.66 dB  
SFO2 500.0355000 MHz  
SI 32768  
SF 125.7326518 MHz  
WDW EM  
SSB 0  
LB 8.00 Hz  
GB 0  
PC 2.00

SP-E-8

1H 1D 2014 07 08

9.538

7.548 7.462 7.360 7.275 7.195 7.070 6.990 6.938 6.791 6.777 6.442 6.361 4.593 4.414 4.402 4.393 4.380 4.372 4.360 4.295 4.285 4.156 4.141 4.119 4.101 4.083 4.062 4.050 4.042 4.029 4.022 4.009 3.915 3.747 3.628 3.579

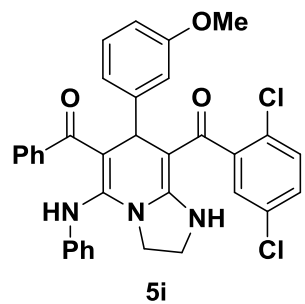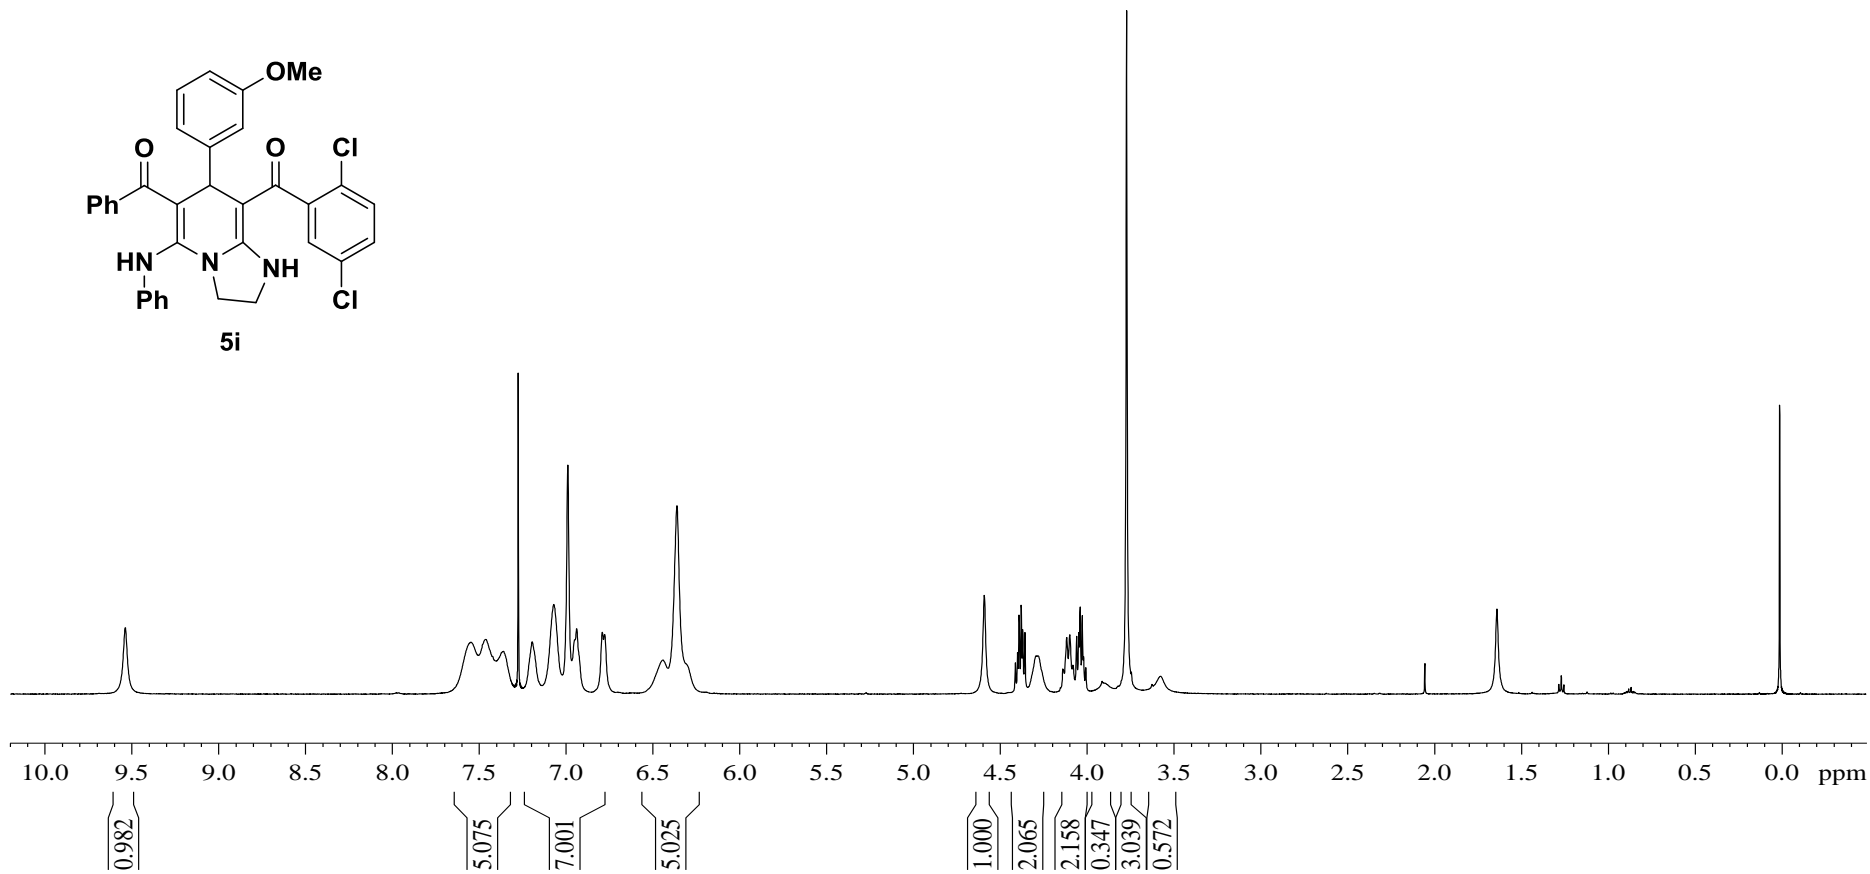

SP-E-8 13C 1D 2012 04 28

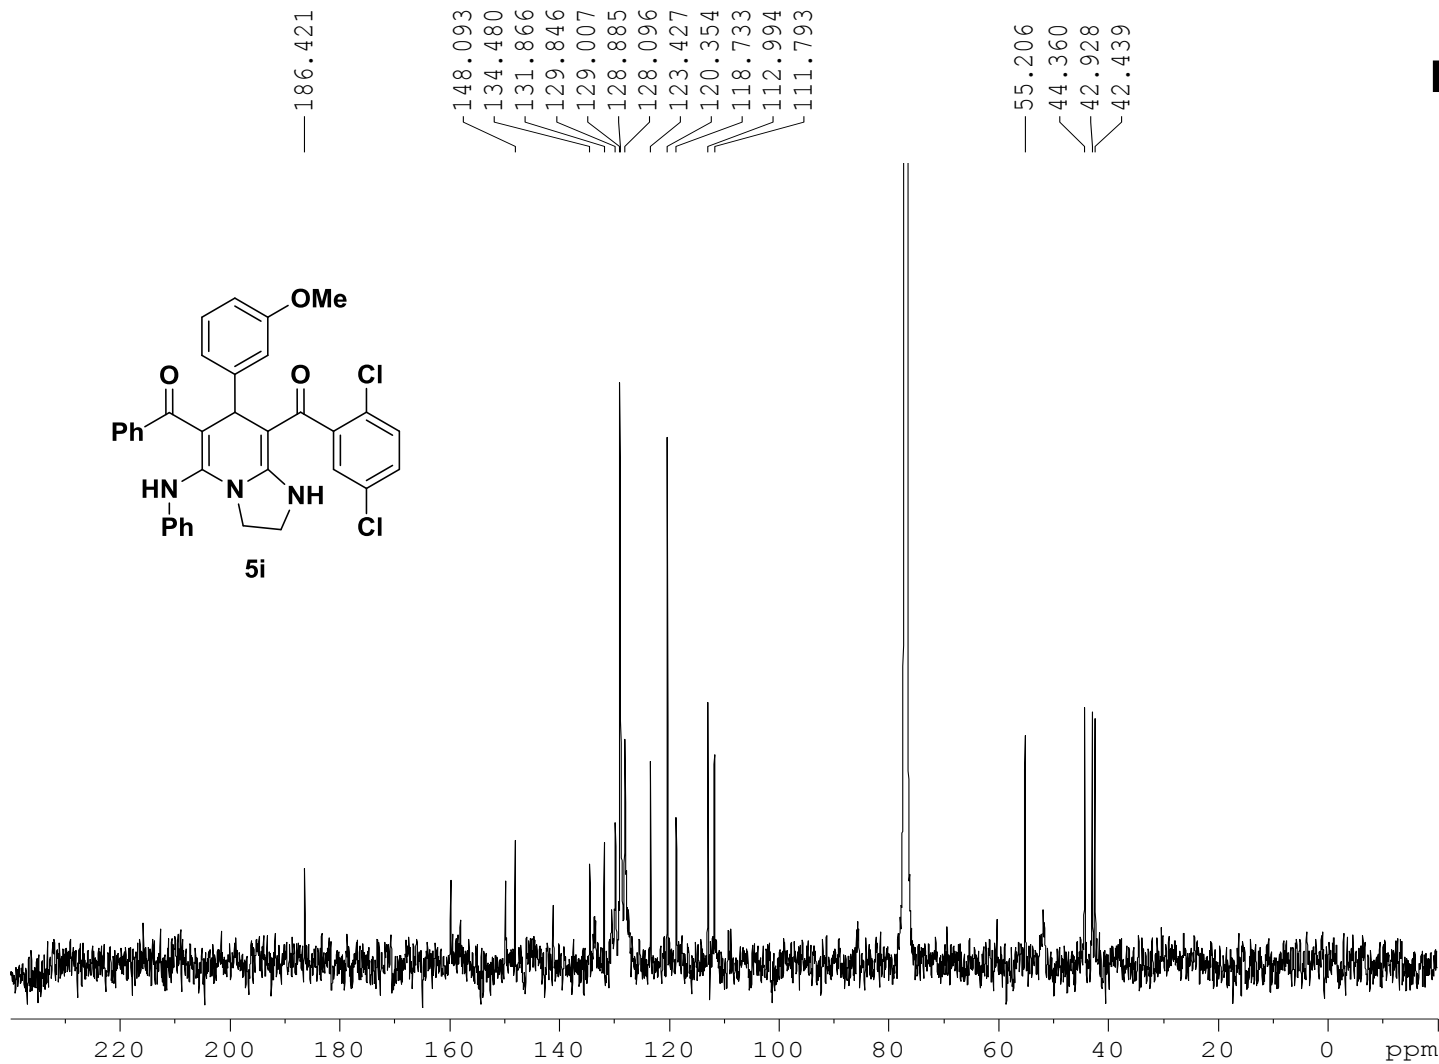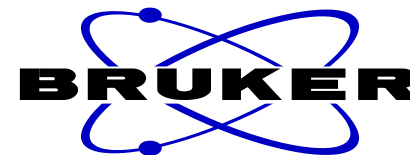

NAME SP-E-8  
EXPNO 2  
PROCNO 1  
Date\_ 20120428  
Time\_ 17.59  
INSTRUM av500  
PROBHD 5 mm PABBO BB-  
PULPROG zgpg30  
TD 65536  
SOLVENT CDCl3  
NS 994  
DS 2  
SWH 32679.738 Hz  
FIDRES 0.498653 Hz  
AQ 1.0027661 sec  
RG 1620  
DW 15.300 usec  
DE 6.00 usec  
TE 299.9 K  
D1 2.00000000 sec  
d11 0.03000000 sec  
DELTA 1.89999998 sec  
TD0 1

==== CHANNEL f1 =====  
NUC1 13C  
P1 9.60 usec  
PL1 2.00 dB  
SFO1 125.7464750 MHz

==== CHANNEL f2 =====  
CPDPRG2 waltz16  
NUC2 1H  
PCPD2 80.00 usec  
PL2 2.60 dB  
PL12 17.66 dB  
PL13 17.66 dB  
SFO2 500.0355000 MHz  
SI 32768  
SF 125.7326507 MHz  
WDW EM  
SSB 0  
LB 8.00 Hz  
GB 0  
PC 2.00

ZKL-J-2 1H 1D 2014 04 15

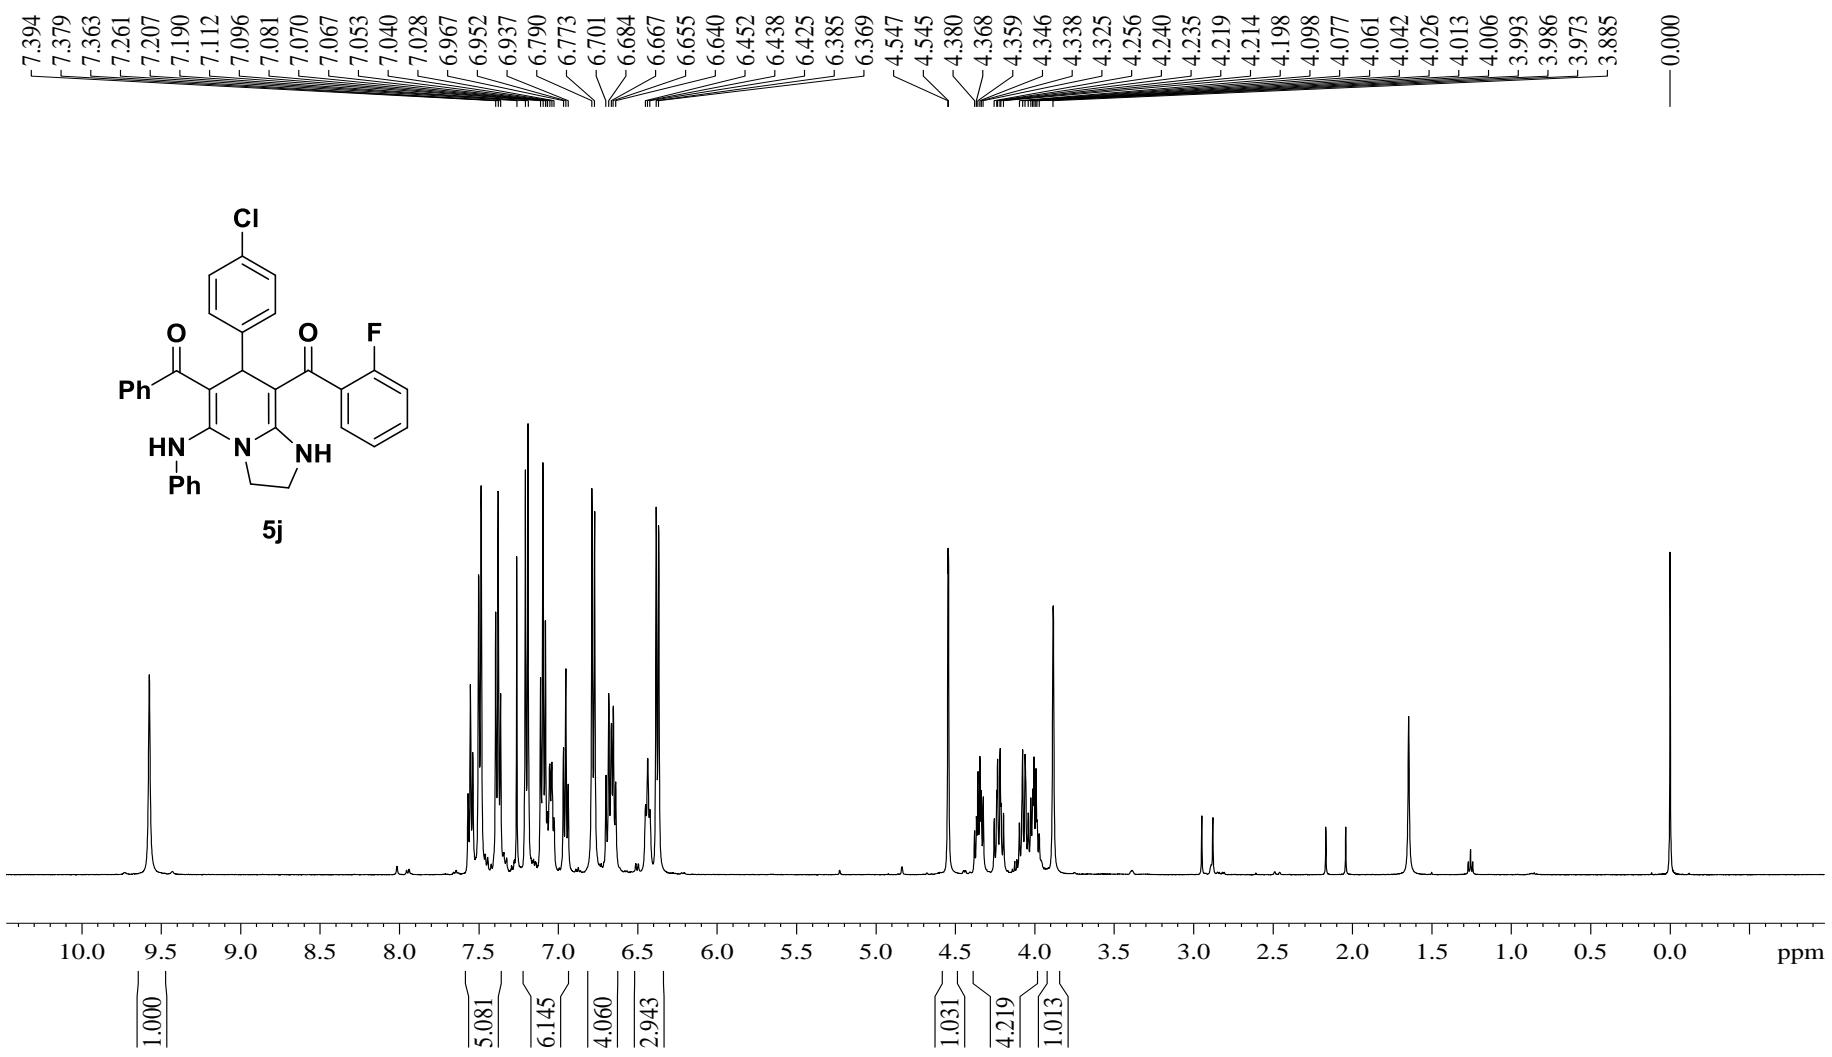



KL-J-2 13C 1D 2014 05 1

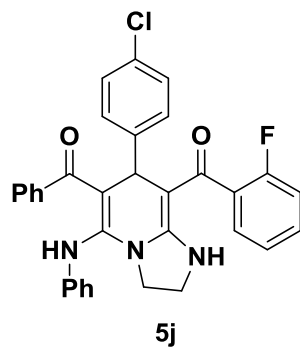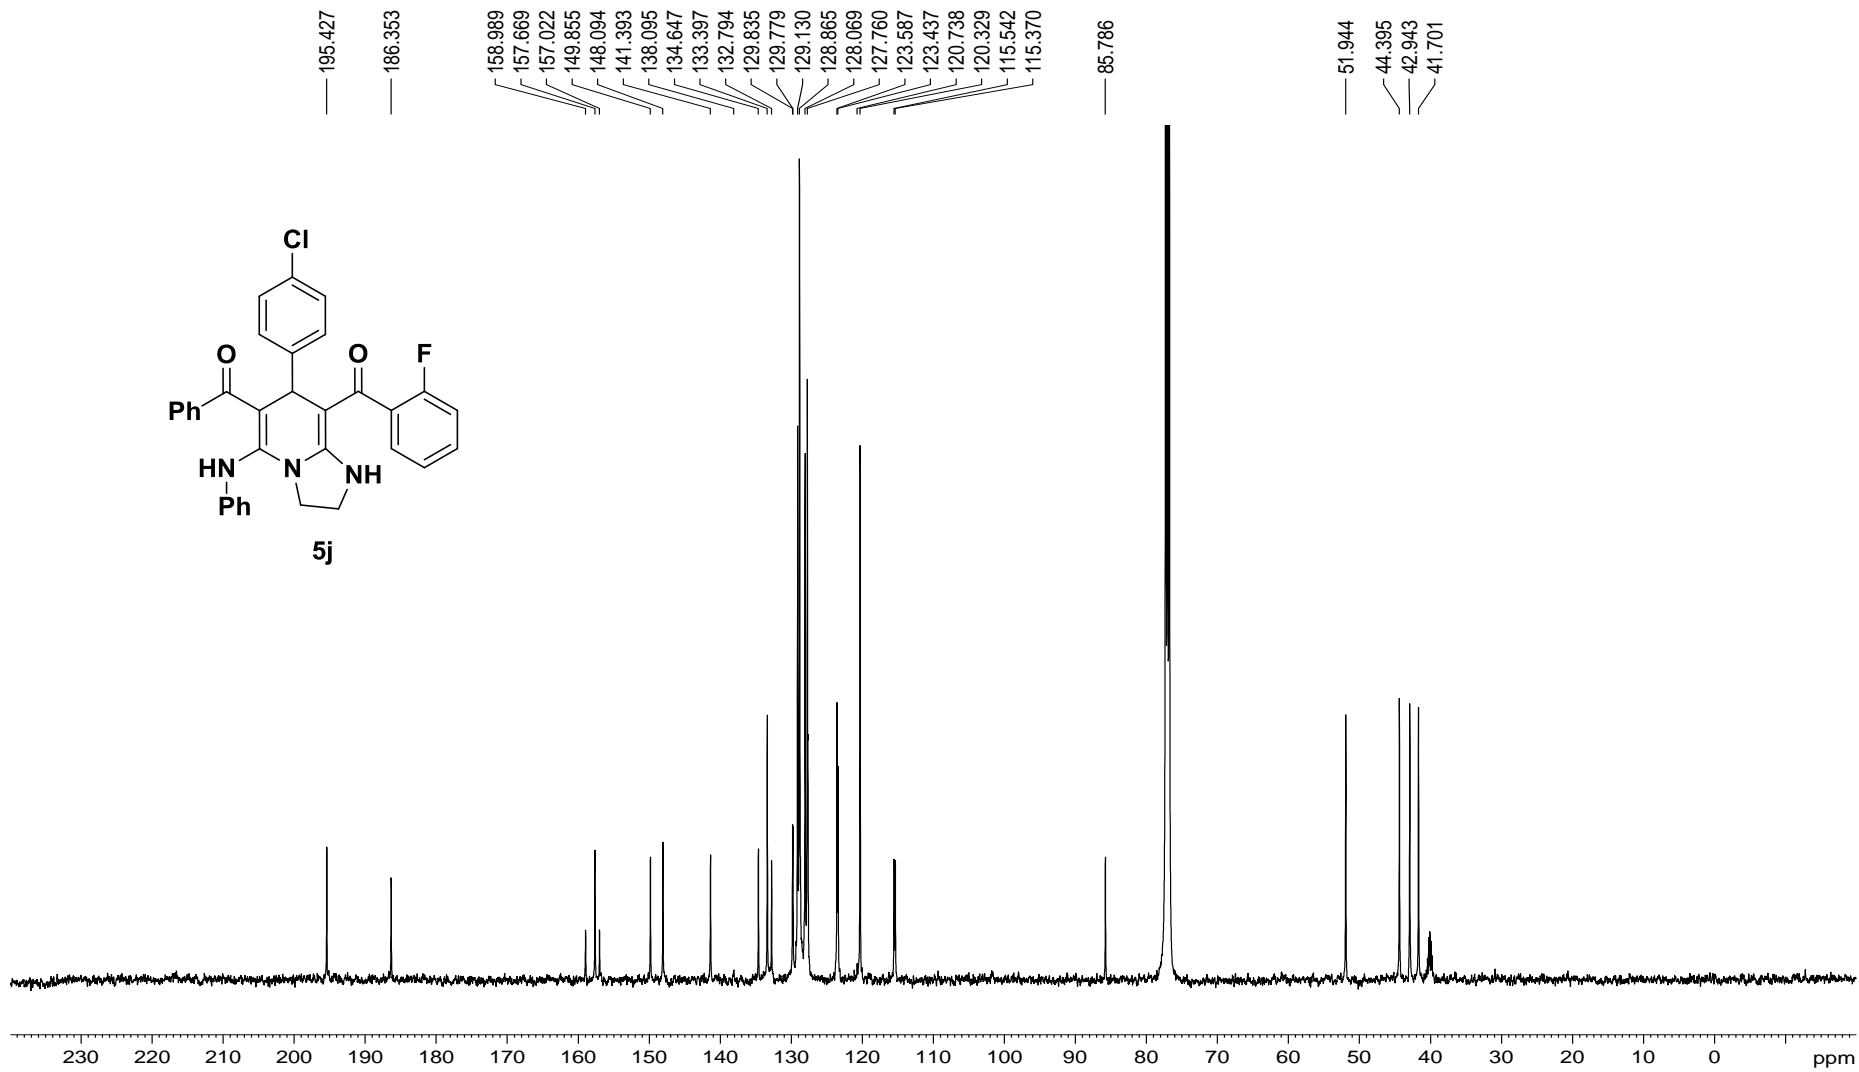

SP-E-6

1H 1D 2014 07 11

9.558

7.547  
7.428  
7.360  
7.308  
7.198  
7.181  
7.062  
7.016  
7.001  
6.945  
6.931  
6.917  
6.834  
6.745  
6.590  
6.331  
4.507  
4.389  
4.376  
4.367  
4.355  
4.346  
4.334  
4.270  
4.253  
4.127  
4.113  
4.090  
4.050  
4.037  
4.029  
4.017  
4.010  
3.997  
3.896  
3.667

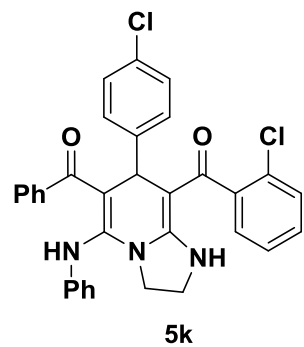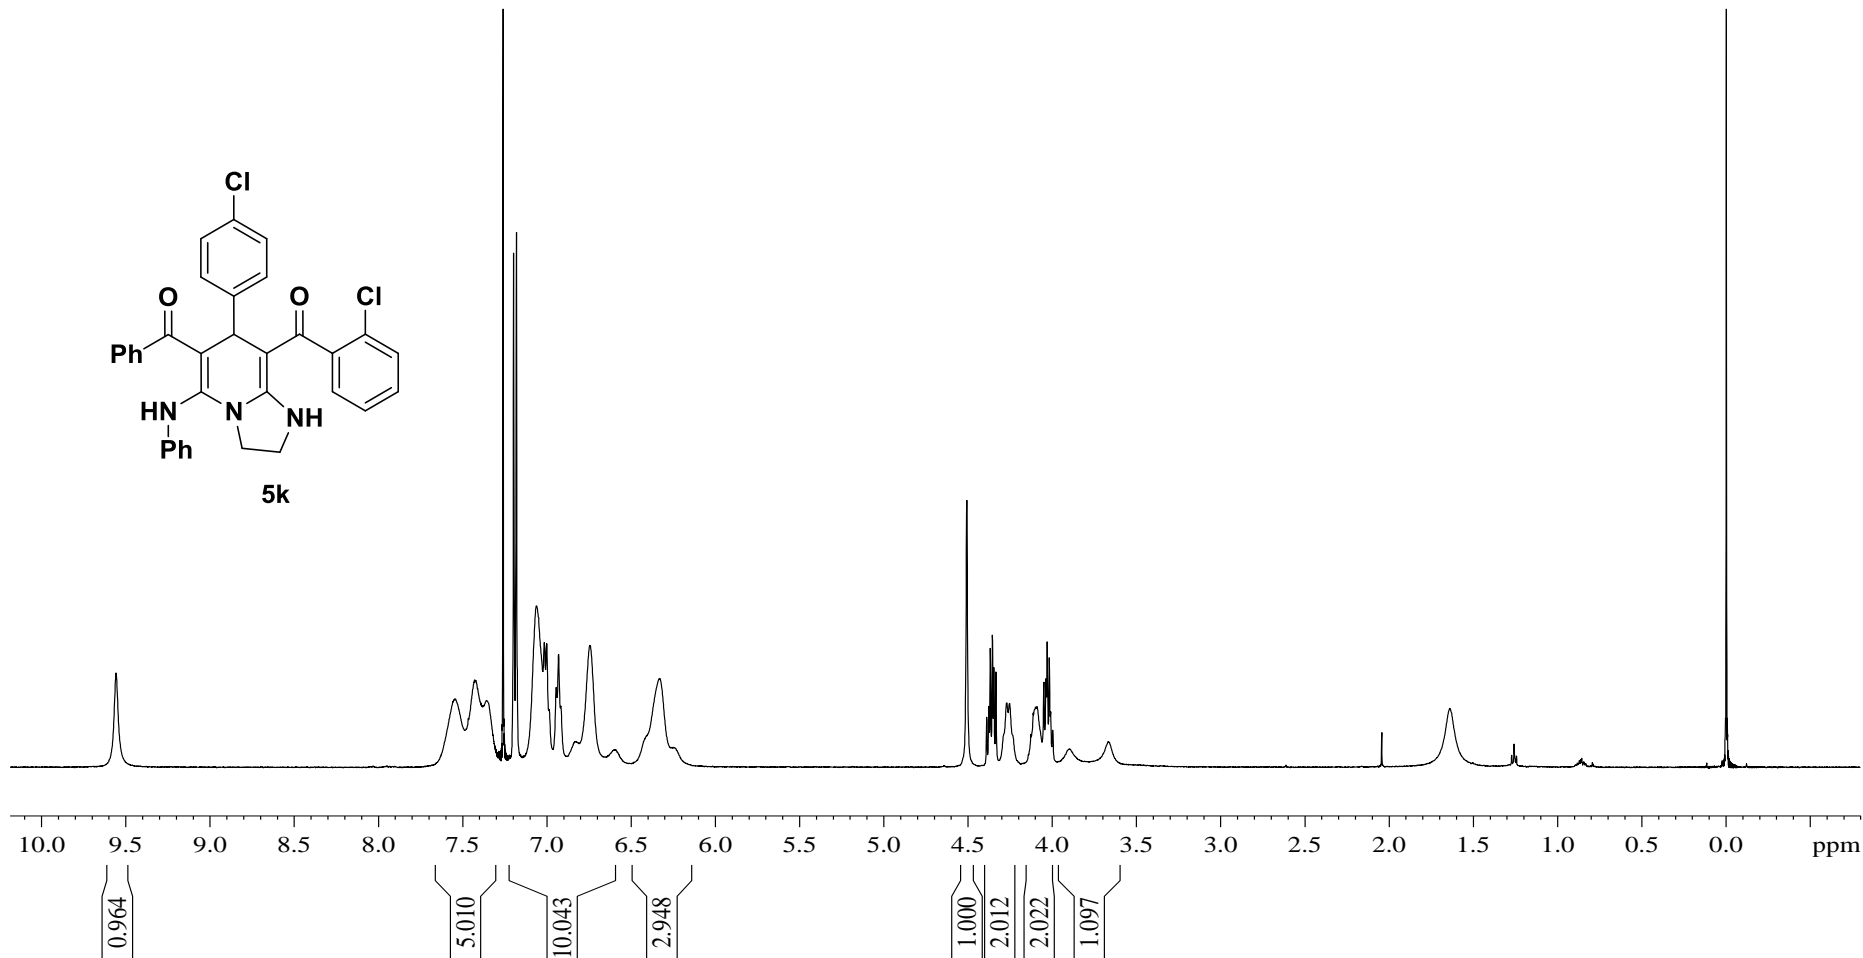

SP-E-6 13C 1D 2012 05 05

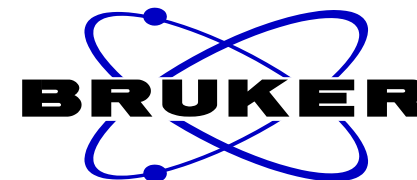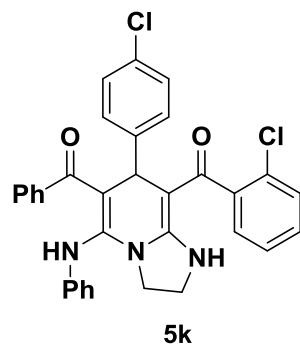

188.425  
157.829  
149.768  
148.125  
134.603  
133.458  
132.828  
129.091  
128.990  
128.822  
128.238  
127.900  
123.515  
120.342

51.874  
44.441  
42.957  
41.923

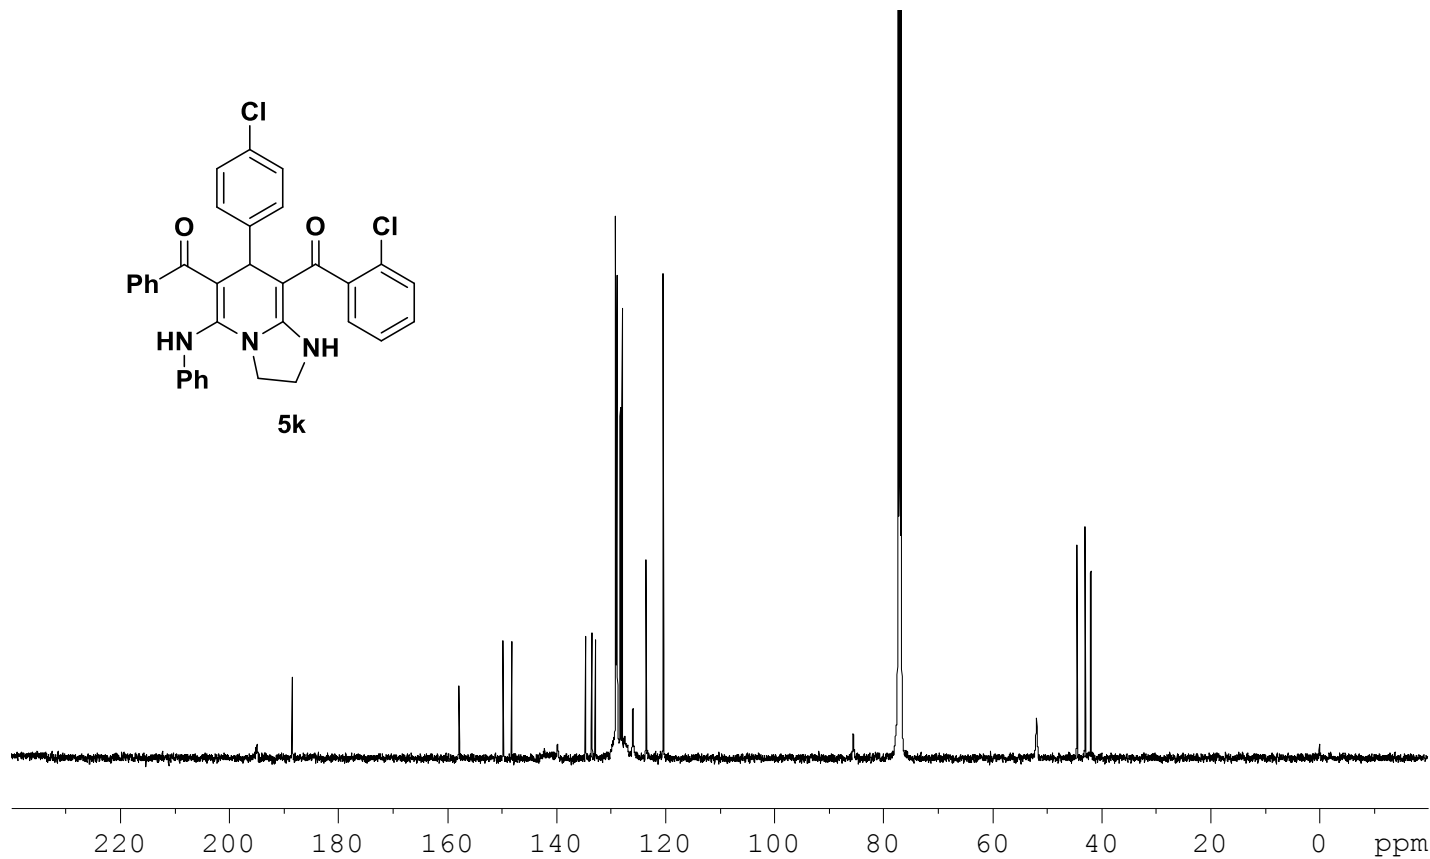

NAME SP-E-6  
EXPNO 2  
PROCNO 1  
Date\_ 20120506  
Time\_ 9.02  
INSTRUM av500  
PROBHD 5 mm PABBO BB-  
PULPROG zgpg30  
TD 65536  
SOLVENT CDCl3  
NS 12799  
DS 2  
SWH 32679.738 Hz  
FIDRES 0.498653 Hz  
AQ 1.0027661 sec  
RG 11500  
DW 15.300 usec  
DE 6.00 usec  
TE 301.8 K  
D1 2.00000000 sec  
d11 0.03000000 sec  
DELTA 1.89999998 sec  
TD0 1

===== CHANNEL f1 =====  
NUC1 13C  
P1 9.60 usec  
PL1 2.00 dB  
SFO1 125.7464750 MHz

===== CHANNEL f2 =====  
CPDPRG2 waltz16  
NUC2 1H  
PCPD2 80.00 usec  
PL2 2.60 dB  
PL12 17.66 dB  
PL13 17.66 dB  
SFO2 500.0355000 MHz  
SI 32768  
SF 125.7326440 MHz  
WDW EM  
SSB 0  
LB 3.00 Hz  
GB 0  
PC 2.00

ZKL-J-1 1H 1D 2014 04 15

9.569

7.558 7.435 7.341 7.251 7.249 7.246 7.244 7.241 7.200 7.183 7.050 6.927 6.870 6.734 6.633 6.368 6.300 6.234 4.501 4.499 4.393 4.380 4.371 4.359 4.351 4.338 4.273 4.114 4.056 4.044 4.036 4.024 4.003 3.891 3.644

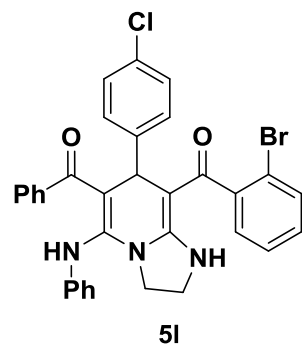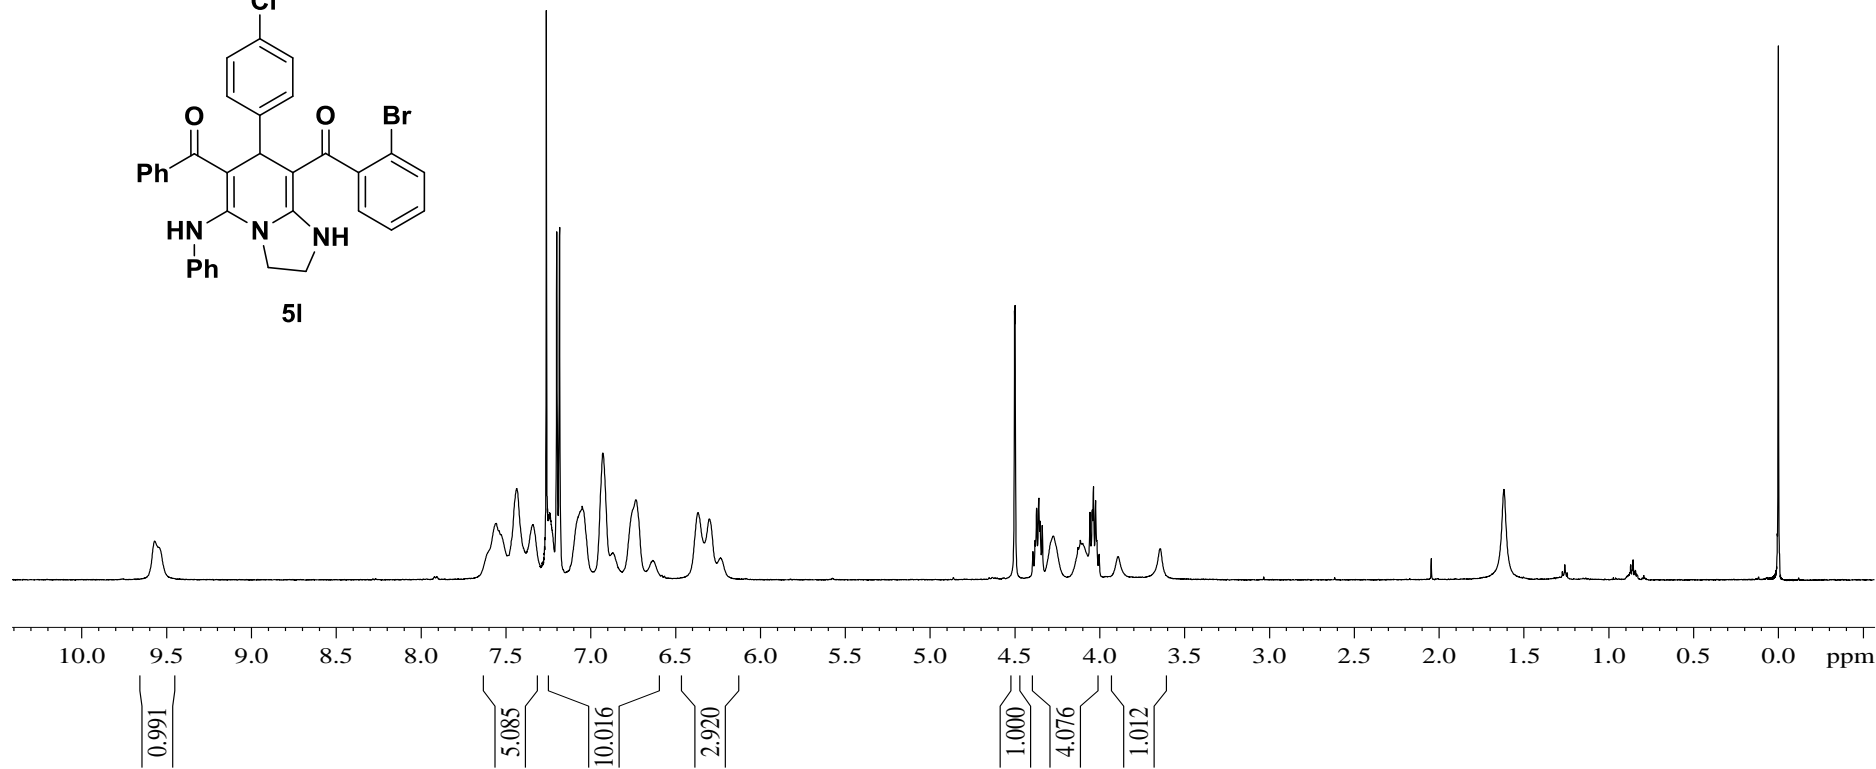

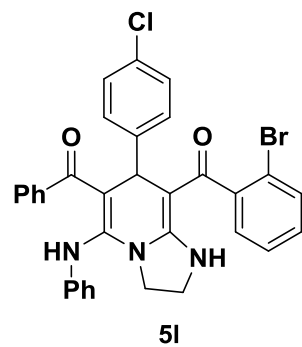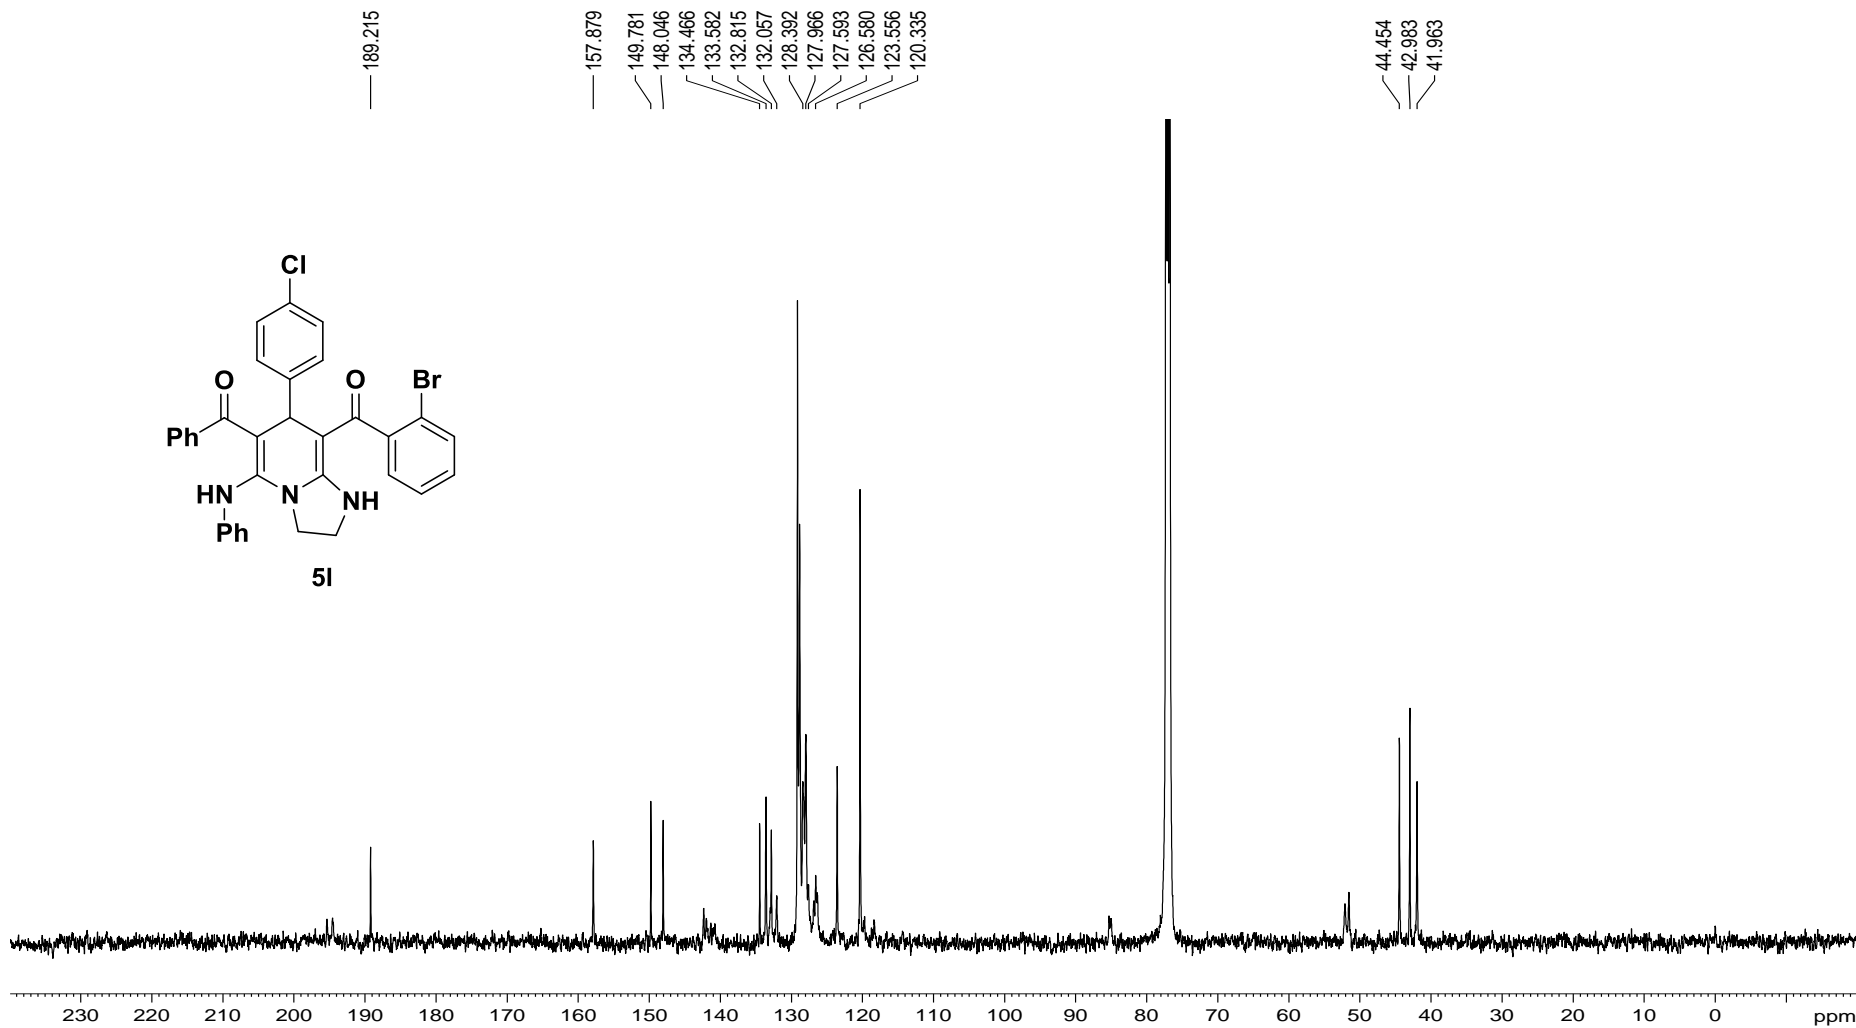

ZKL-J-3a 1H 1D 2014 06 09

9.578  
7.567  
7.553  
7.482  
7.395  
7.381  
7.191  
7.176  
7.075  
7.060  
7.045  
6.971  
6.956  
6.940  
6.934  
6.919  
6.904  
6.858  
6.843  
6.700  
6.605  
6.353  
6.340  
6.237  
6.223  
4.460  
4.390  
4.378  
4.369  
4.356  
4.348  
4.336  
4.288  
4.272  
4.267  
4.251  
4.230  
4.106  
4.086  
4.070  
4.050  
4.042  
4.029  
4.021  
4.009  
3.989  
3.793  
1.716

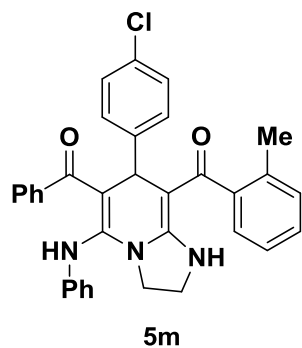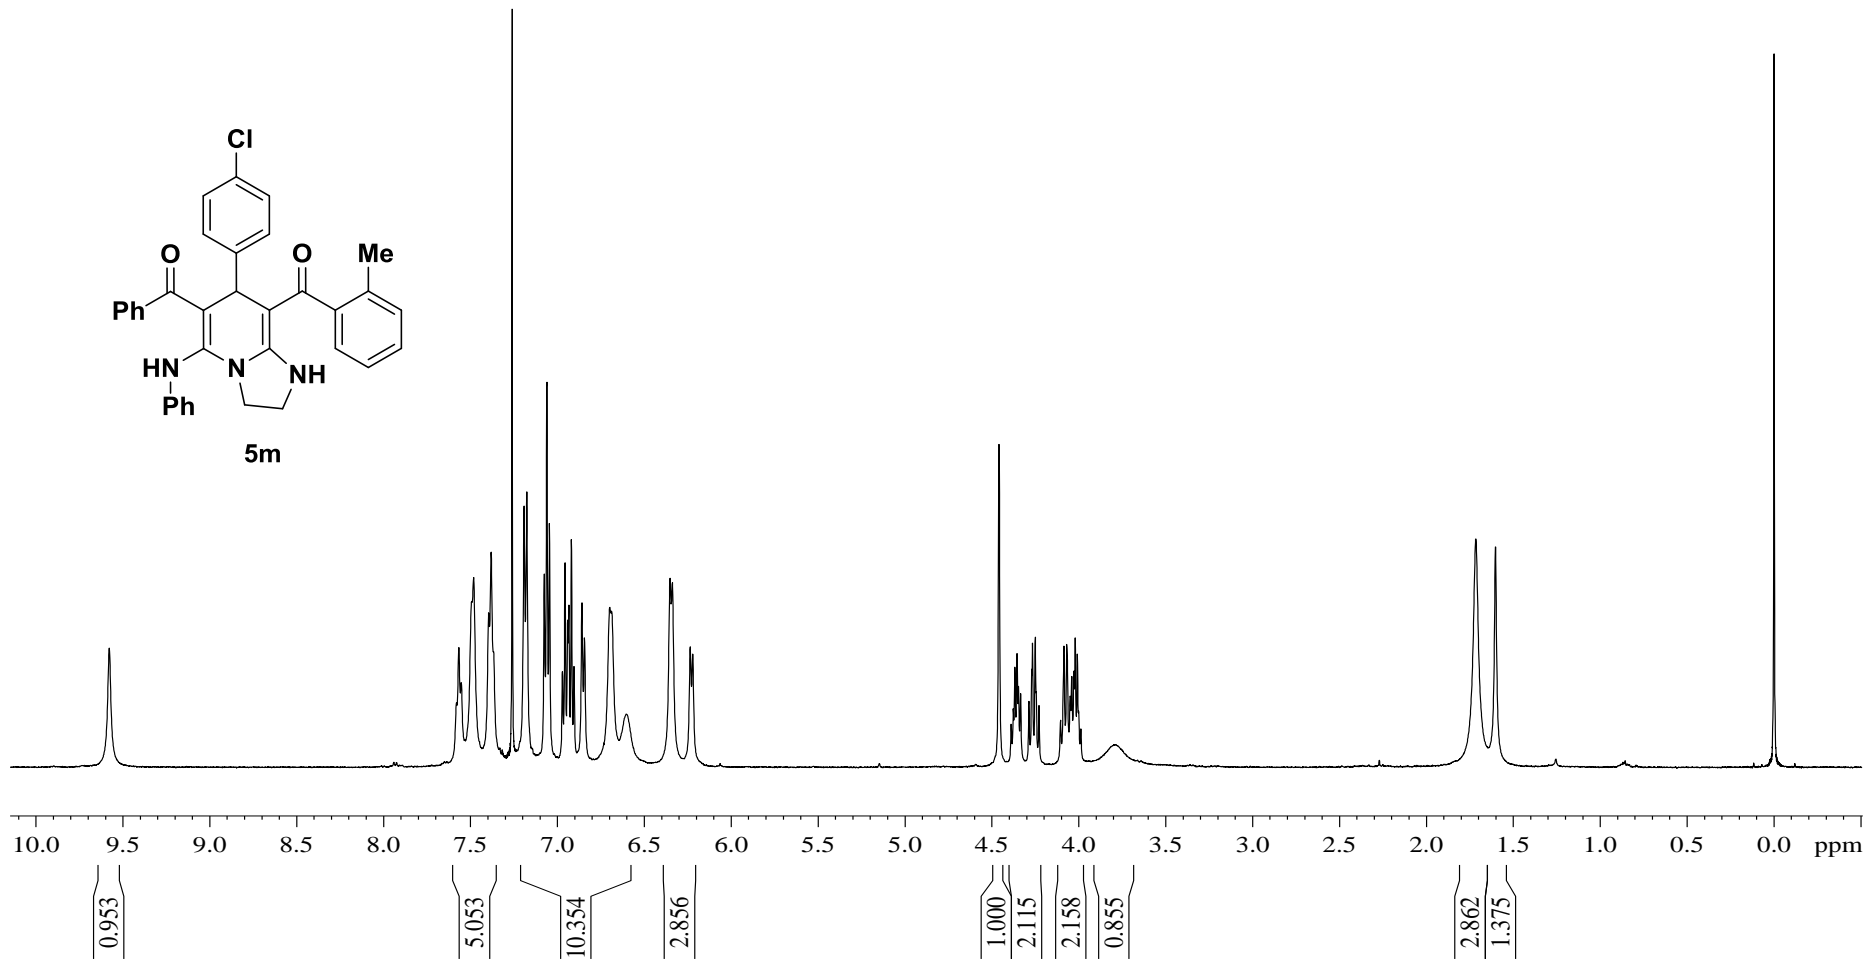

195.192  
192.591

157.415  
149.859  
148.124  
142.029  
140.527  
134.399  
133.524  
132.713  
129.956  
129.056  
128.859  
128.783  
128.123  
127.883  
127.692  
125.103  
124.628  
123.448  
120.351

85.684

77.216  
76.963  
76.709

51.875

44.364  
42.875  
42.219

18.365

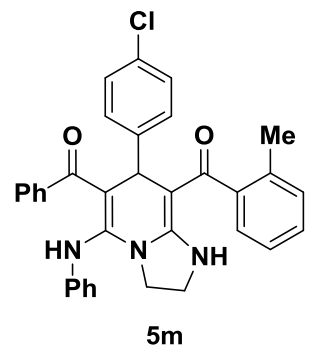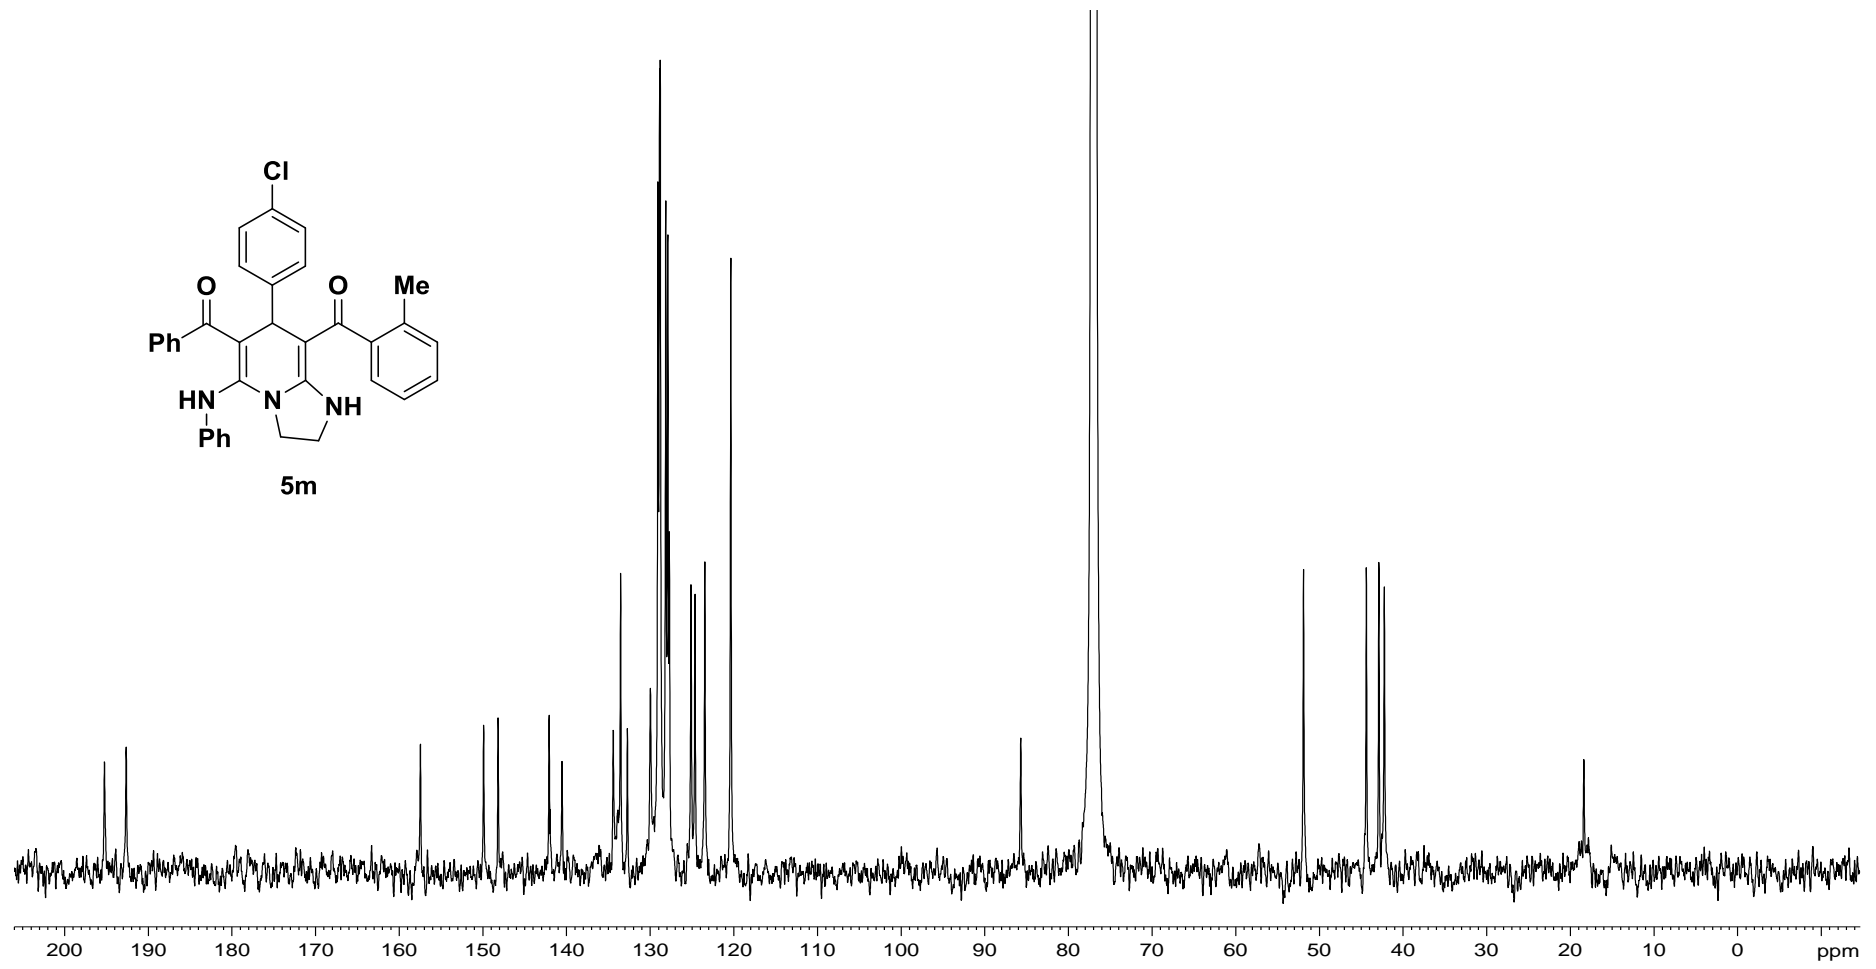

SP-E-20

1H

2012 06 28

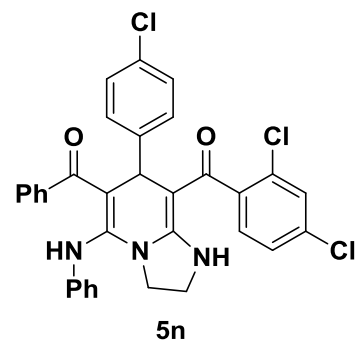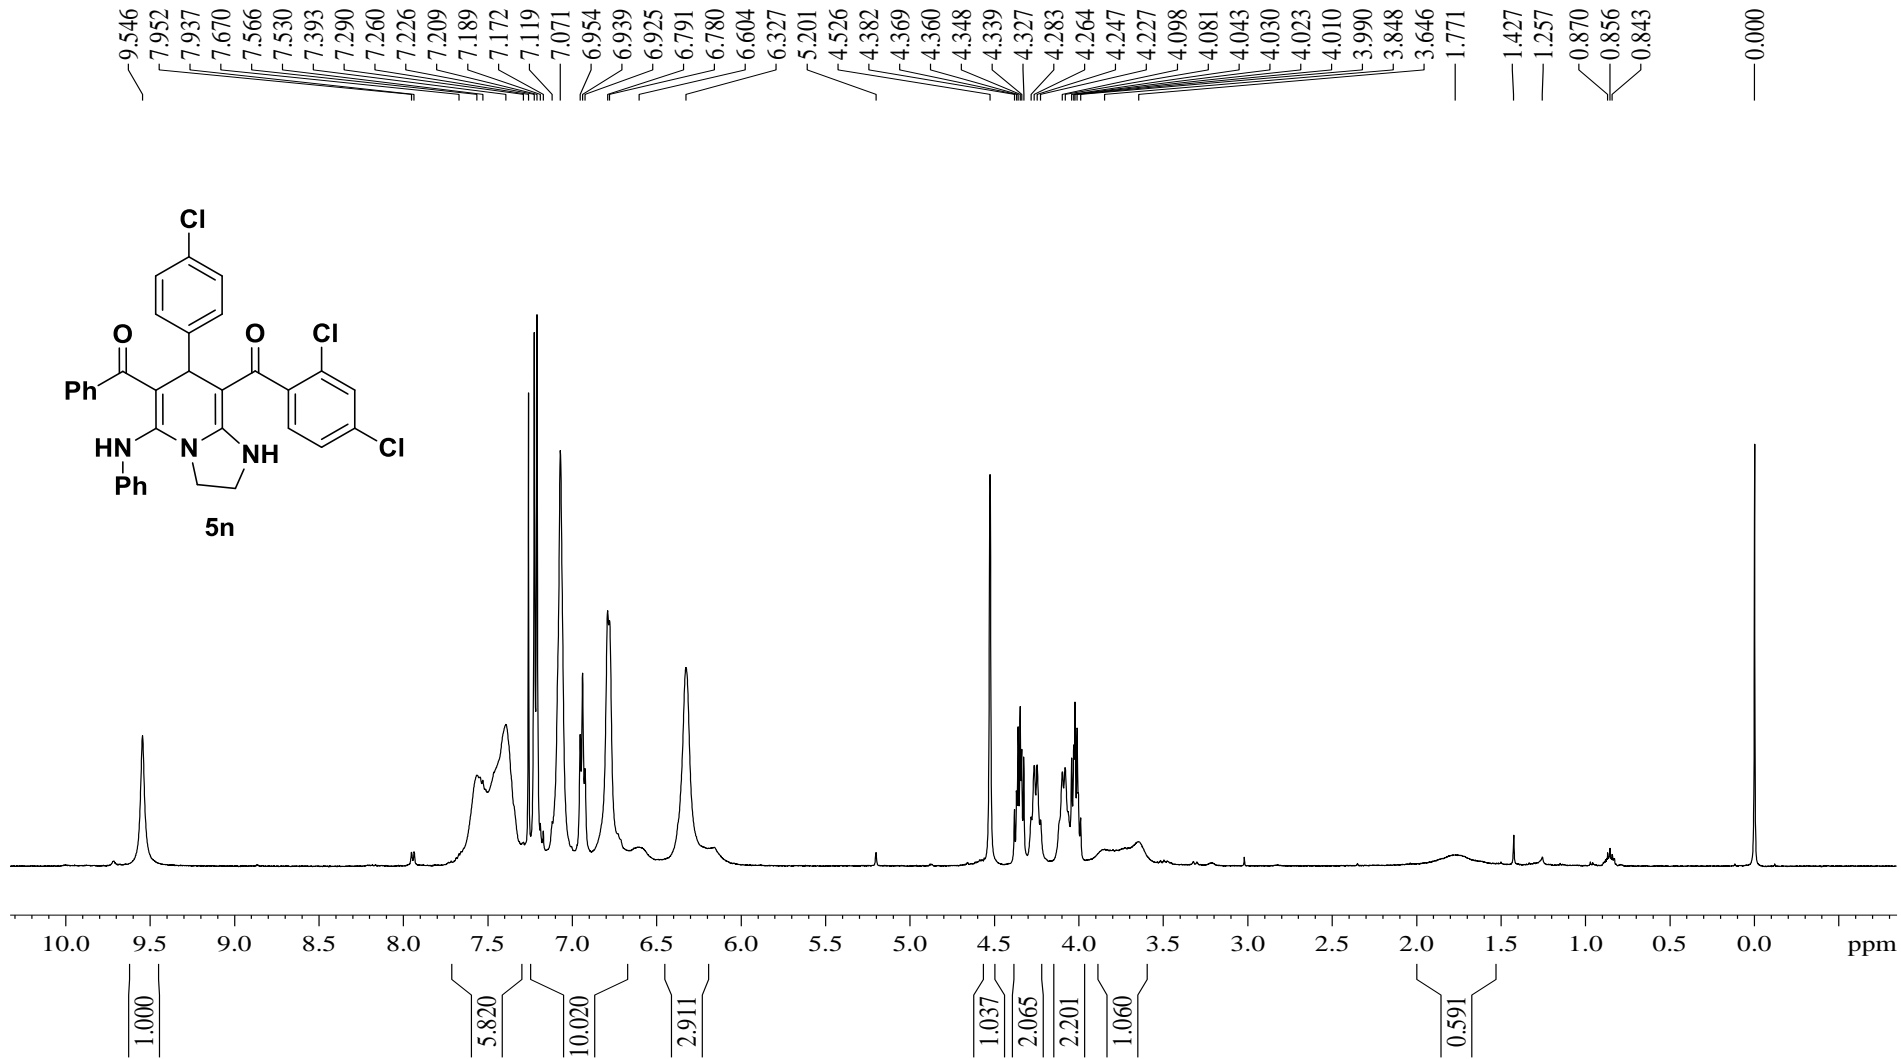



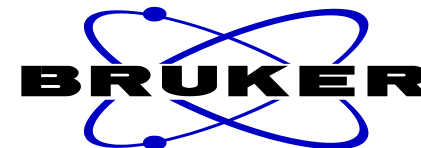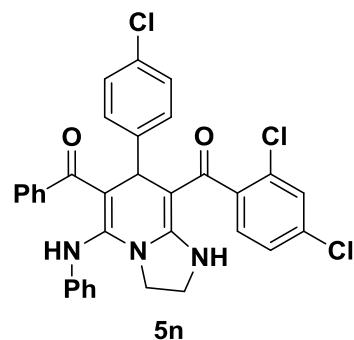

186.994  
 158.012  
 149.595  
 147.942  
 134.379  
 134.088  
 133.658  
 132.971  
 129.135  
 128.939  
 128.188  
 127.849  
 126.303  
 123.617  
 120.245

44.440  
 42.979  
 41.840

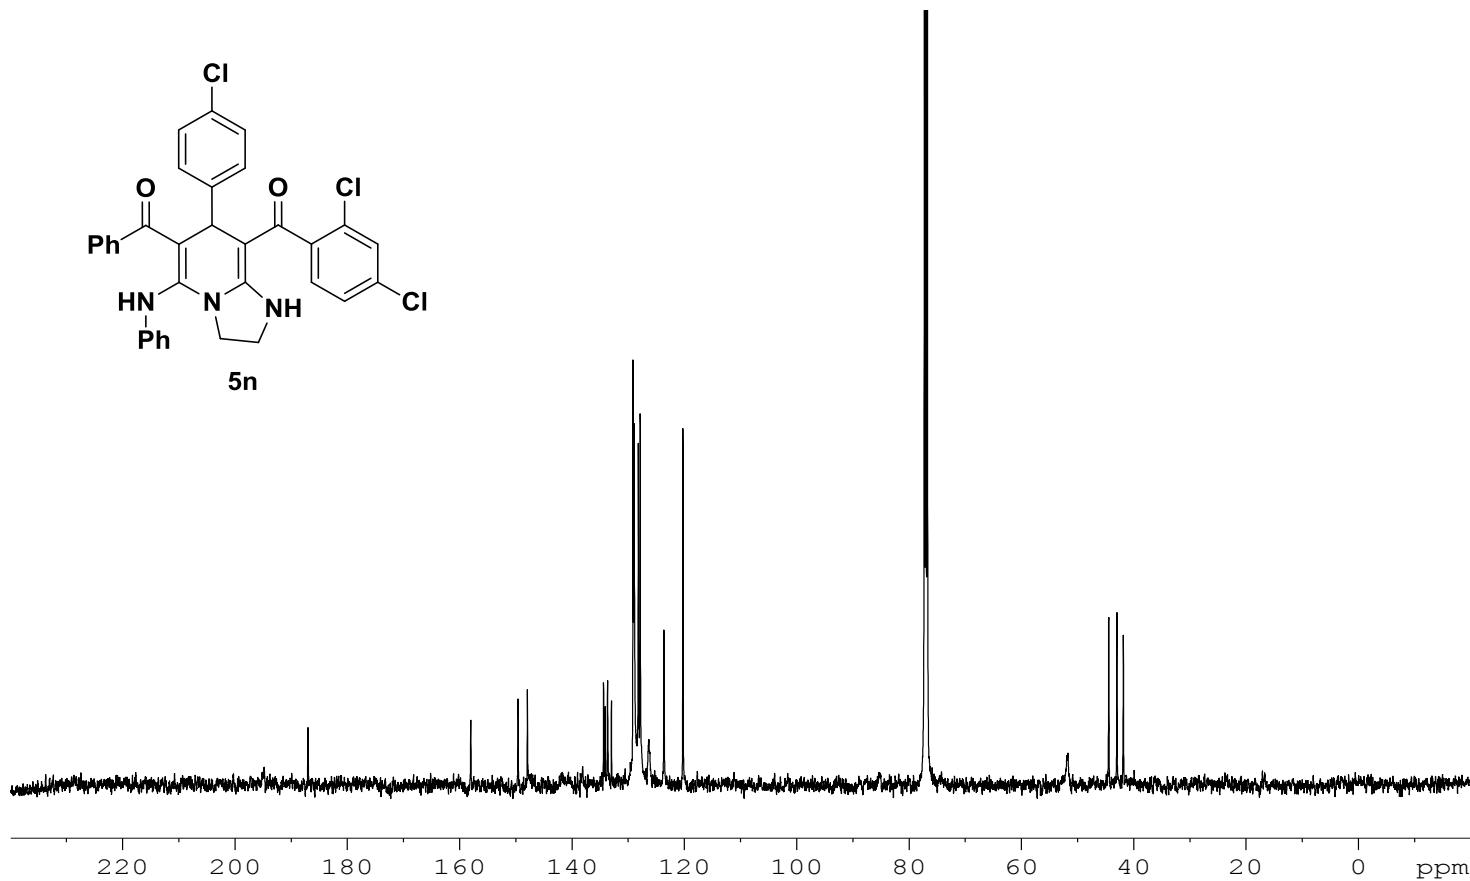

```

NAME          SP-E-20
EXPNO         2
PROCNO        1
Date_         20130621
Time_         17.00
INSTRUM       spect
PROBHD        5 mm PABBO BB-
PULPROG       zgpg30
TD            65536
SOLVENT       CDC13
NS            920
DS            2
SWH           32679.738 Hz
FIDRES        0.498653 Hz
AQ            1.0027661 sec
RG            1820
DW            15.300 usec
DE            6.00 usec
TE            299.0 K
D1            2.00000000 sec
d11           0.03000000 sec
DELTA         1.89999998 sec
TD0           20
    
```

```

===== CHANNEL f1 =====
NUC1          13C
P1            12.20 usec
PL1           3.00 dB
SFO1          125.7464750 MHz
    
```

```

===== CHANNEL f2 =====
CPDPRG2       waltz16
NUC2          1H
PCPD2         80.00 usec
PL2           2.00 dB
PL12          17.70 dB
PL13          17.70 dB
SFO2          500.0355000 MHz
SI            32768
SF            125.7326474 MHz
WDW           EM
SSB           0
LB            6.00 Hz
GB            0
PC            1.00
    
```

SP-E-15

1H

2012 05 14

9.482

7.655

7.469

7.325

7.082

6.976

6.964

6.913

6.171

4.465

4.120

4.106

3.914

3.794

2.523

2.484

1.968

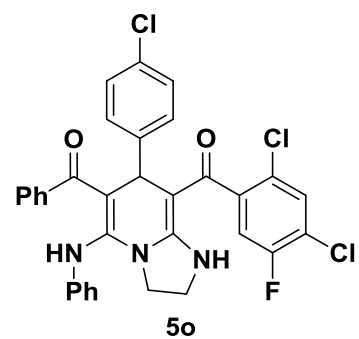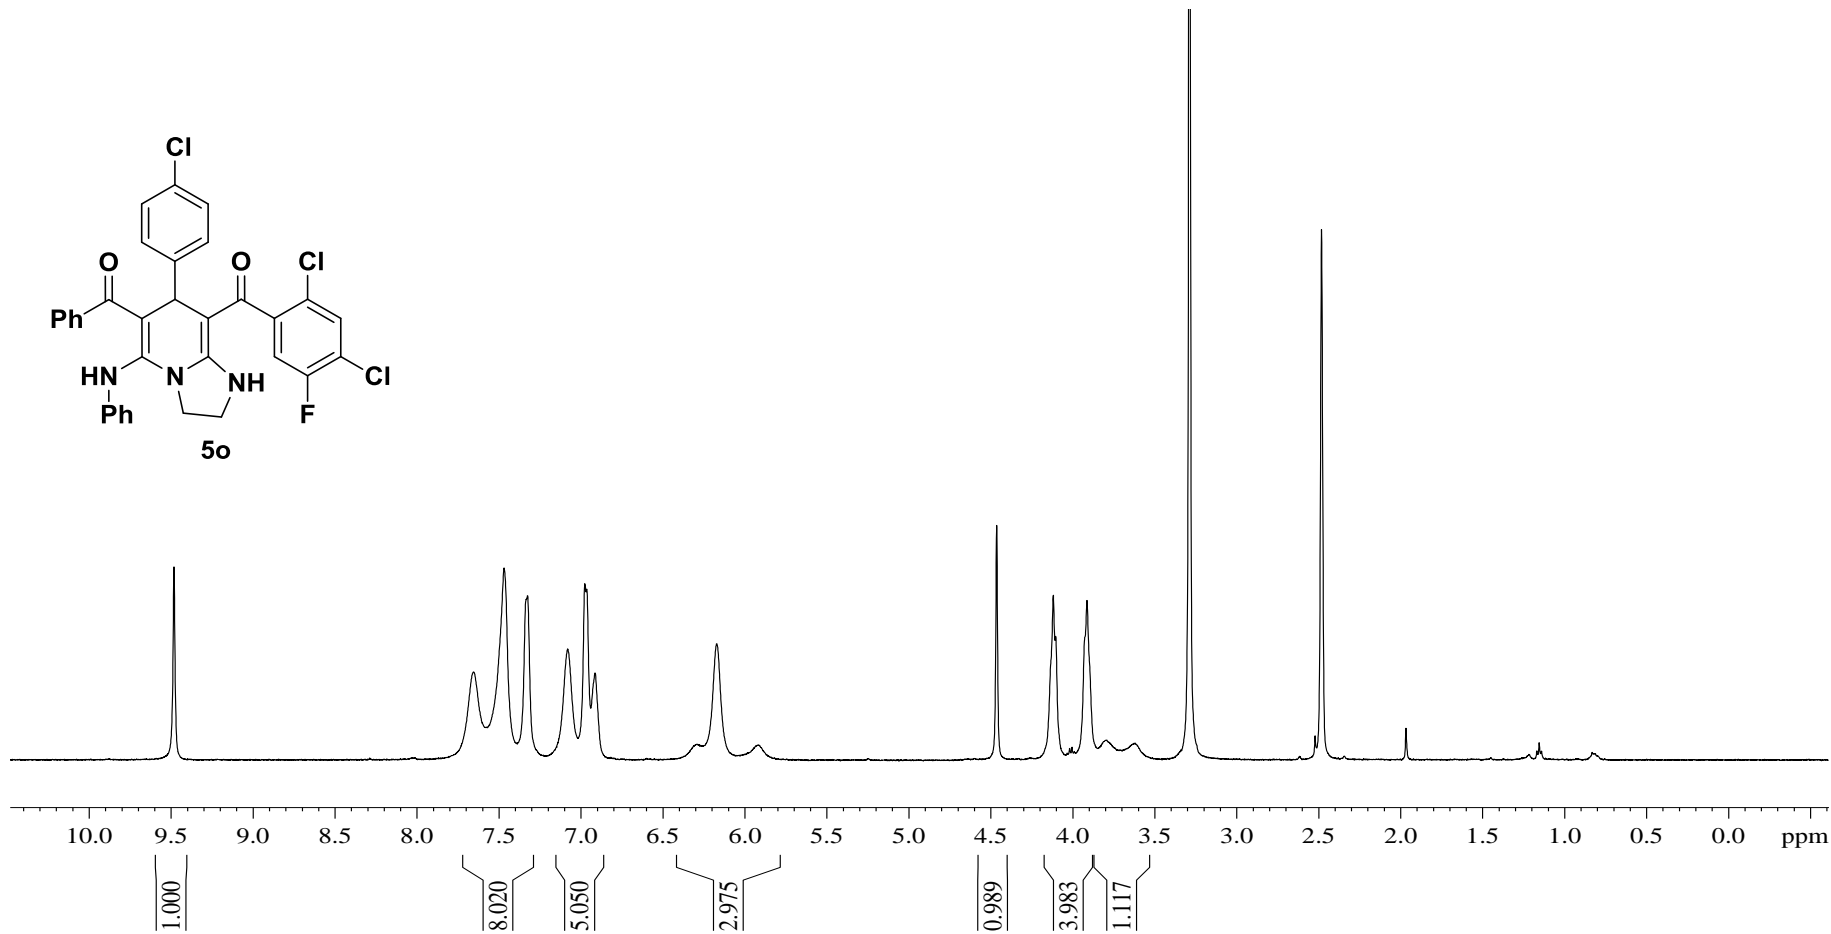

SP-E-15 13C 1D 2012 05 15

183.281  
157.194  
156.706  
154.717  
149.578  
148.353  
134.463  
134.125  
132.054  
129.527  
129.071  
128.833  
128.411  
123.730  
120.214  
120.018

44.464  
43.481  
41.992

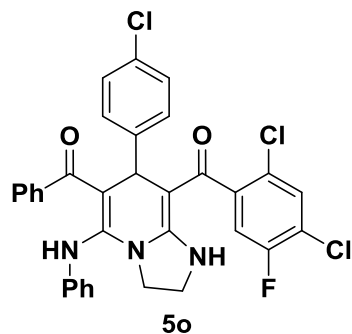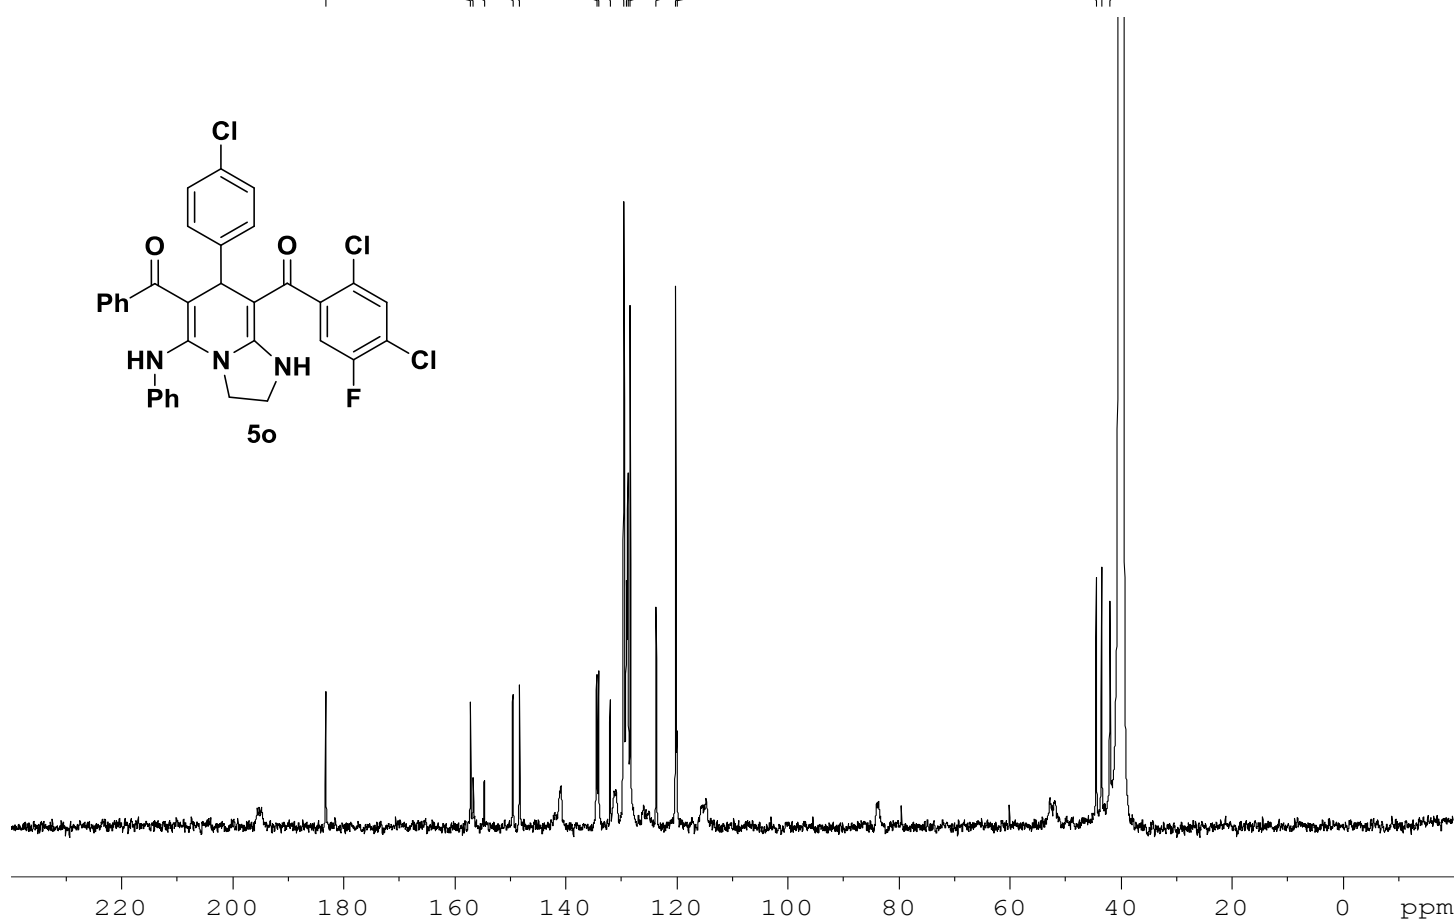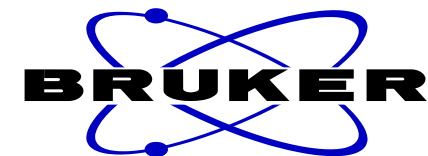

NAME SP-E-15  
EXPNO 2  
PROCNO 1  
Date\_ 20120515  
Time\_ 21.59  
INSTRUM av500  
PROBHD 5 mm PABBO BB-  
PULPROG zgpg30  
TD 65536  
SOLVENT DMSO  
NS 11304  
DS 2  
SWH 32679.738 Hz  
FIDRES 0.498653 Hz  
AQ 1.0027661 sec  
RG 2050  
DW 15.300 usec  
DE 6.00 usec  
TE 296.4 K  
D1 2.00000000 sec  
d11 0.03000000 sec  
DELTA 1.89999998 sec  
TD0 1

==== CHANNEL f1 =====  
NUC1 13C  
P1 9.60 usec  
PL1 2.00 dB  
SFO1 125.7464750 MHz

==== CHANNEL f2 =====  
CPDPRG2 waltz16  
NUC2 1H  
PCPD2 80.00 usec  
PL2 2.20 dB  
PL12 17.66 dB  
PL13 17.66 dB  
SFO2 500.0355000 MHz  
SI 32768  
SF 125.7326518 MHz  
WDW EM  
SSB 0  
LB 8.00 Hz  
GB 0  
PC 2.00

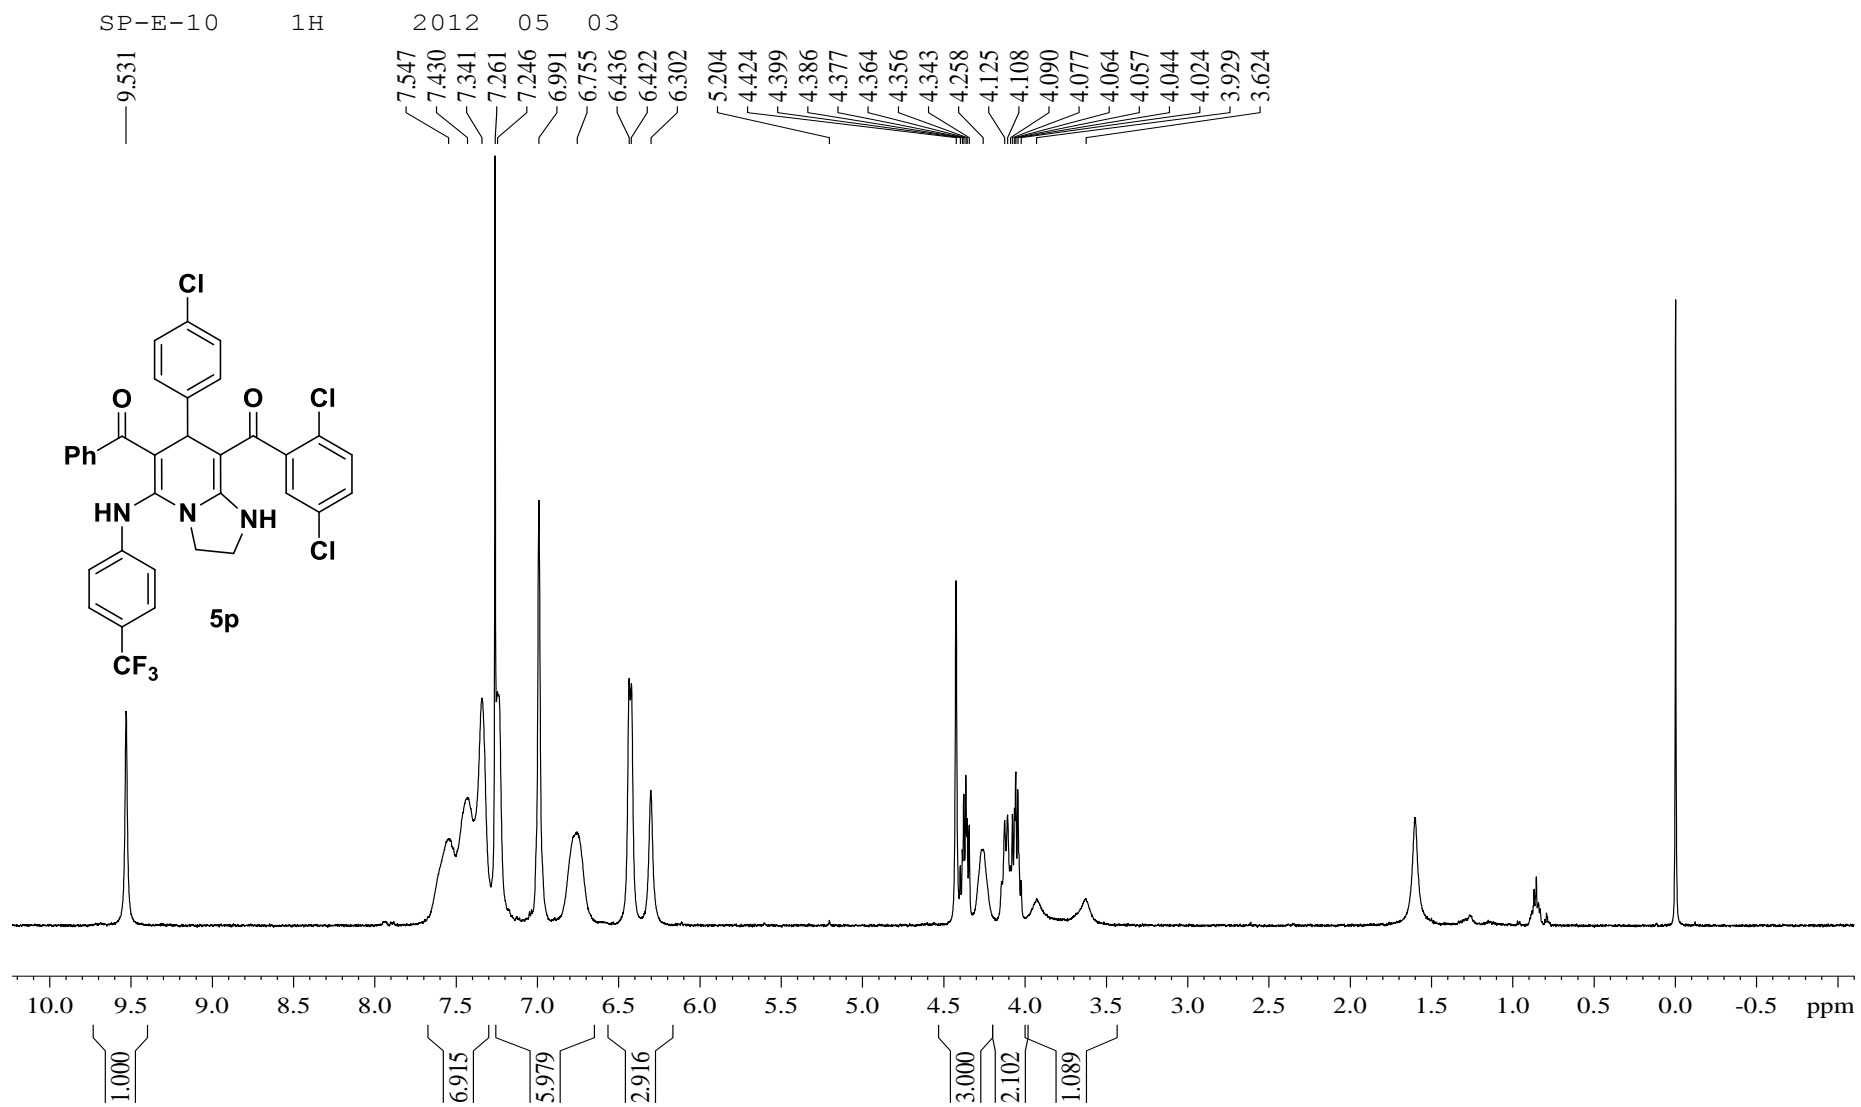

SP-E-10 13C 1D 2012 05 05

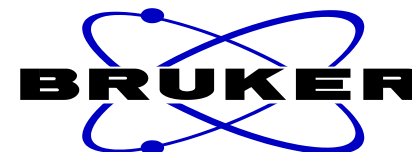

NAME SP-E-10  
EXPNO 2  
PROCNO 1  
Date\_ 20120506  
Time\_ 10.15  
INSTRUM av500  
PROBHD 5 mm PABBO BB-  
PULPROG zgpg30  
TD 65536  
SOLVENT CDCl3  
NS 1271  
DS 2  
SWH 32679.738 Hz  
FIDRES 0.498653 Hz  
AQ 1.0027661 sec  
RG 11500  
DW 15.300 usec  
DE 6.00 usec  
TE 300.3 K  
D1 2.0000000 sec  
d11 0.0300000 sec  
DELTA 1.89999998 sec  
TD0 1

==== CHANNEL f1 =====  
NUC1 13C  
P1 9.60 usec  
PL1 2.00 dB  
SFO1 125.7464750 MHz

==== CHANNEL f2 =====  
CPDPRG2 waltz16  
NUC2 1H  
PCPD2 80.00 usec  
PL2 2.60 dB  
PL12 17.66 dB  
PL13 17.66 dB  
SFO2 500.0355000 MHz  
SI 32768  
SF 125.7326440 MHz  
WDW EM  
SSB 0  
LB 3.00 Hz  
GB 0  
PC 2.00

186.693

151.220  
149.858  
134.040  
133.239  
132.068  
129.199  
127.753  
126.390  
125.679  
125.254  
120.601

44.455  
43.036  
41.961

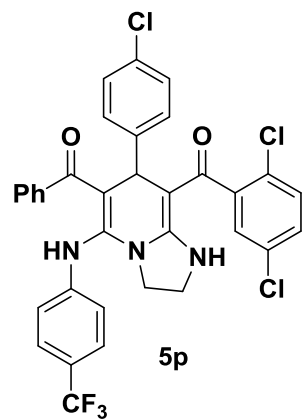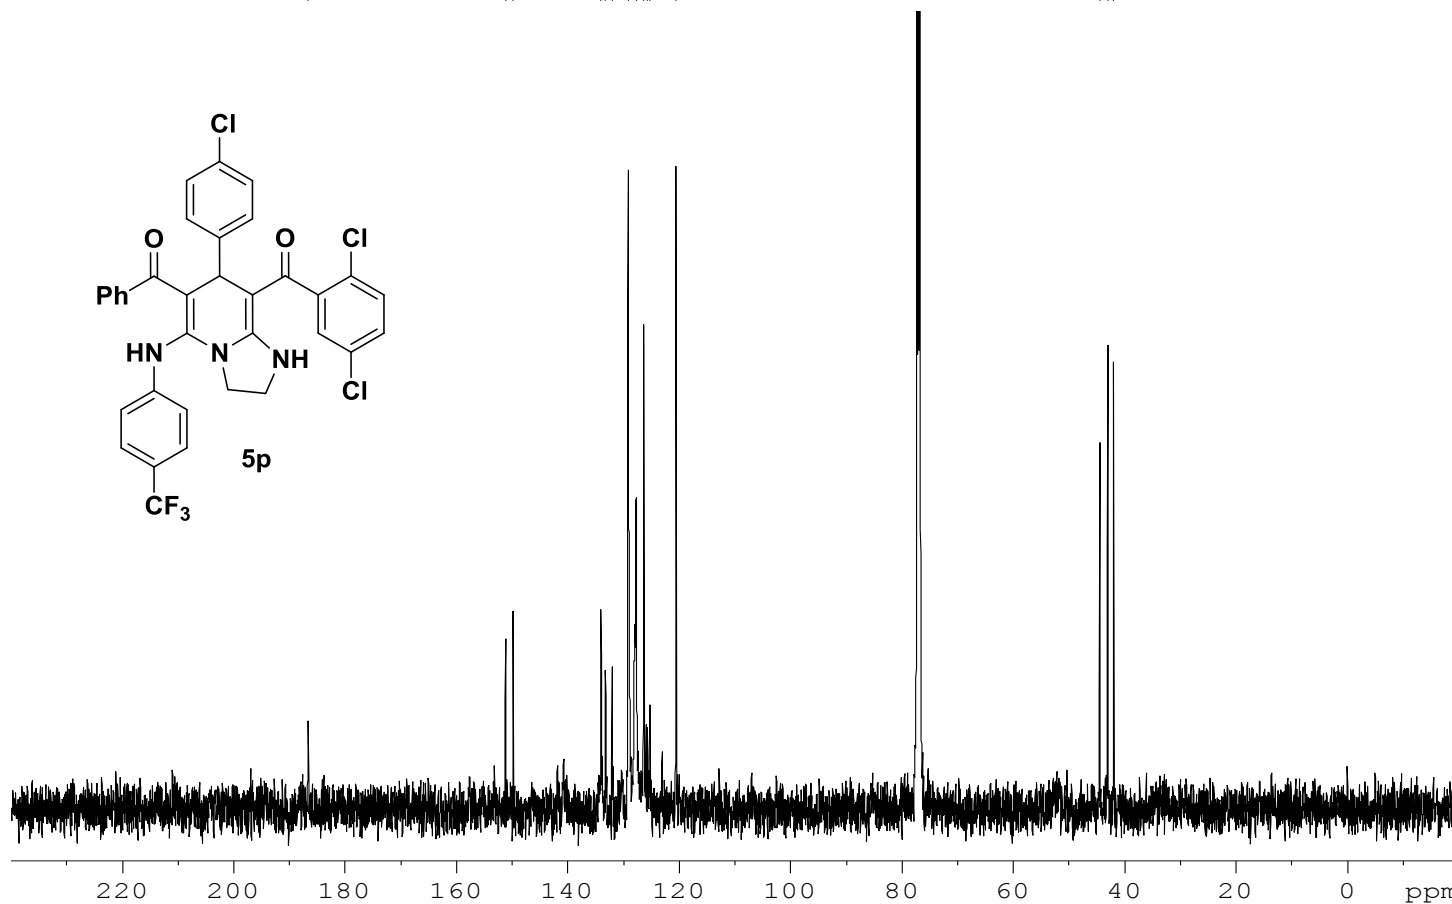

SP-E-13

1H 1D 2014 07 11

9.520  
7.480  
7.468  
7.415  
7.323  
7.289  
7.287  
7.284  
7.282  
7.279  
7.277  
7.274  
7.272  
7.269  
7.266  
7.256  
7.253  
7.251  
7.248  
7.221  
7.083  
6.953  
6.771  
6.690  
6.327  
4.463  
4.391  
4.378  
4.369  
4.356  
4.348  
4.335  
4.273  
4.112  
4.096  
4.064  
4.050  
4.043  
4.030  
4.010  
3.844  
3.517

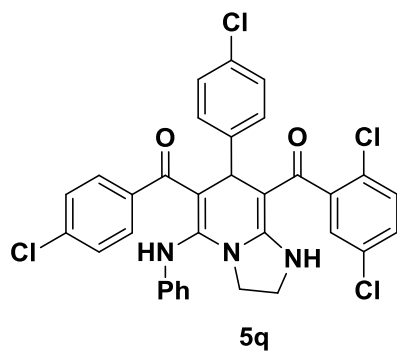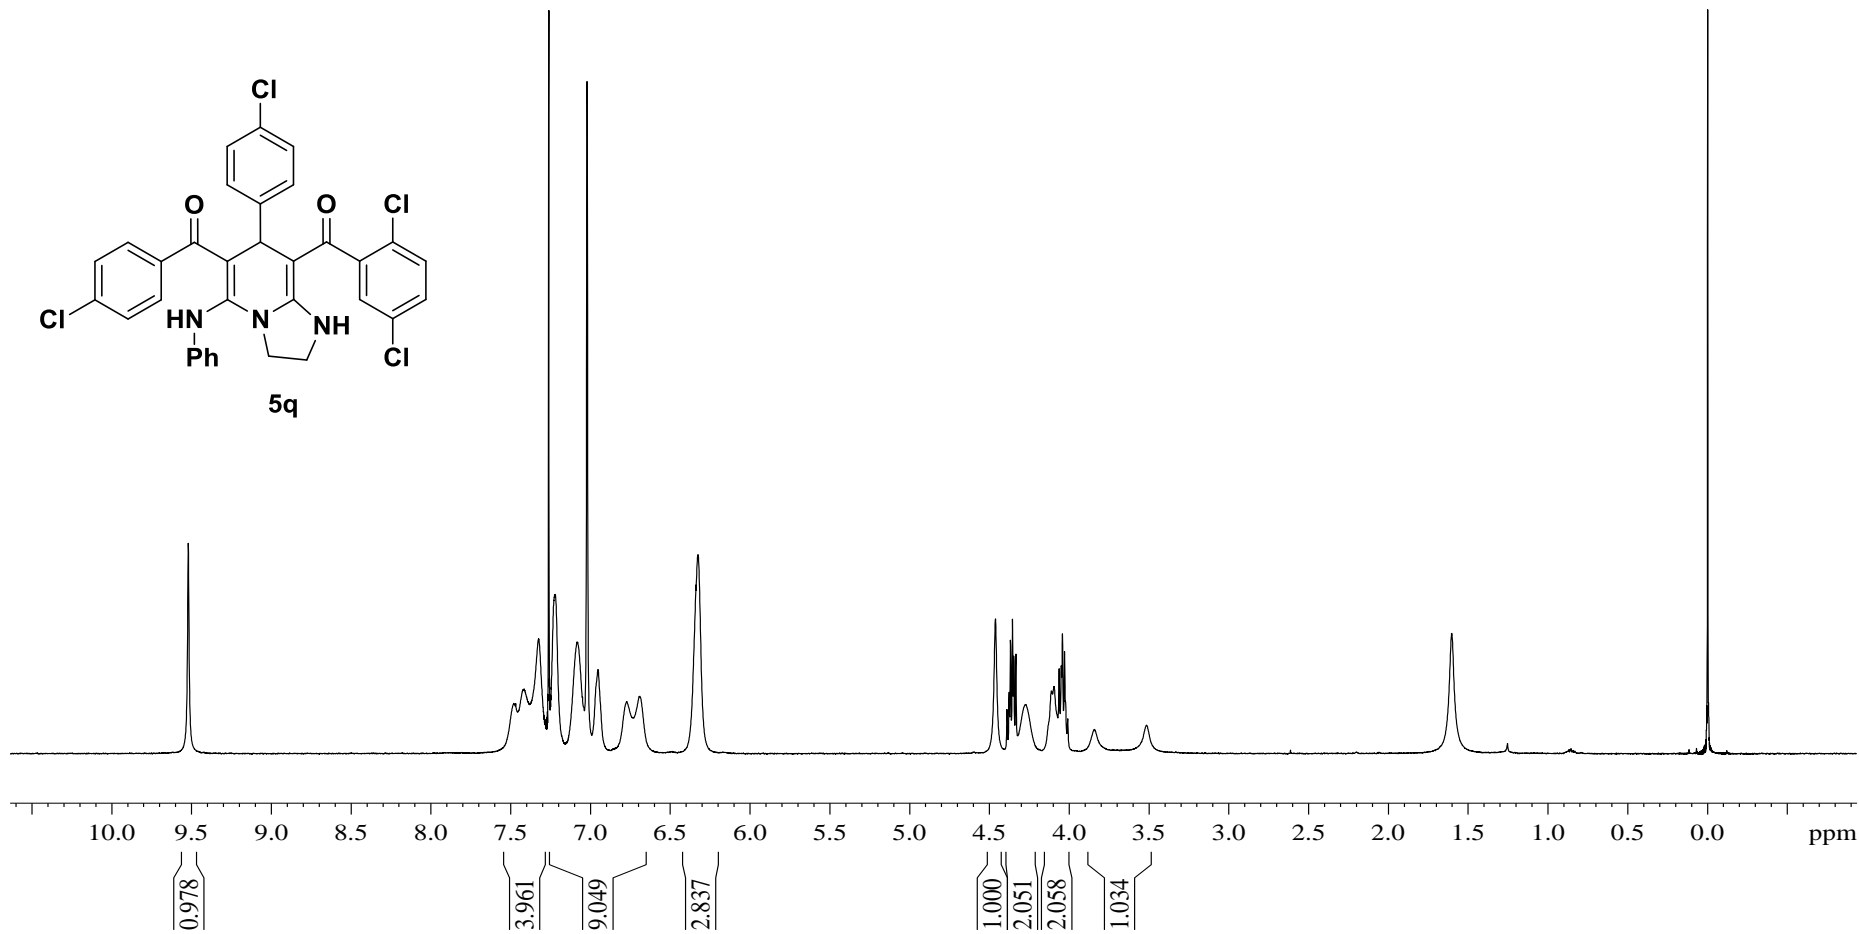

SP-E-13 13C 1D 2012 05 09

186.396  
149.329  
148.003  
133.175  
132.152  
129.432  
129.194  
129.160  
129.028  
127.755  
123.684  
120.247

44.477  
42.990  
41.984

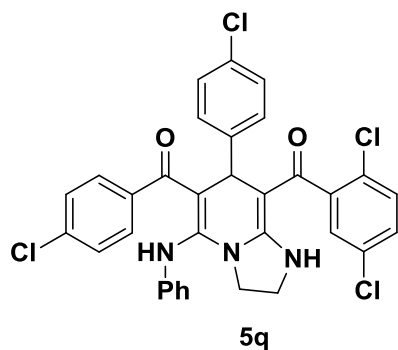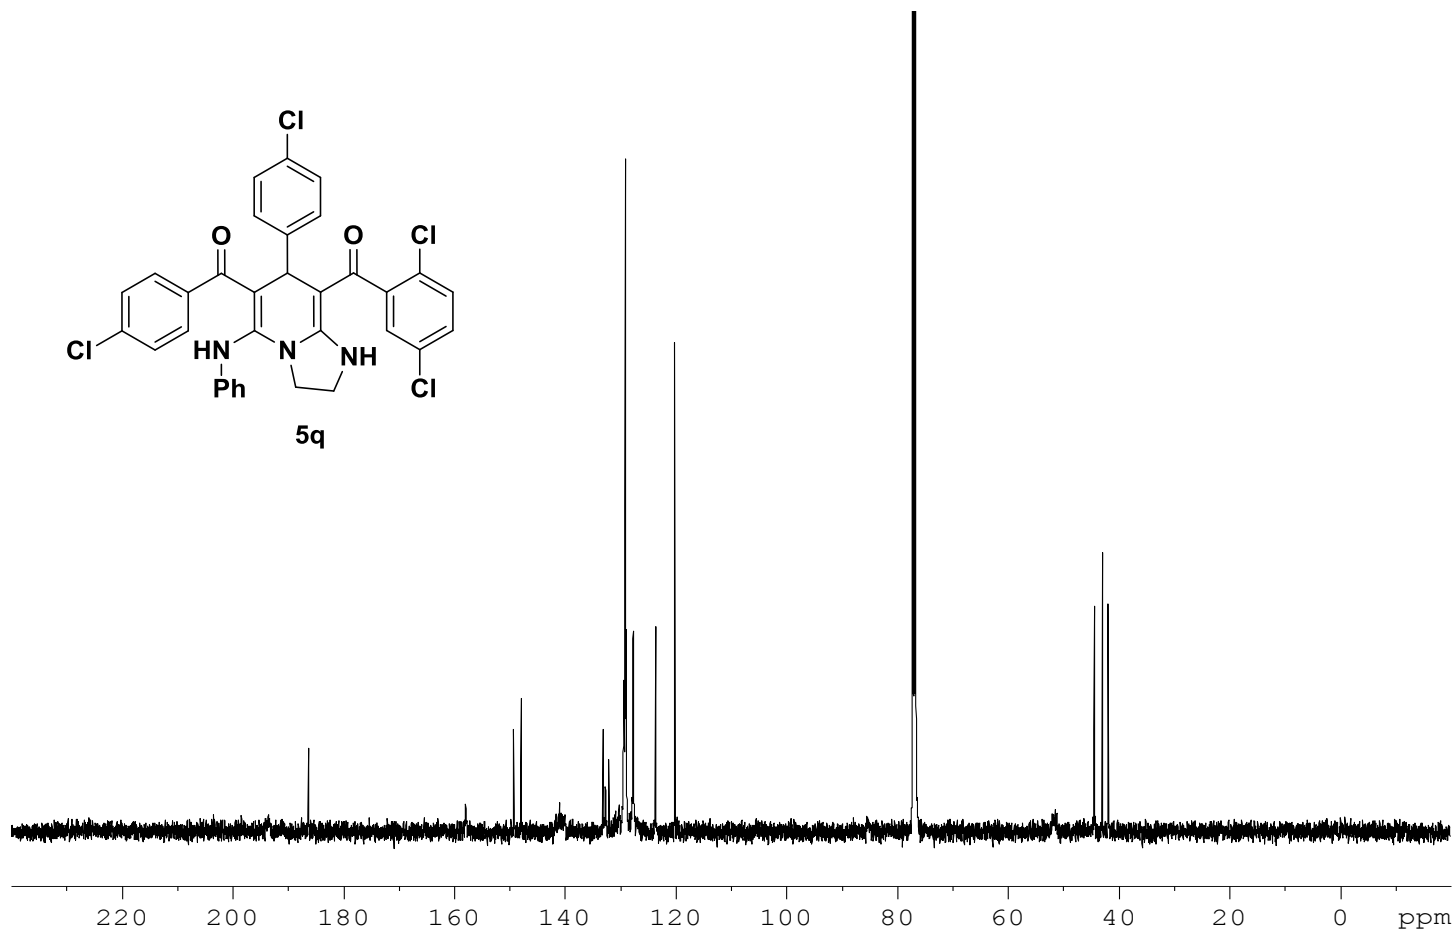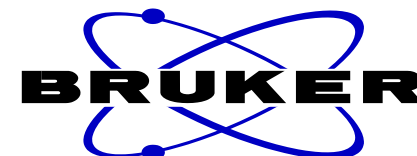

NAME SP-E-13  
EXPNO 2  
PROCNO 1  
Date\_ 20120509  
Time\_ 16.46  
INSTRUM av500  
PROBHD 5 mm PABBO BB-  
PULPROG zgpg30  
TD 65536  
SOLVENT CDC13  
NS 1890  
DS 2  
SWH 32679.738 Hz  
FIDRES 0.498653 Hz  
AQ 1.0027661 sec  
RG 11500  
DW 15.300 usec  
DE 6.00 usec  
TE 301.3 K  
D1 2.00000000 sec  
d11 0.03000000 sec  
DELTA 1.89999998 sec  
TD0 1

==== CHANNEL f1 =====  
NUC1 13C  
P1 9.60 usec  
PL1 2.00 dB  
SFO1 125.7464750 MHz

==== CHANNEL f2 =====  
CPDPRG2 waltz16  
NUC2 1H  
PCPD2 80.00 usec  
PL2 2.60 dB  
PL12 17.66 dB  
PL13 17.66 dB  
SFO2 500.0355000 MHz  
SI 32768  
SF 125.7326440 MHz  
WDW EM  
SSB 0  
LB 2.00 Hz  
GB 0  
PC 2.00

SP-E-16

1H

2012 05 23

9.517

7.482  
7.420  
7.323  
7.223  
7.080  
6.955  
6.771  
6.689  
6.327

4.464  
4.391  
4.369  
4.356  
4.336  
4.275  
4.095  
4.064  
4.044  
4.031  
3.844  
3.515

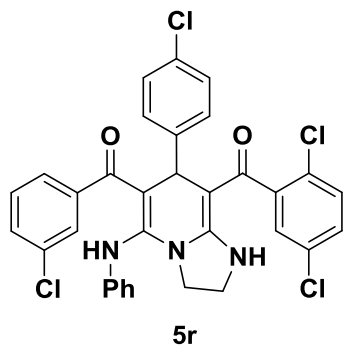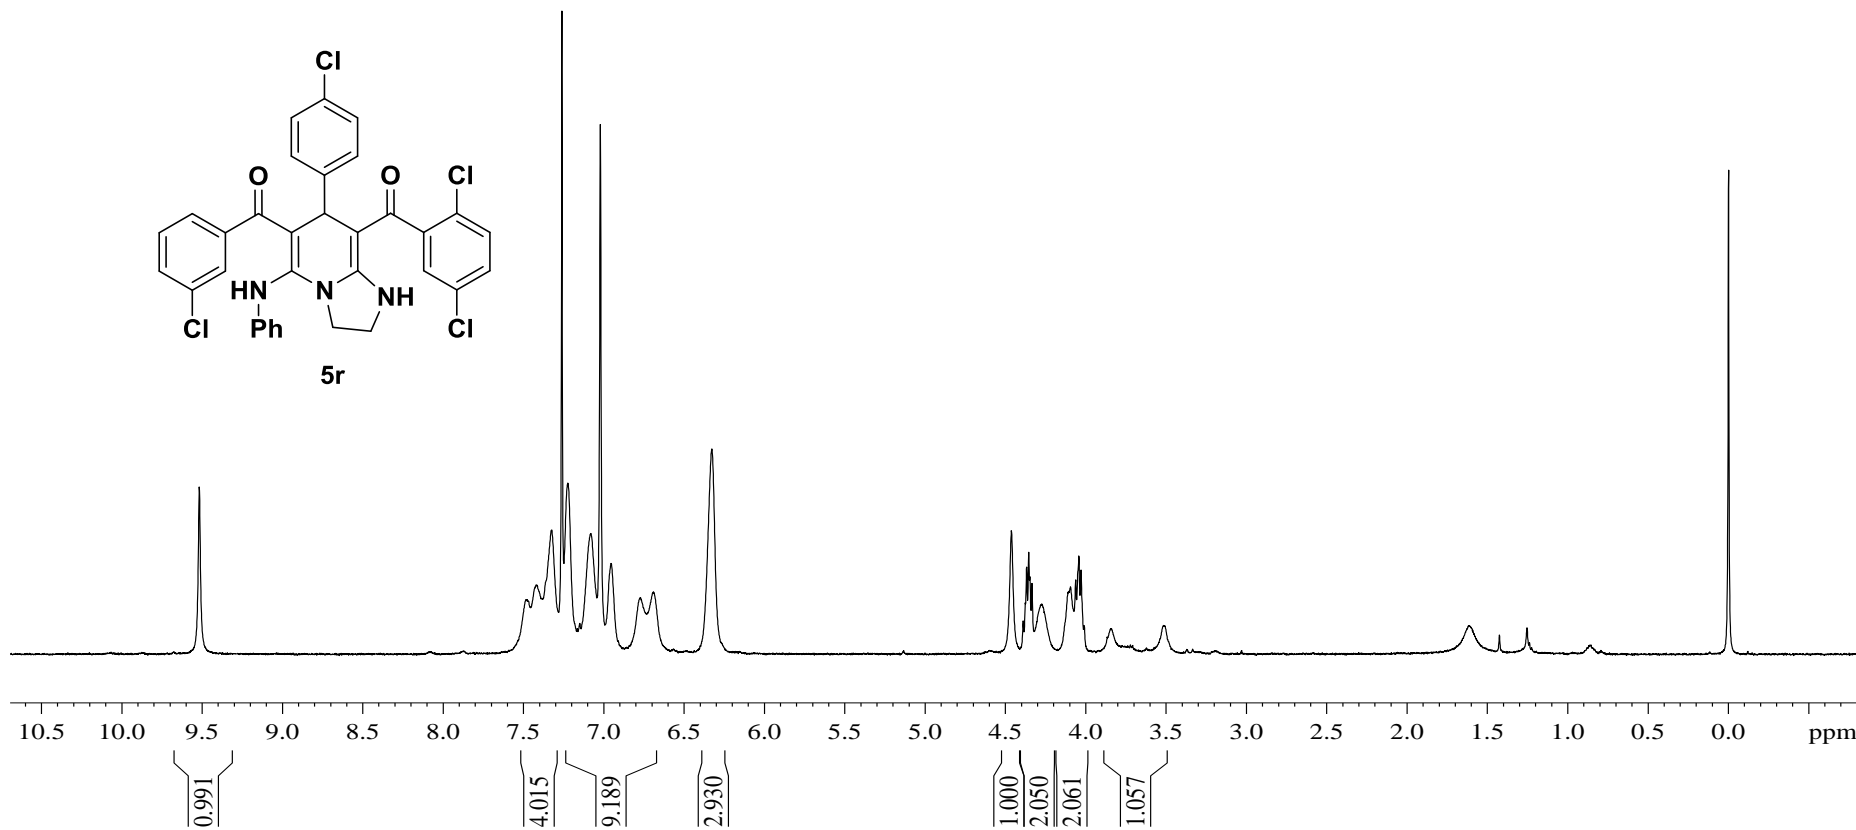



SP-E-16 13C 1D 2012 05 27

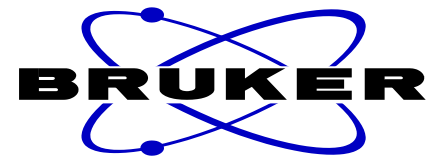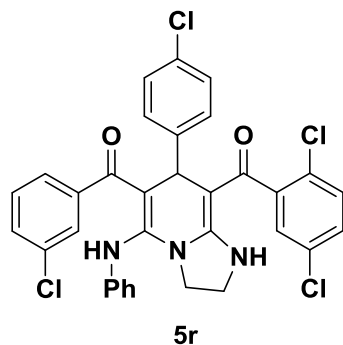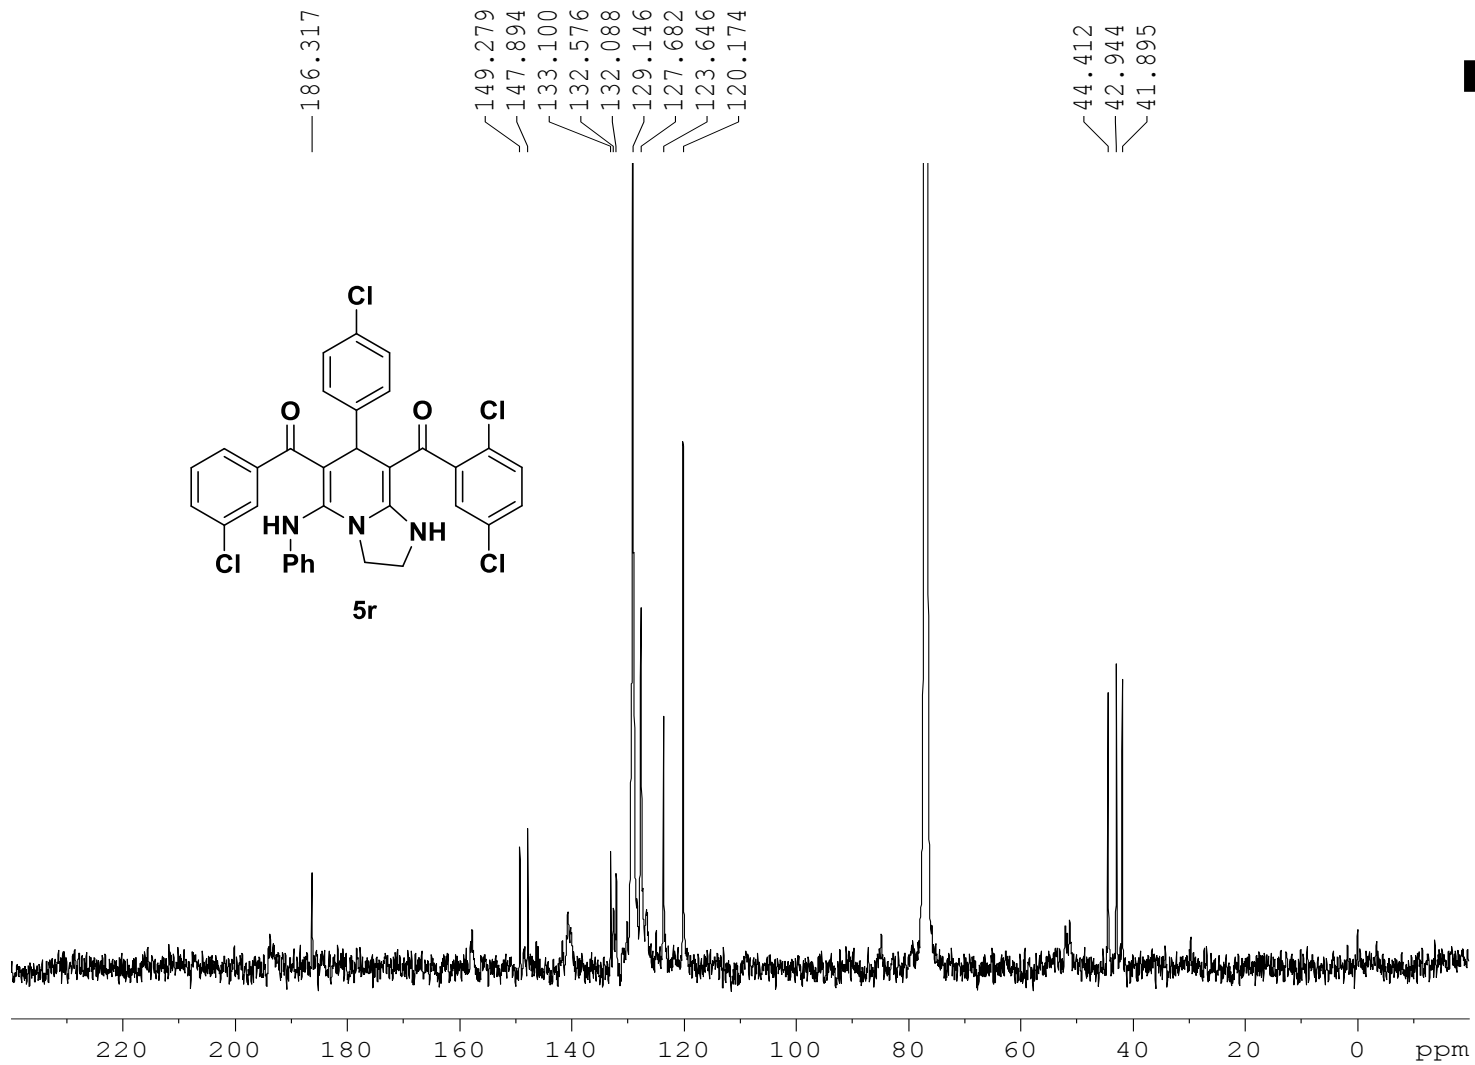

NAME SP-E-16  
EXPNO 2  
PROCNO 1  
Date\_ 20120527  
Time\_ 13.08  
INSTRUM av500  
PROBHD 5 mm PABBO BB-  
PULPROG zgpg30  
TD 65536  
SOLVENT CDCl3  
NS 3752  
DS 2  
SWH 32679.738 Hz  
FIDRES 0.498653 Hz  
AQ 1.0027661 sec  
RG 2050  
DW 15.300 usec  
DE 6.00 usec  
TE 292.6 K  
D1 2.00000000 sec  
d11 0.03000000 sec  
DELTA 1.89999998 sec  
TD0 1

==== CHANNEL f1 =====  
NUC1 13C  
P1 9.60 usec  
PL1 2.00 dB  
SFO1 125.7464750 MHz

==== CHANNEL f2 =====  
CPDPRG2 waltz16  
NUC2 1H  
PCPD2 80.00 usec  
PL2 2.20 dB  
PL12 17.66 dB  
PL13 17.66 dB  
SFO2 500.0355000 MHz  
SI 32768  
SF 125.7326518 MHz  
WDW EM  
SSB 0  
LB 8.00 Hz  
GB 0  
PC 2.00

SP-P-7 1H 1D 2013 04 25

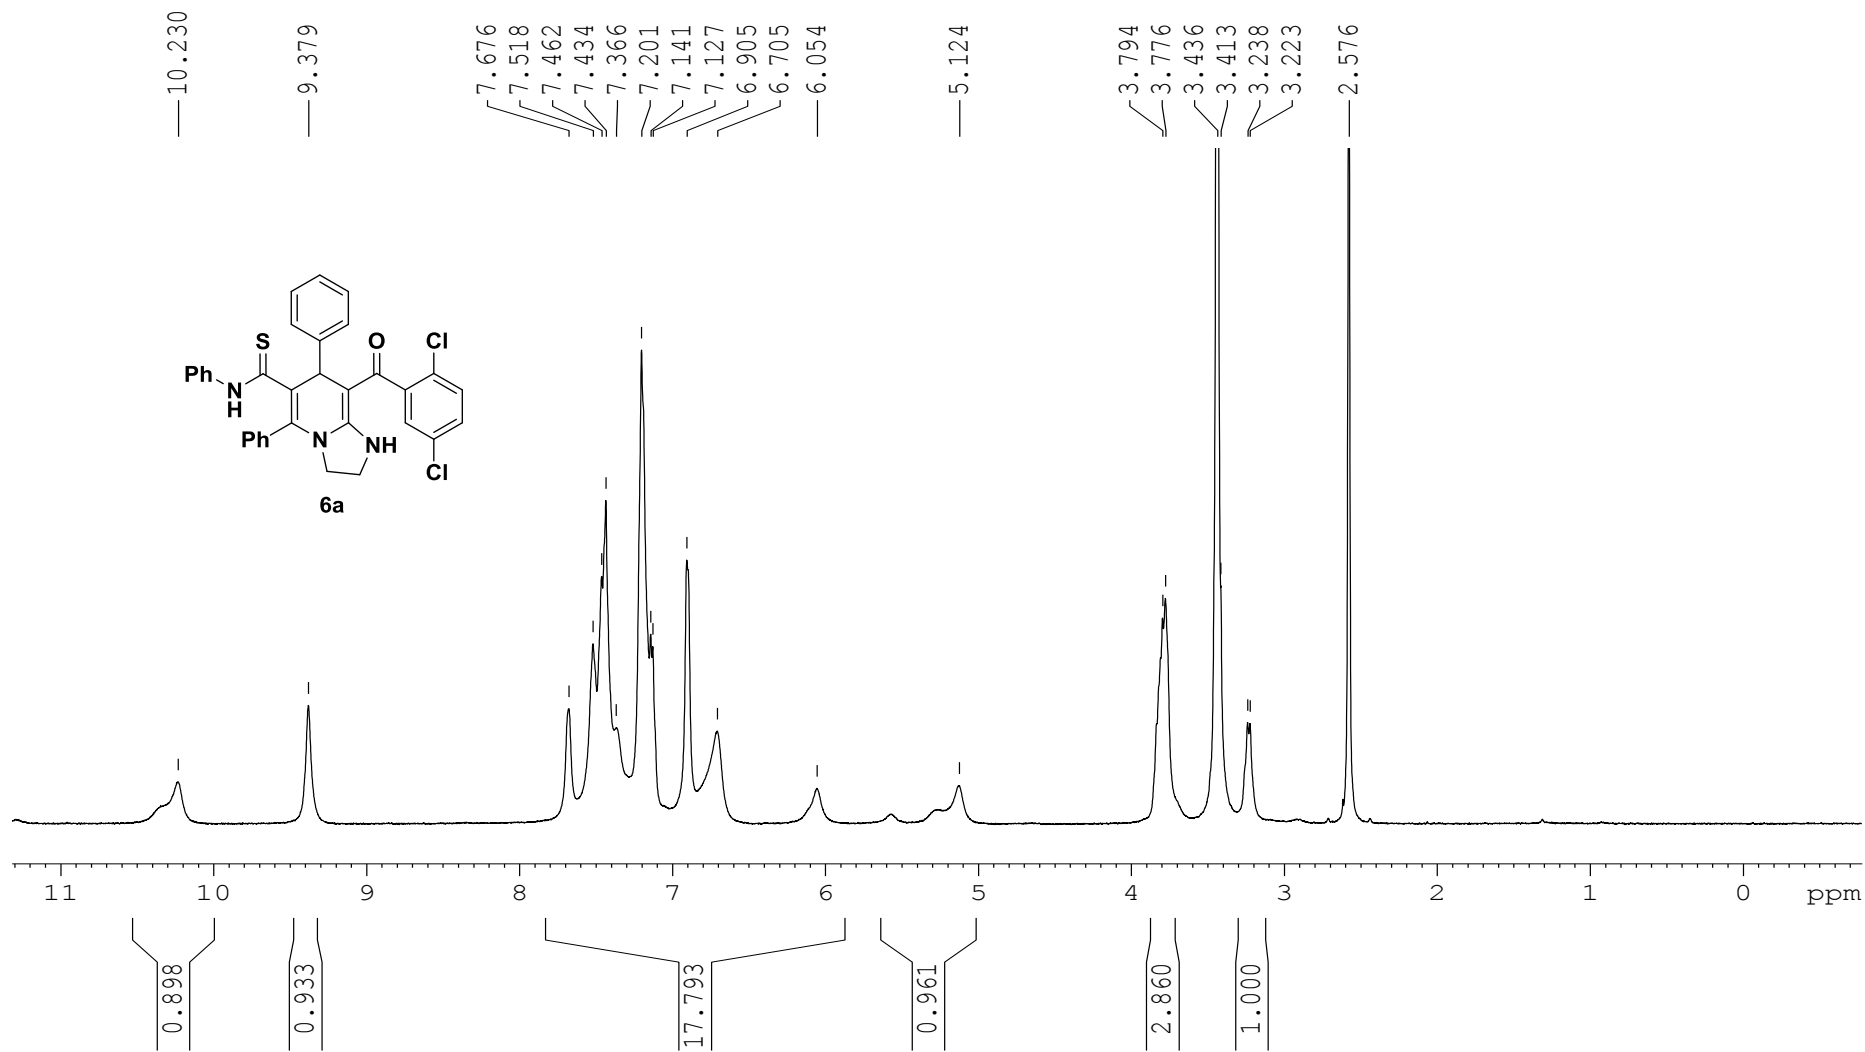

SP-P-7

13C

2013 04 29

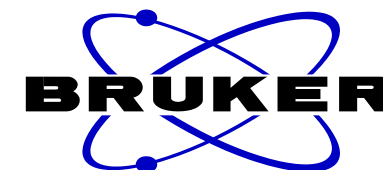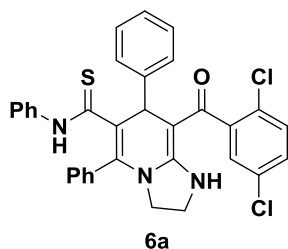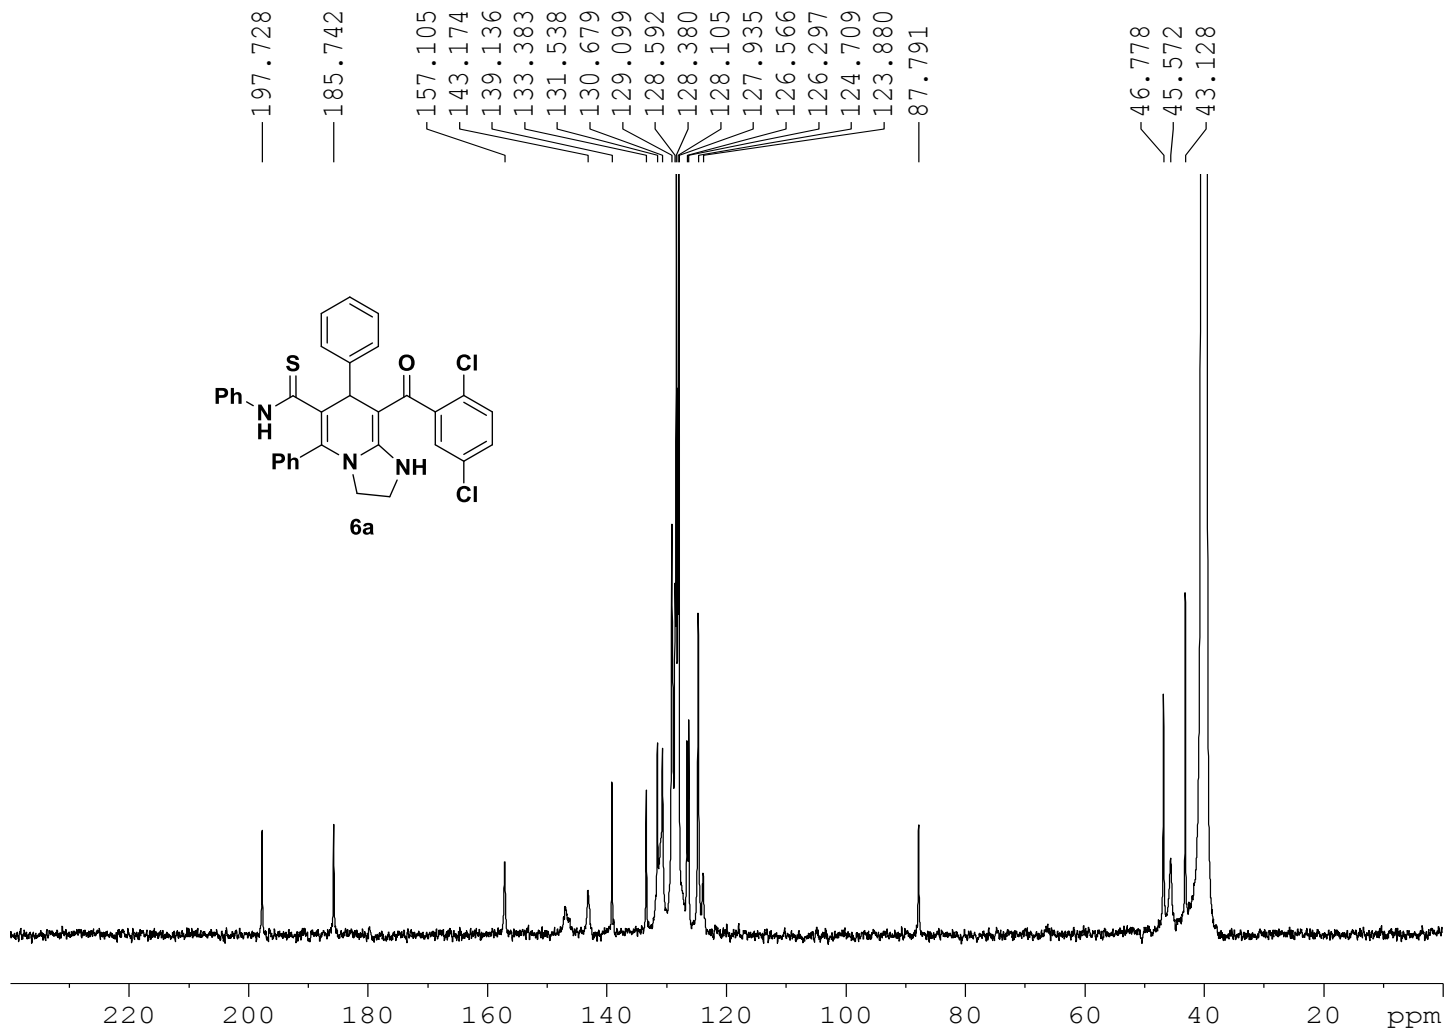

```

NAME          SP-P-7
EXPNO         2
PROCNO        1
Date_         20130429
Time_         11.19
INSTRUM       spect
PROBHD        5 mm PABBO BB-
PULPROG       zgpg30
TD            65536
SOLVENT       DMSO
NS            20000
DS            2
SWH           32679.738 Hz
FIDRES        0.498653 Hz
AQ            1.0027661 sec
RG            1820
DW            15.300 usec
DE            6.00 usec
TE            297.8 K
D1            2.00000000 sec
d11           0.03000000 sec
DELTA         1.899999998 sec
TD0           20
    
```

```

===== CHANNEL f1 =====
NUC1          13C
P1            12.20 usec
PL1           3.00 dB
SFO1          125.7464750 MHz
    
```

```

===== CHANNEL f2 =====
CPDPRG2       waltz16
NUC2          1H
PCPD2         80.00 usec
PL2           2.00 dB
PL12          17.70 dB
PL13          17.70 dB
SFO2          500.0355000 MHz
SI            32768
SF            125.7326486 MHz
WDW           EM
SSB           0
LB            8.00 Hz
GB            0
PC            1.00
    
```

SP-P-3 1H 1D 2013 01 03

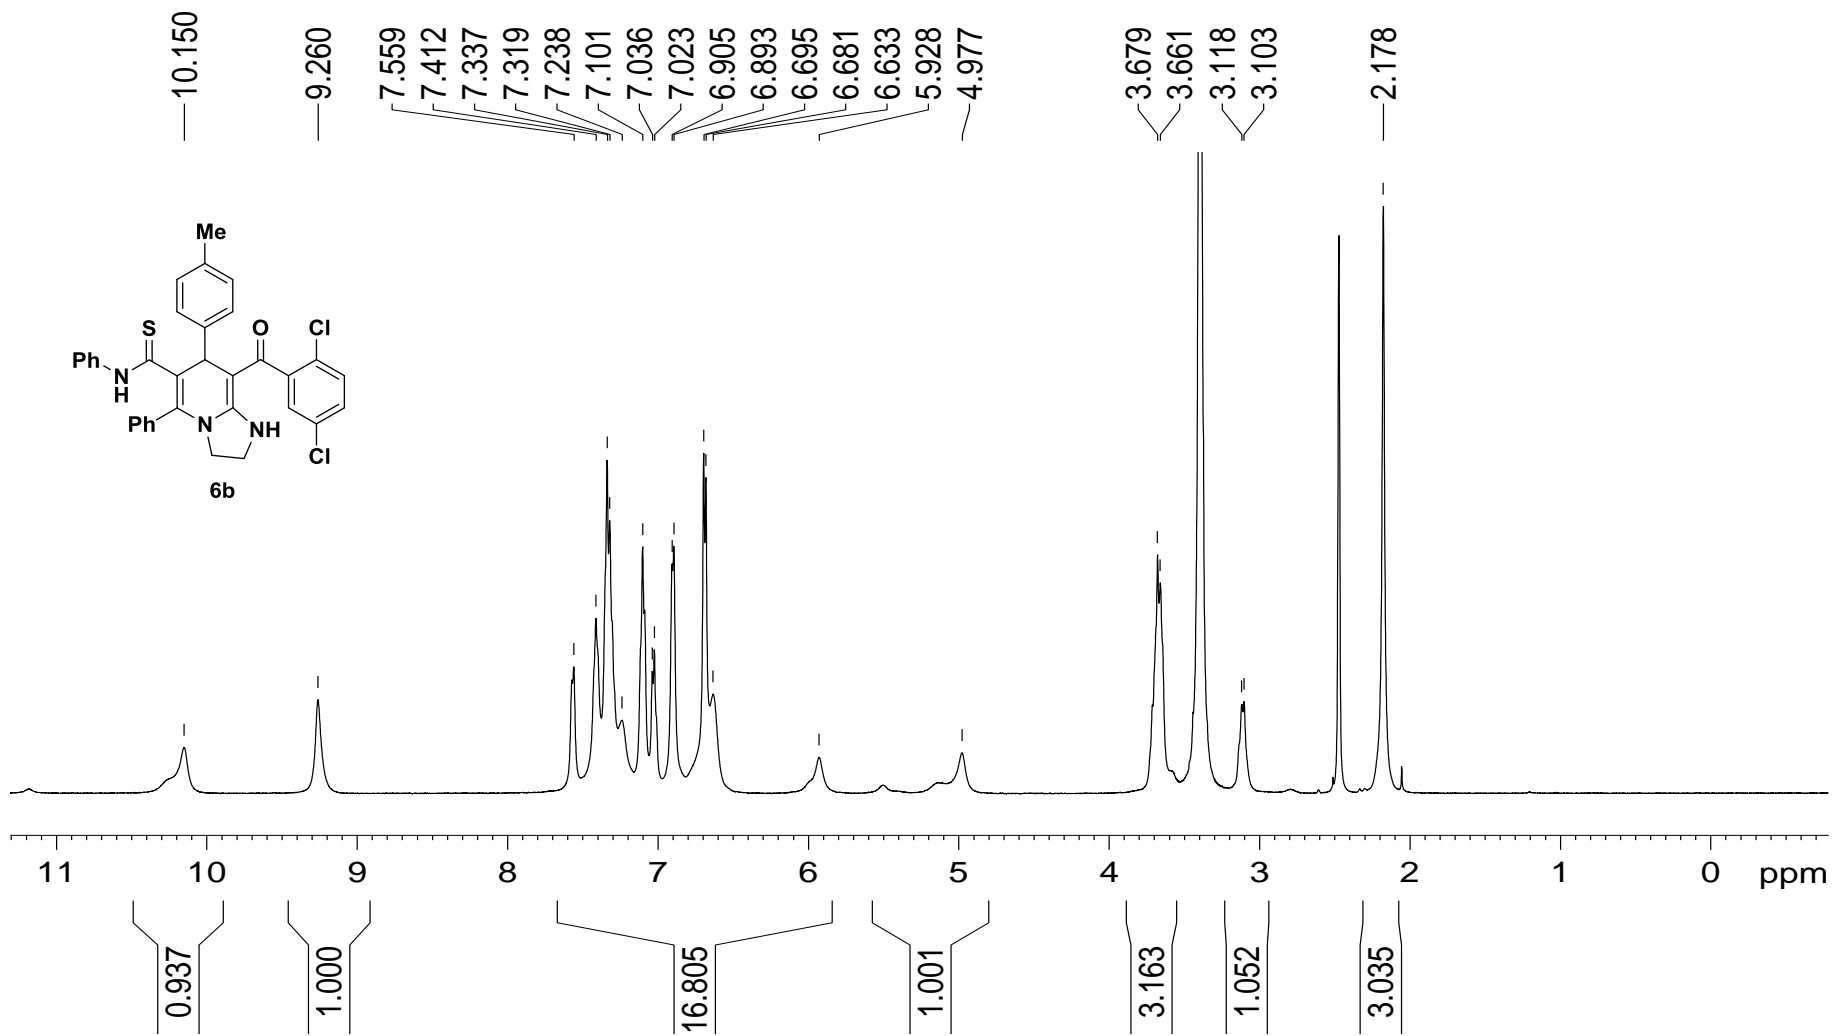

SP-P-3 13C 1D 2013 01 04

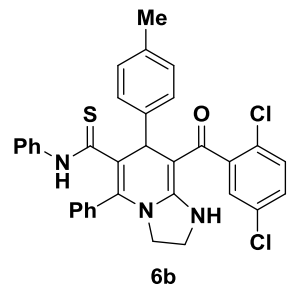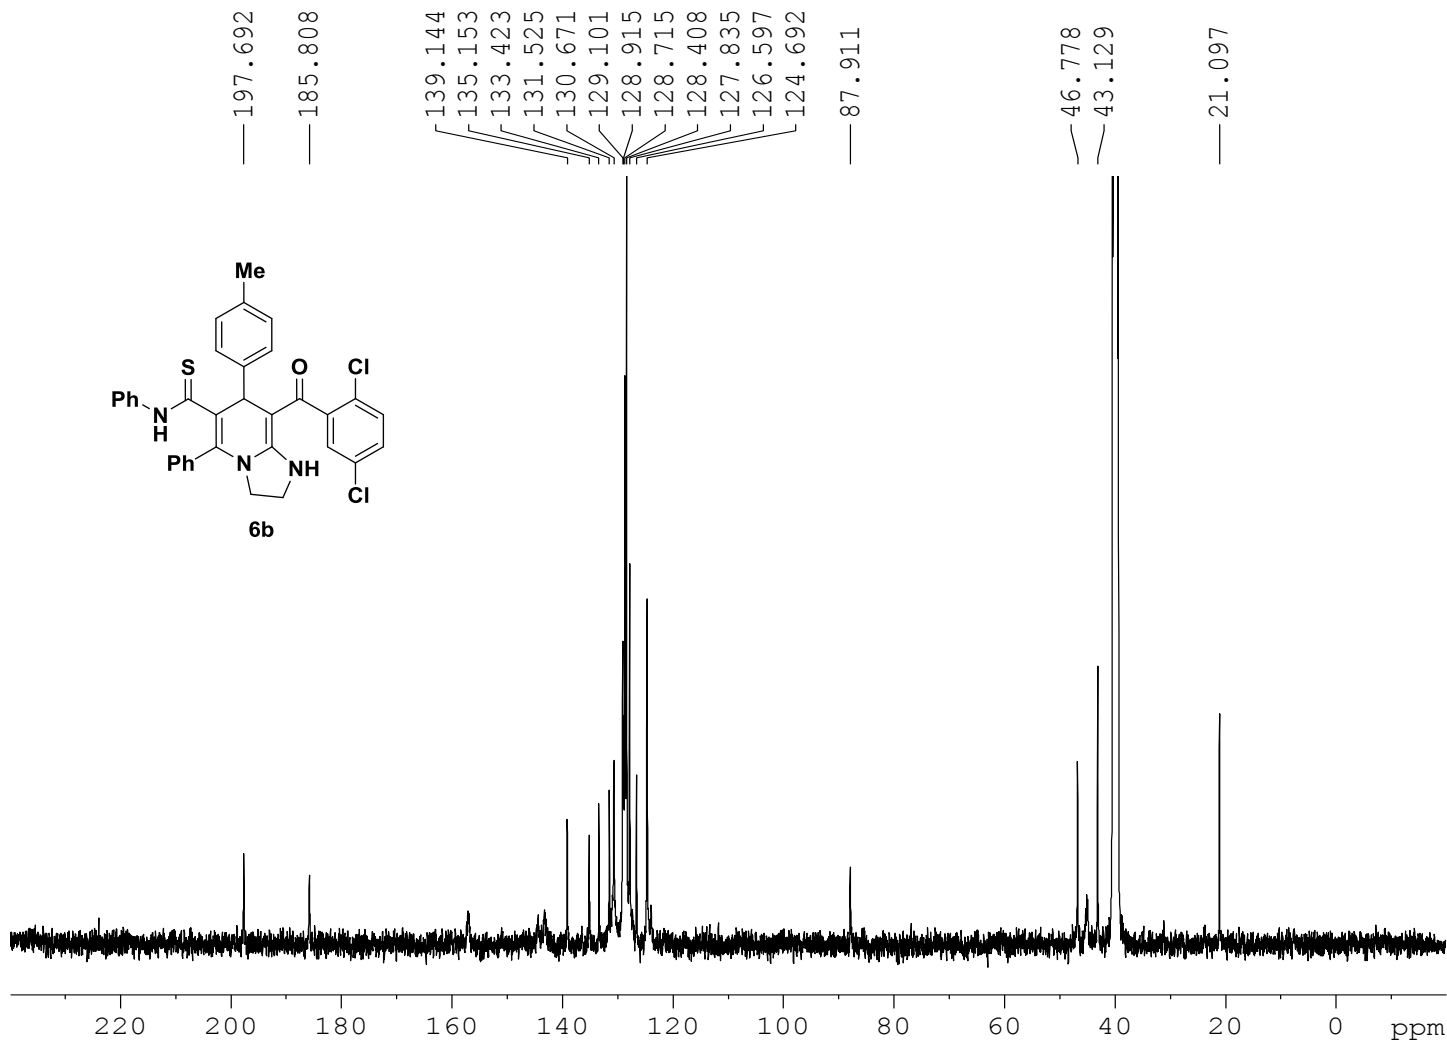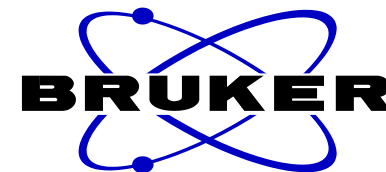

NAME SP-P-3  
EXPNO 2  
PROCNO 1  
Date\_ 20121226  
Time\_ 19.10  
INSTRUM spect  
PROBHD 5 mm PABBO BB-  
PULPROG zgpg30  
TD 65536  
SOLVENT DMSO  
NS 2365  
DS 2  
SWH 32679.738 Hz  
FIDRES 0.498653 Hz  
AQ 1.0027661 sec  
RG 11500  
DW 15.300 usec  
DE 6.00 usec  
TE 292.2 K  
D1 2.00000000 sec  
d11 0.03000000 sec  
DELTA 1.89999998 sec  
TD0 10

==== CHANNEL f1 =====  
NUC1 13C  
P1 12.20 usec  
PL1 3.00 dB  
SFO1 125.7464750 MHz

==== CHANNEL f2 =====  
CPDPRG2 waltz16  
NUC2 1H  
PCPD2 80.00 usec  
PL2 2.00 dB  
PL12 17.70 dB  
PL13 17.70 dB  
SFO2 500.0355000 MHz  
SI 32768  
SF 125.7326455 MHz  
WDW EM  
SSB 0  
LB 3.00 Hz  
GB 0  
PC 2.00

SP-P-2a 1H 1D 2013 1 11

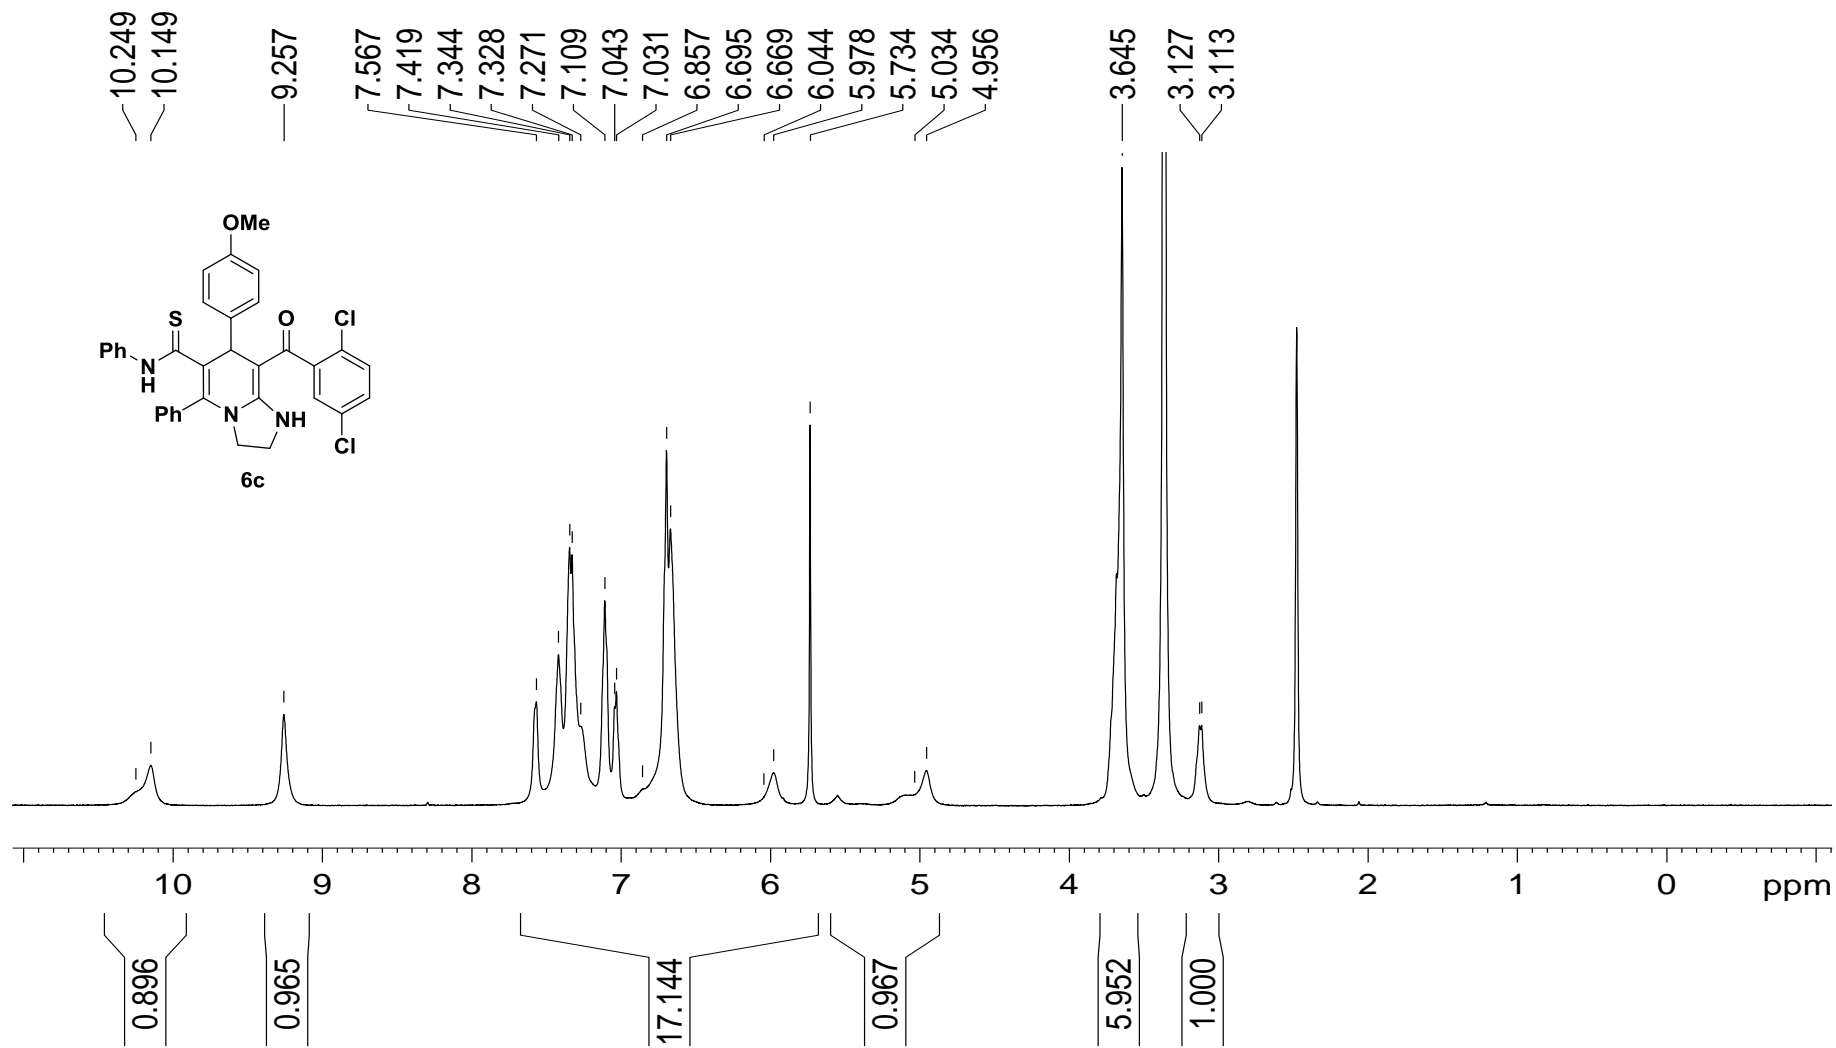

SP-P-2a 13C 1D 2013 01 17

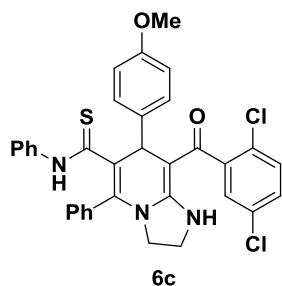

197.792

185.852

157.962

139.168

133.454

131.540

130.674

129.089

128.923

128.630

128.405

126.583

124.704

113.586

88.021

55.428

46.785

43.123

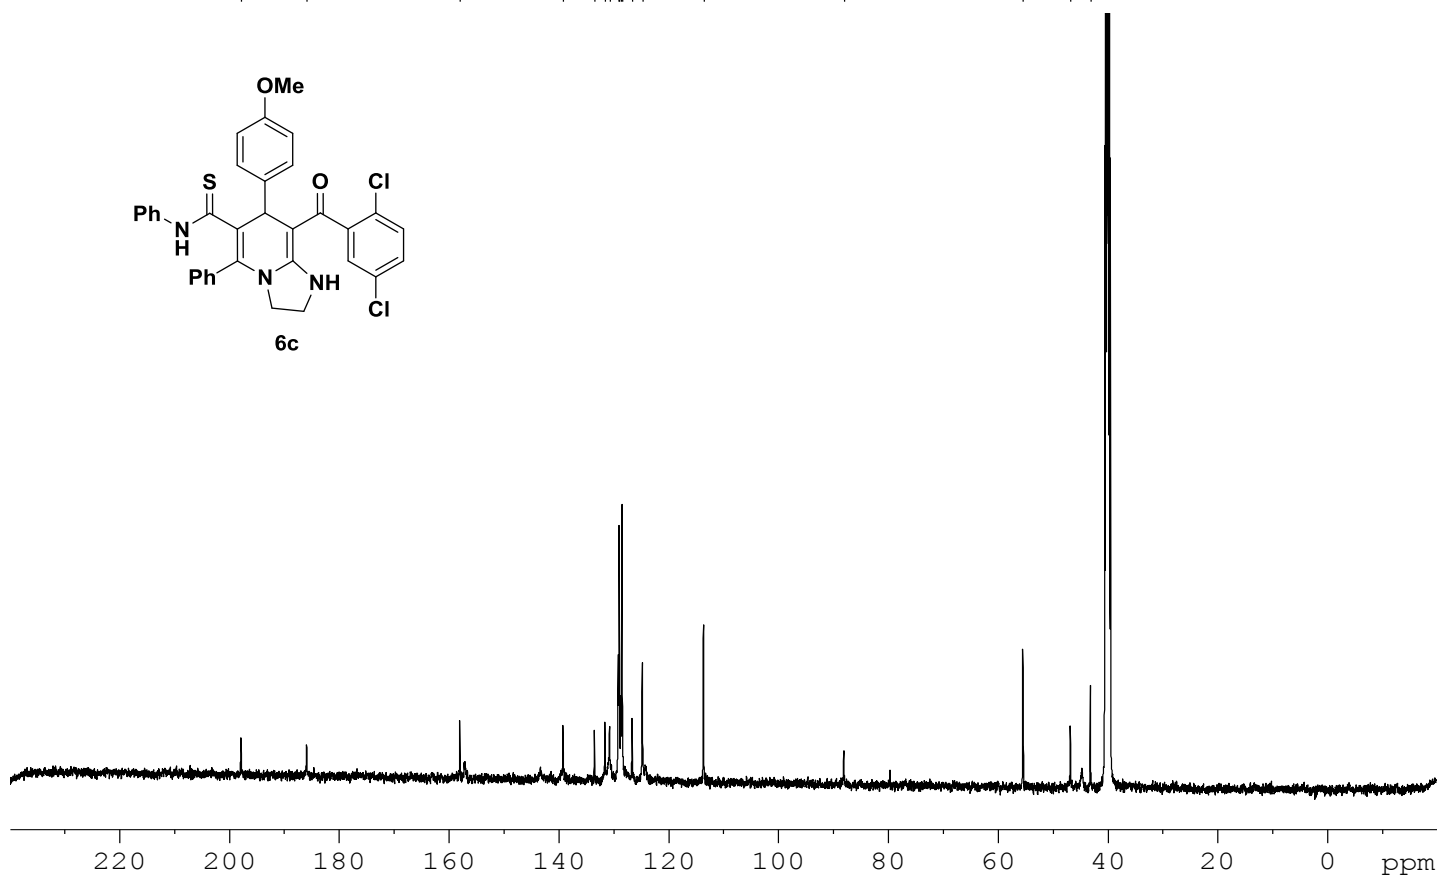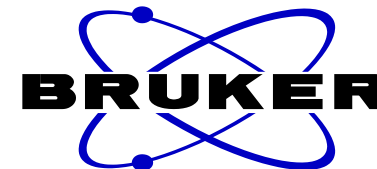

NAME SP-P-2a  
EXPNO 2  
PROCNO 1  
Date\_ 20130117  
Time\_ 16.15  
INSTRUM spect  
PROBHD 5 mm PABBO BB-  
PULPROG zgpg30  
TD 65536  
SOLVENT DMSO  
NS 2245  
DS 2  
SWH 32679.738 Hz  
FIDRES 0.498653 Hz  
AQ 1.0027661 sec  
RG 5790  
DW 15.300 usec  
DE 6.00 usec  
TE 294.6 K  
D1 2.00000000 sec  
d11 0.03000000 sec  
DELTA 1.89999998 sec  
TD0 8

===== CHANNEL f1 =====  
NUC1 13C  
P1 12.20 usec  
PL1 3.00 dB  
SFO1 125.7464750 MHz

===== CHANNEL f2 =====  
CPDPRG2 waltz16  
NUC2 1H  
PCPD2 80.00 usec  
PL2 2.00 dB  
PL12 17.70 dB  
PL13 17.70 dB  
SFO2 500.0355000 MHz  
SI 32768  
SF 125.7326455 MHz  
WDW EM  
SSB 0  
LB 3.00 Hz  
GB 0  
PC 2.00

SP-P-9 1H 1D 2013 04 23

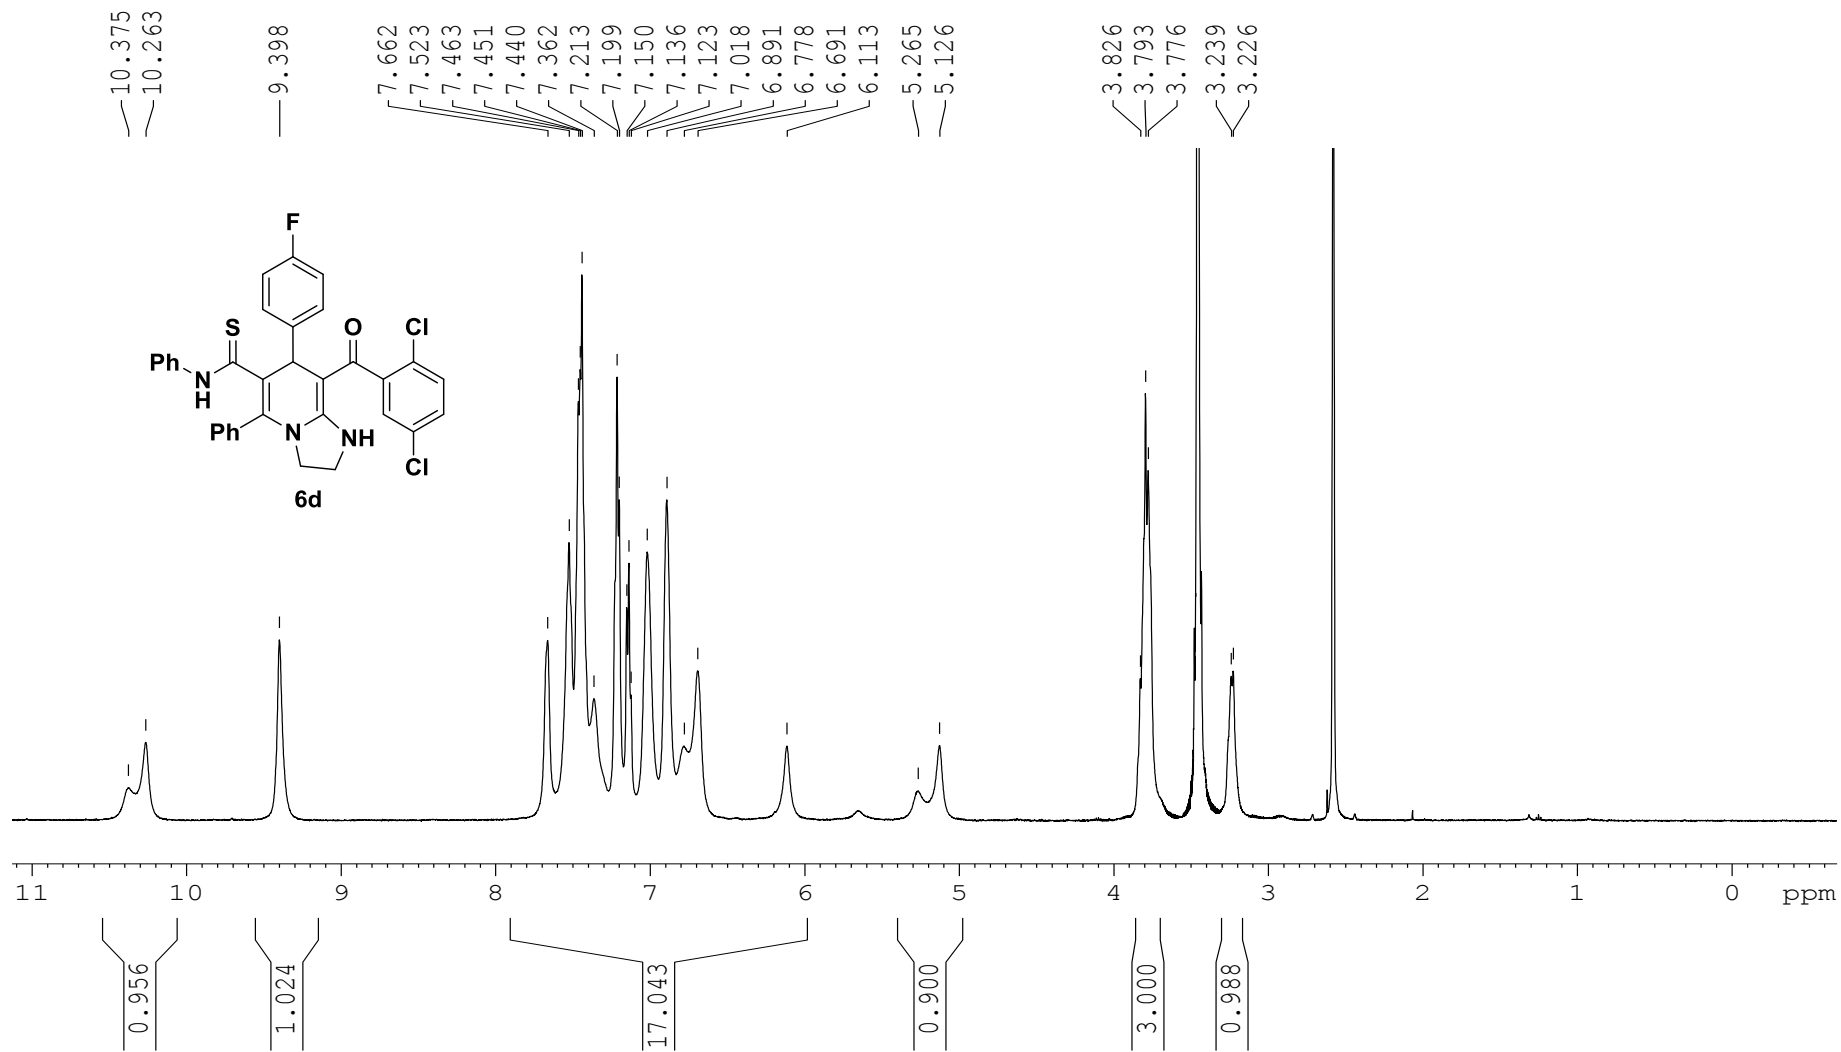



SP-P-9

13C

2013 04 28

197.634  
185.780  
162.075  
160.151  
156.947  
143.248  
139.085  
133.320  
131.608  
130.604  
129.695  
129.156  
128.974  
128.633  
128.457  
127.225  
126.658  
124.737  
123.548  
114.803  
114.638  
87.604

46.748  
43.149

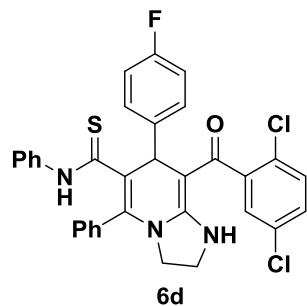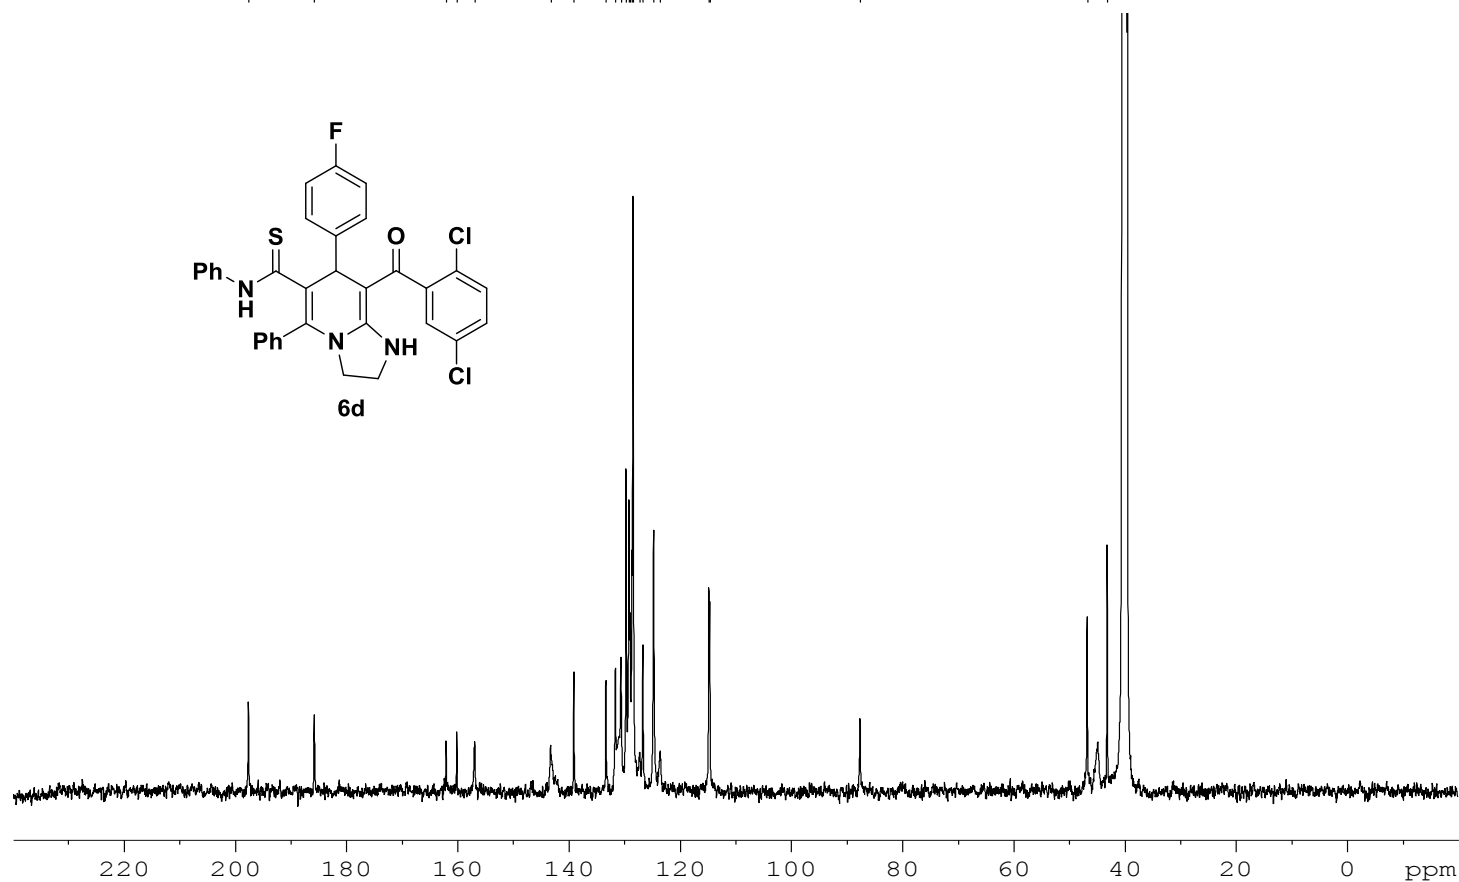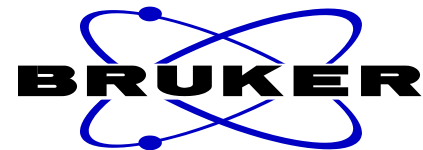

NAME SP-P-9  
EXPNO 2  
PROCNO 1  
Date\_ 20130428  
Time\_ 17.48  
INSTRUM spect  
PROBHD 5 mm PABBO BB-  
PULPROG zgpg30  
TD 65536  
SOLVENT DMSO  
NS 2780  
DS 2  
SWH 32679.738 Hz  
FIDRES 0.498653 Hz  
AQ 1.0027661 sec  
RG 1820  
DW 15.300 usec  
DE 6.00 usec  
TE 299.1 K  
D1 2.0000000 sec  
d11 0.0300000 sec  
DELTA 1.89999998 sec  
TD0 20

==== CHANNEL f1 =====  
NUC1 13C  
P1 12.20 usec  
PL1 3.00 dB  
SFO1 125.7464750 MHz

==== CHANNEL f2 =====  
CPDPRG2 waltz16  
NUC2 1H  
PCPD2 80.00 usec  
PL2 2.00 dB  
PL12 17.70 dB  
PL13 17.70 dB  
SFO2 500.0355000 MHz  
SI 32768  
SF 125.7326474 MHz  
WDW EM  
SSB 0  
LB 8.00 Hz  
GB 0  
PC 1.00

SP-P-1b 1H 1D 2013 1 11

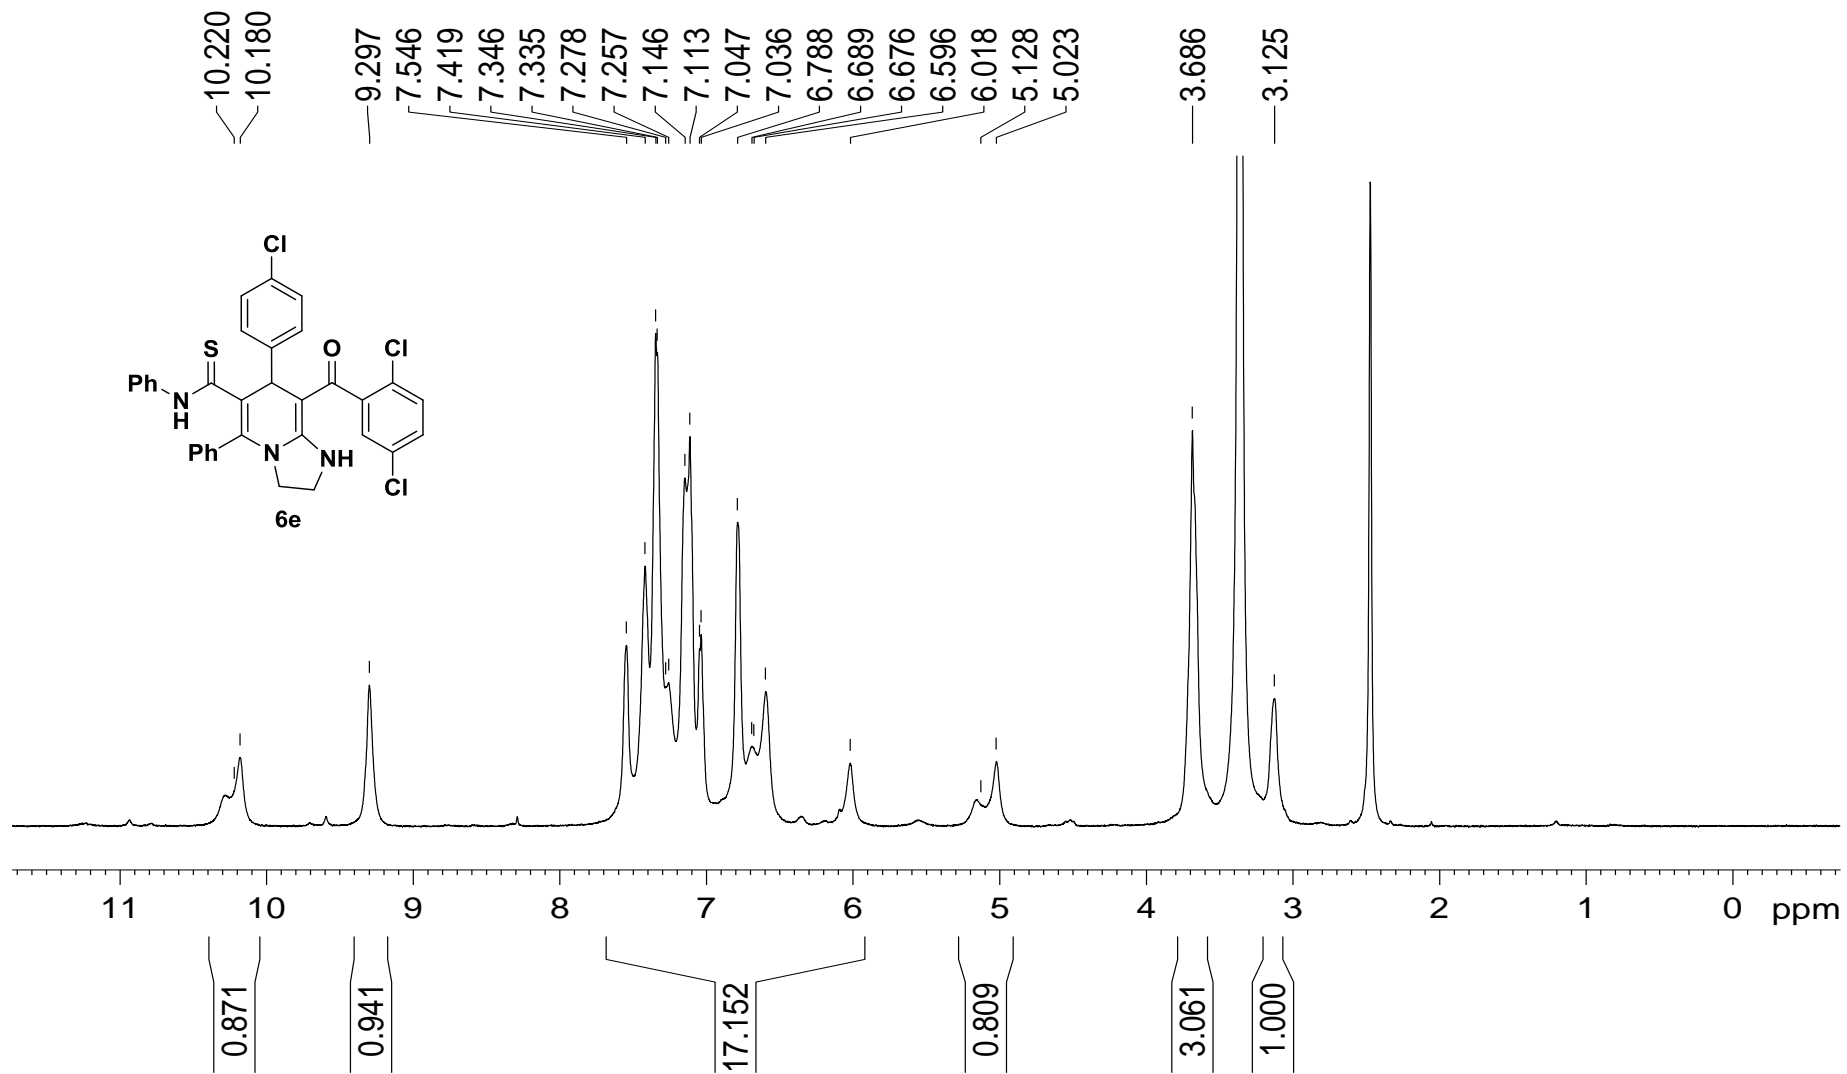

SP-P-1b

13C 1D 2013 01 18

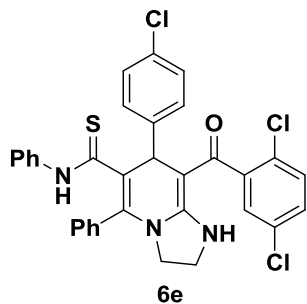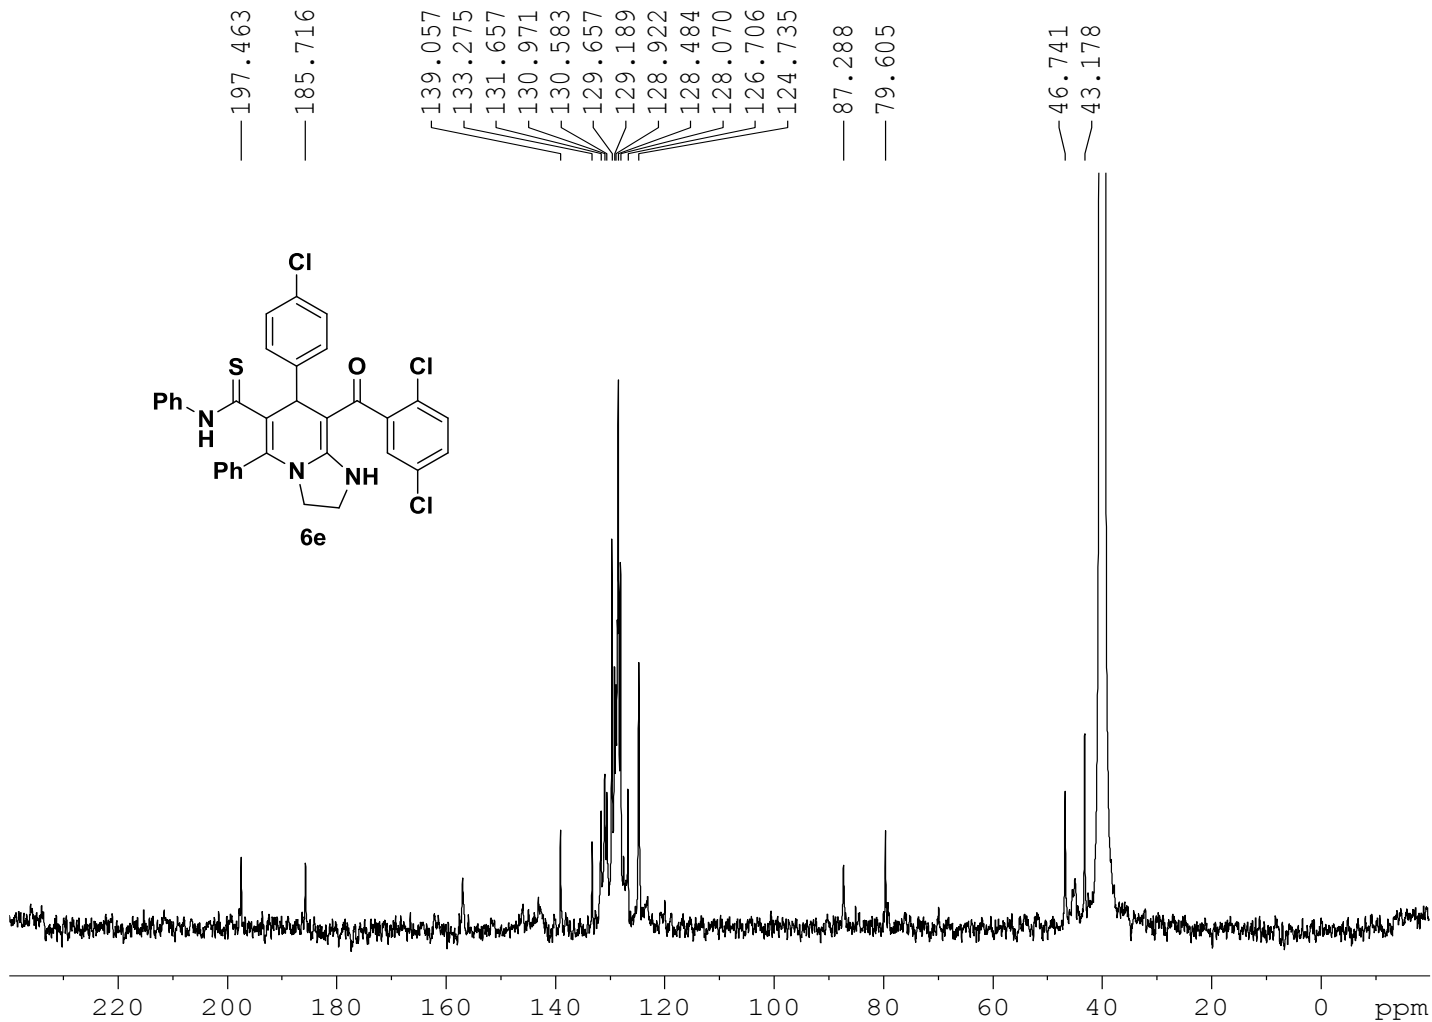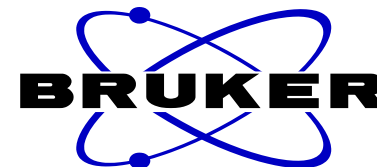

NAME SP-P-1b  
EXPNO 21  
PROCNO 1  
Date\_ 20130118  
Time 14.44  
INSTRUM spect  
PROBHD 5 mm PABBO BB-  
PULPROG zgpg30  
TD 65536  
SOLVENT DMSO  
NS 5326  
DS 2  
SWH 32679.738 Hz  
FIDRES 0.498653 Hz  
AQ 1.0027661 sec  
RG 5790  
DW 15.300 usec  
DE 6.00 usec  
TE 673.2 K  
D1 2.00000000 sec  
d11 0.03000000 sec  
DELTA 1.89999998 sec  
TD0 10

===== CHANNEL f1 =====  
NUC1 13C  
P1 12.20 usec  
PL1 3.00 dB  
SFO1 125.7464750 MHz

===== CHANNEL f2 =====  
CPDPRG2 waltz16  
NUC2 1H  
PCPD2 80.00 usec  
PL2 2.00 dB  
PL12 17.70 dB  
PL13 17.70 dB  
SFO2 500.0355000 MHz  
SI 32768  
SF 125.7326455 MHz  
WDW EM  
SSB 0  
LB 12.00 Hz  
GB 0  
PC 2.00

SP-P-8 1H 1D 2013 04 23

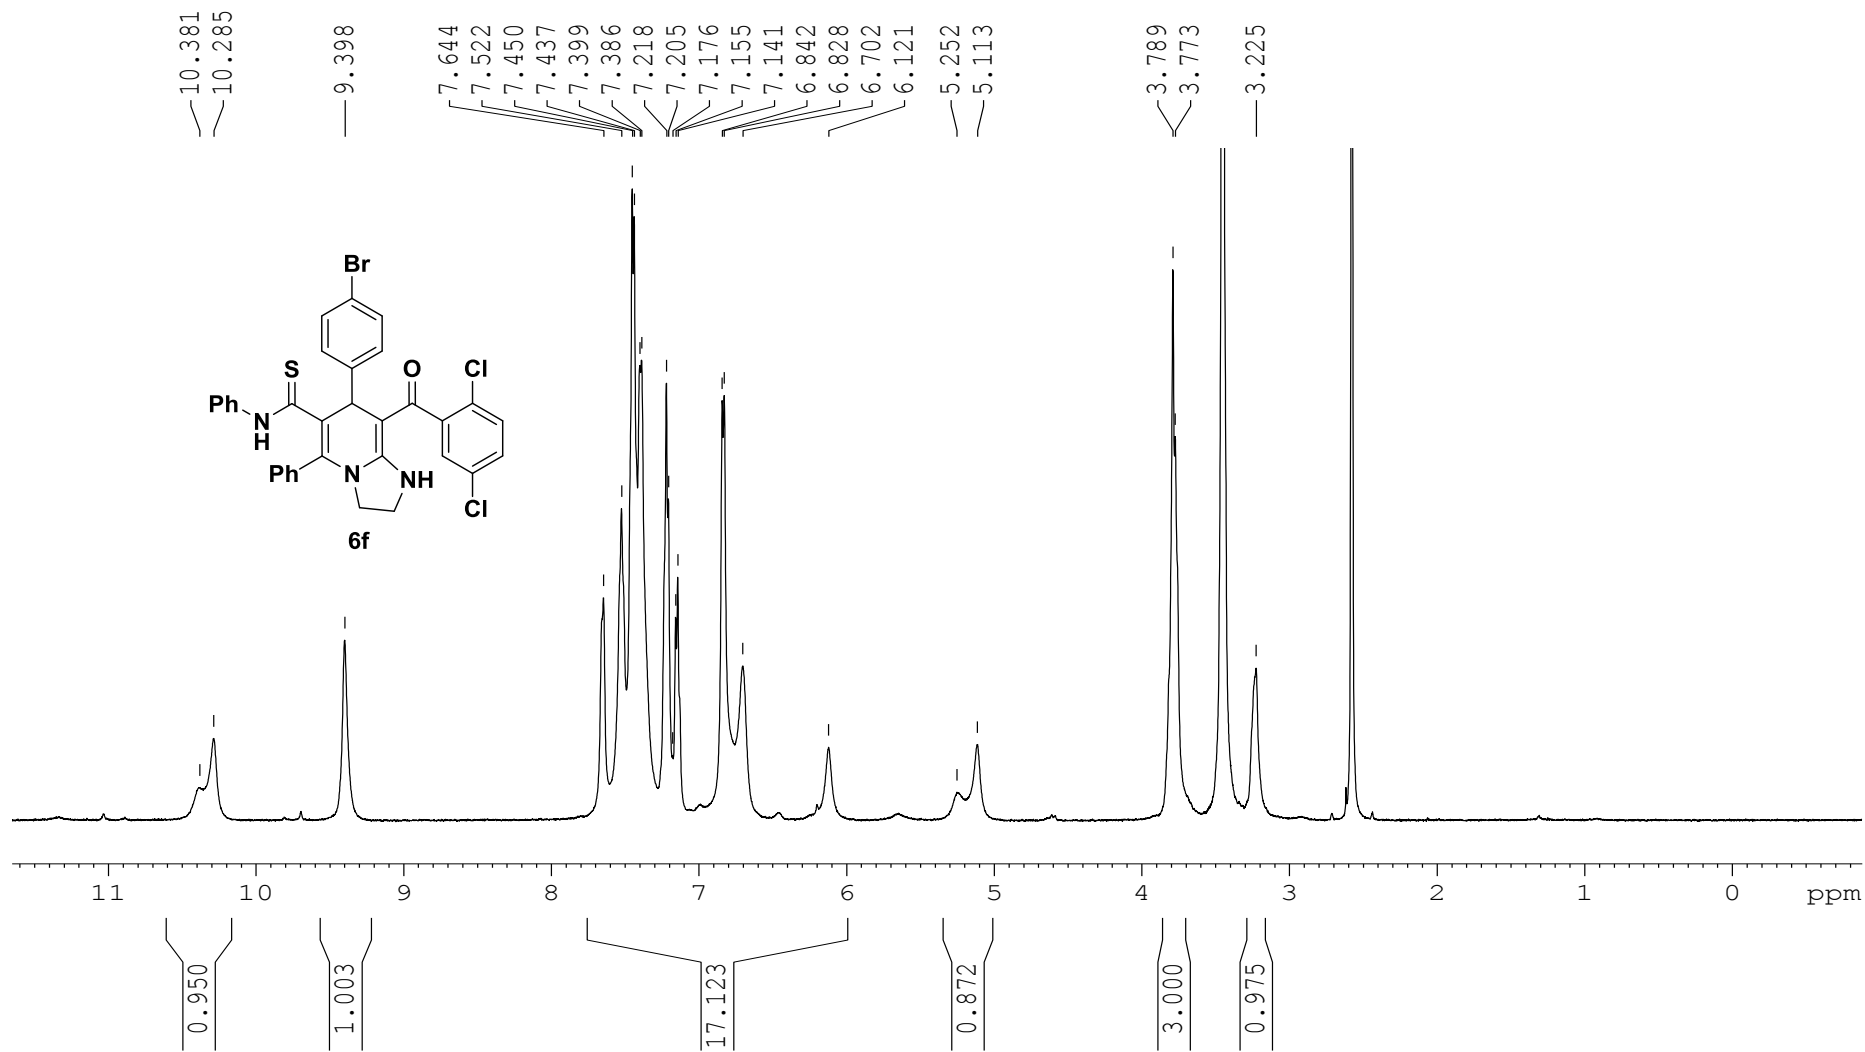

SP-P-8

13C

2013 04 24

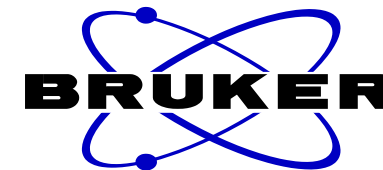

197.456  
185.736  
156.972  
139.074  
133.283  
131.673  
130.999  
130.591  
130.052  
129.203  
128.927  
128.679  
128.495  
126.716  
124.741  
119.553  
87.252

46.758  
43.191

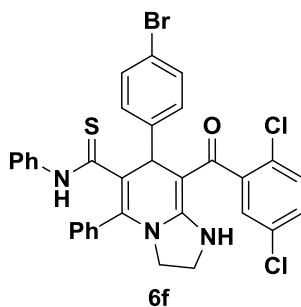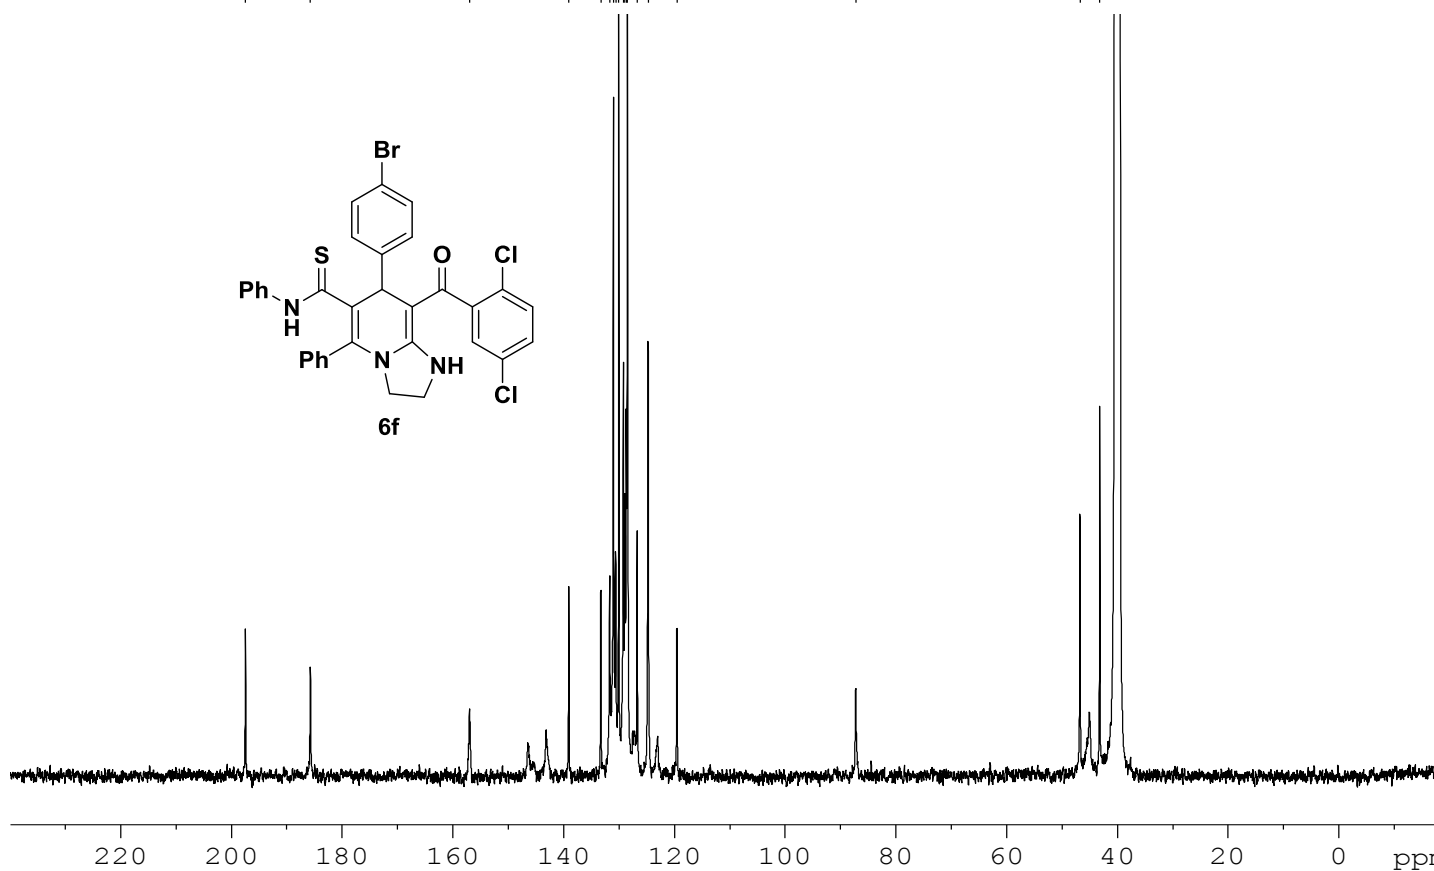

NAME SP-P-8  
EXPNO 2  
PROCNO 1  
Date\_ 20130424  
Time\_ 22.57  
INSTRUM spect  
PROBHD 5 mm PABBO BB-  
PULPROG zgpg30  
TD 65536  
SOLVENT DMSO  
NS 13565  
DS 2  
SWH 32679.738 Hz  
FIDRES 0.498653 Hz  
AQ 1.0027661 sec  
RG 1820  
DW 15.300 usec  
DE 6.00 usec  
TE 296.4 K  
D1 2.00000000 sec  
d11 0.03000000 sec  
DELTA 1.89999998 sec  
TD0 20

==== CHANNEL f1 =====  
NUC1 13C  
P1 12.20 usec  
PL1 3.00 dB  
SFO1 125.7464750 MHz

==== CHANNEL f2 =====  
CPDPRG2 waltz16  
NUC2 1H  
PCPD2 80.00 usec  
PL2 2.00 dB  
PL12 17.70 dB  
PL13 17.70 dB  
SFO2 500.0355000 MHz  
SI 32768  
SF 125.7326450 MHz  
WDW EM  
SSB 0  
LB 6.00 Hz  
GB 0  
PC 1.00

SP-P-6 1H 1D 2013 04 15

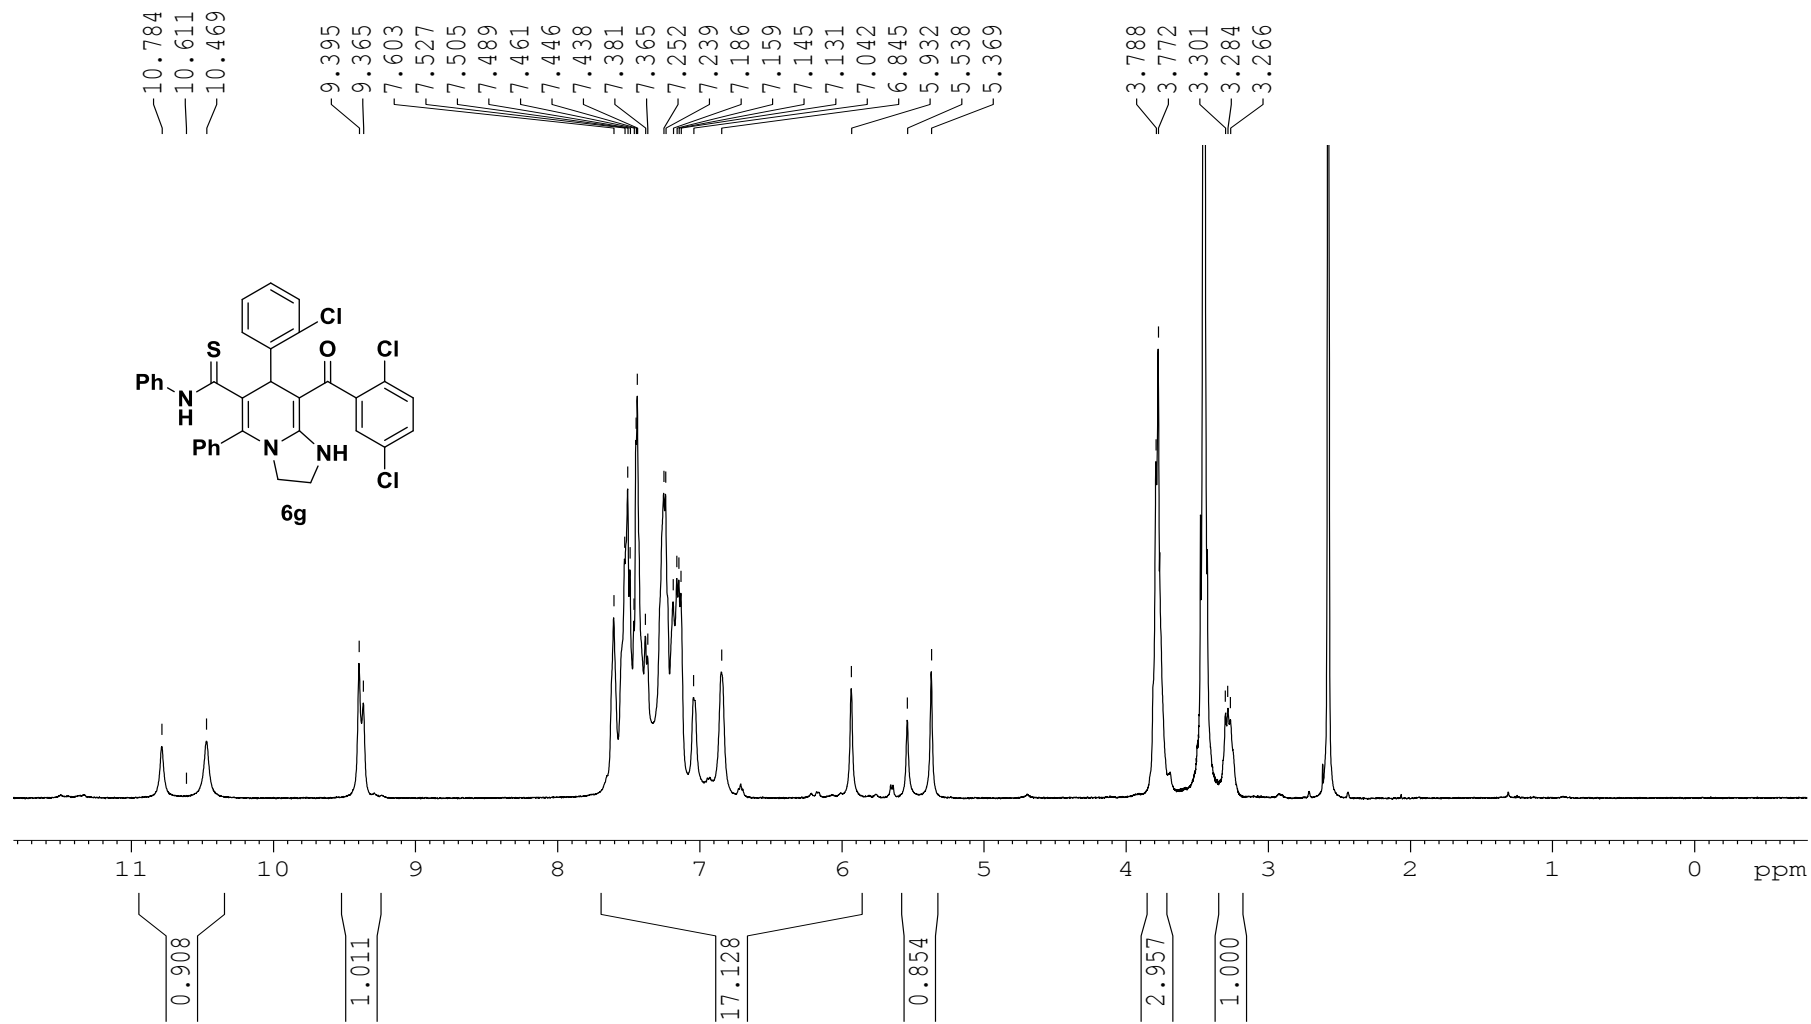

SP-P-6

13C

2013 04 27

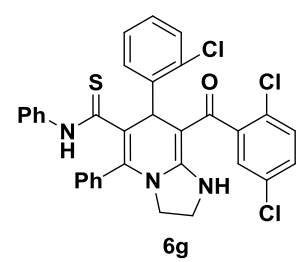

197.094  
185.608  
157.455  
143.307  
139.295  
133.220  
131.818  
131.113  
130.542  
129.089  
128.778  
128.495  
127.879  
126.512  
124.777  
124.403  
88.433

46.702  
43.251

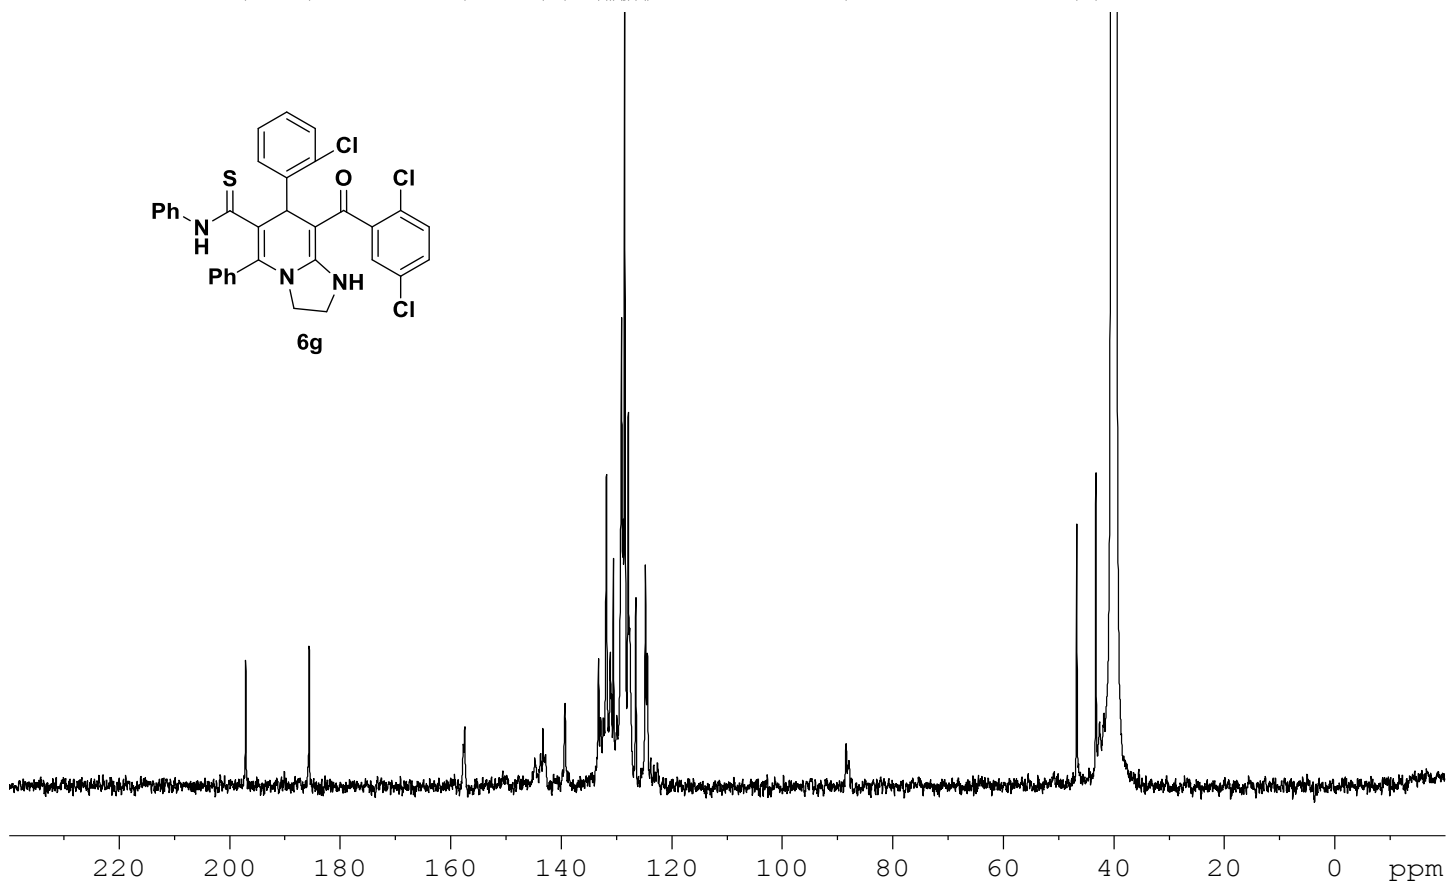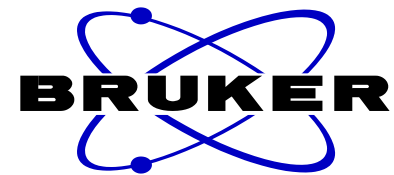

```
NAME          SP-P-6
EXPNO         2
PROCNO        1
Date_         20130427
Time_         21.27
INSTRUM       spect
PROBHD        5 mm PABBO BB-
PULPROG       zgpg30
TD            65536
SOLVENT       DMSO
NS            11755
DS            2
SWH           32679.738 Hz
FIDRES        0.498653 Hz
AQ            1.0027661 sec
RG            1820
DW            15.300 usec
DE            6.00 usec
TE            296.7 K
D1            2.00000000 sec
d11           0.03000000 sec
DELTA         1.89999998 sec
TD0           20

===== CHANNEL f1 =====
NUC1           13C
P1             12.20 usec
PL1            3.00 dB
SFO1          125.7464750 MHz

===== CHANNEL f2 =====
CPDPRG2       waltz16
NUC2           1H
PCPD2         80.00 usec
PL2            2.00 dB
PL12           17.70 dB
PL13           17.70 dB
SFO2          500.0355000 MHz
SI            32768
SF            125.7326450 MHz
WDW            EM
SSB            0
LB             8.00 Hz
GB             0
PC             1.00
```

P-P-10 1H 1D 2013 04 2.

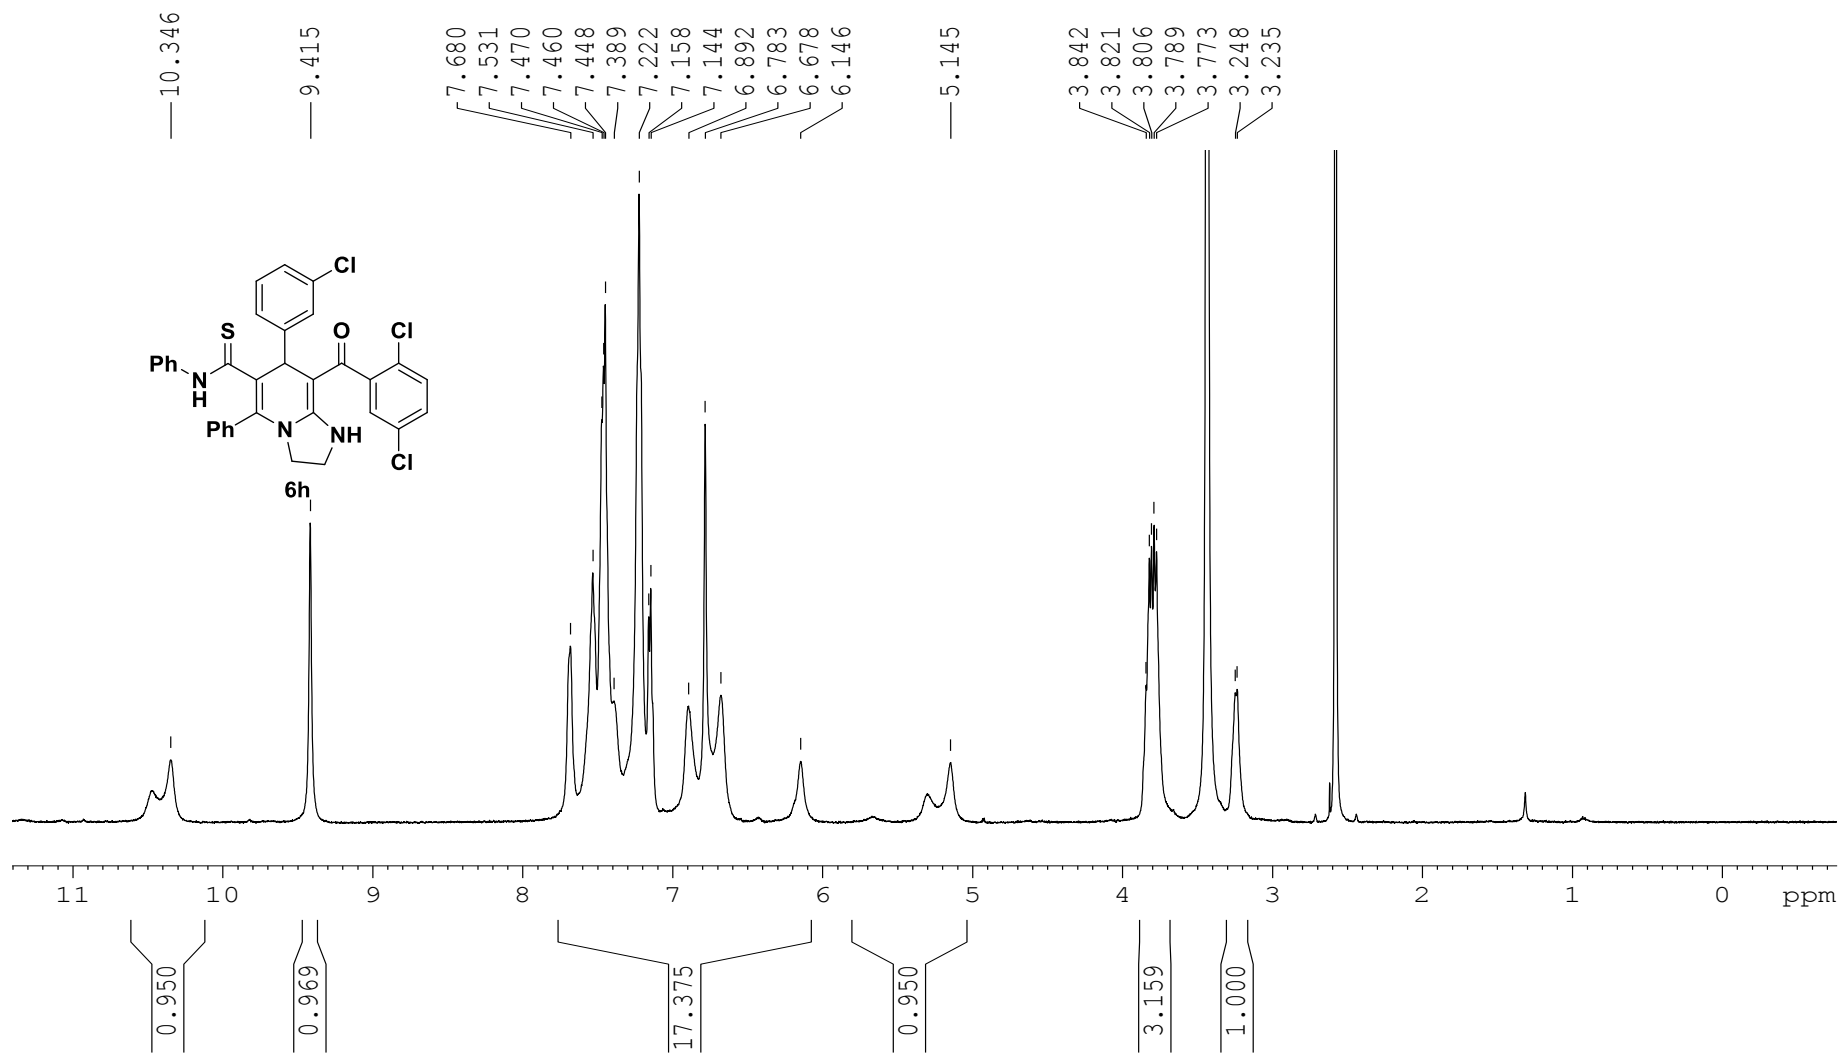



SP-P-10 13C 2013 05 01

197.446  
185.687  
156.903  
149.139  
143.071  
139.035  
133.223  
132.837  
131.710  
131.069  
130.621  
129.893  
129.200  
128.933  
128.483  
127.819  
126.687  
126.321  
124.720  
122.810

87.149

46.715  
45.462  
43.152  
40.489  
40.328  
40.164  
39.999  
39.833  
39.669  
39.506

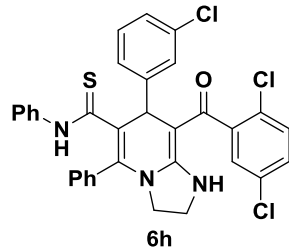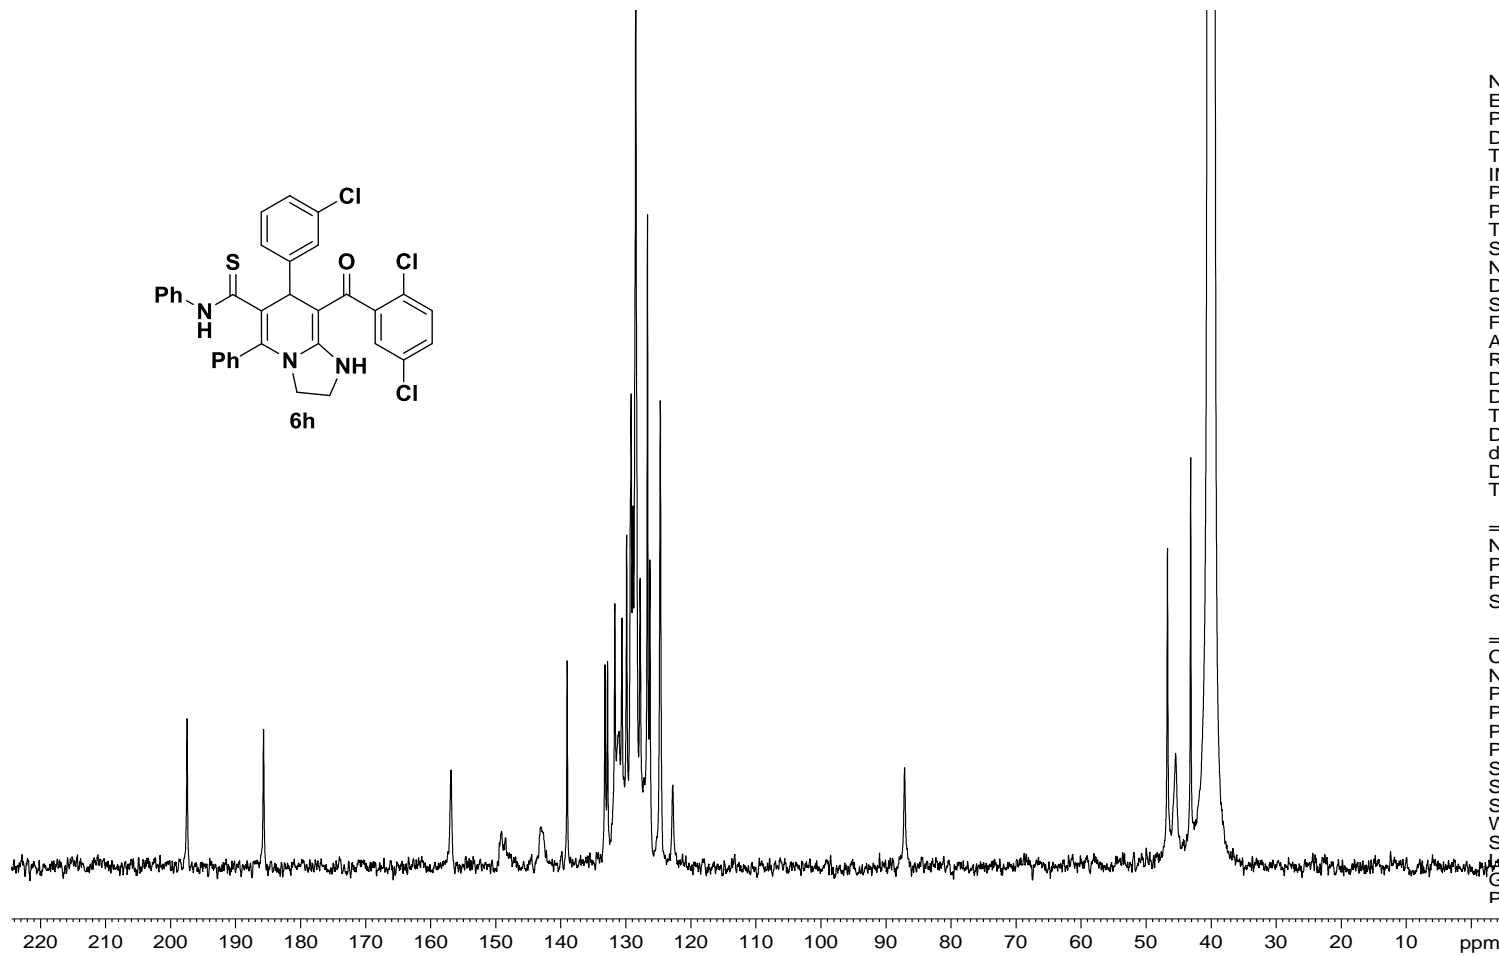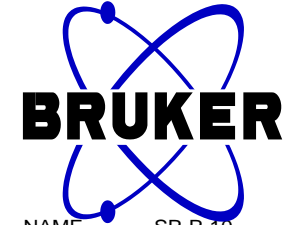

NAME SP-P-10  
EXPNO 2  
PROCNO 1  
Date\_ 20130501  
Time 18.28  
INSTRUM spect  
PROBHD 5 mm PABBO BB-  
PULPROG zgpg30  
TD 65536  
SOLVENT DMSO  
NS 15437  
DS 2  
SWH 32679.738 Hz  
FIDRES 0.498653 Hz  
AQ 1.0027661 sec  
RG 1820  
DW 15.300 usec  
DE 6.00 usec  
TE 299.2 K  
D1 2.00000000 sec  
d11 0.03000000 sec  
DELTA 1.89999998 sec  
TD0 20

===== CHANNEL f1 =====  
NUC1 13C  
P1 12.20 usec  
PL1 3.00 dB  
SFO1 125.7464750 MHz

===== CHANNEL f2 =====  
CPDPRG2 waltz16  
NUC2 1H  
PCPD2 80.00 usec  
PL2 2.00 dB  
PL12 17.70 dB  
PL13 17.70 dB  
SFO2 500.0355000 MHz  
SI 32768  
SF 125.7326495 MHz  
WDW EM  
SSB 0  
LB 12.00 Hz  
GB 0  
PC 2 00

ZKL-s-3d 1H 1D 2014 05 19

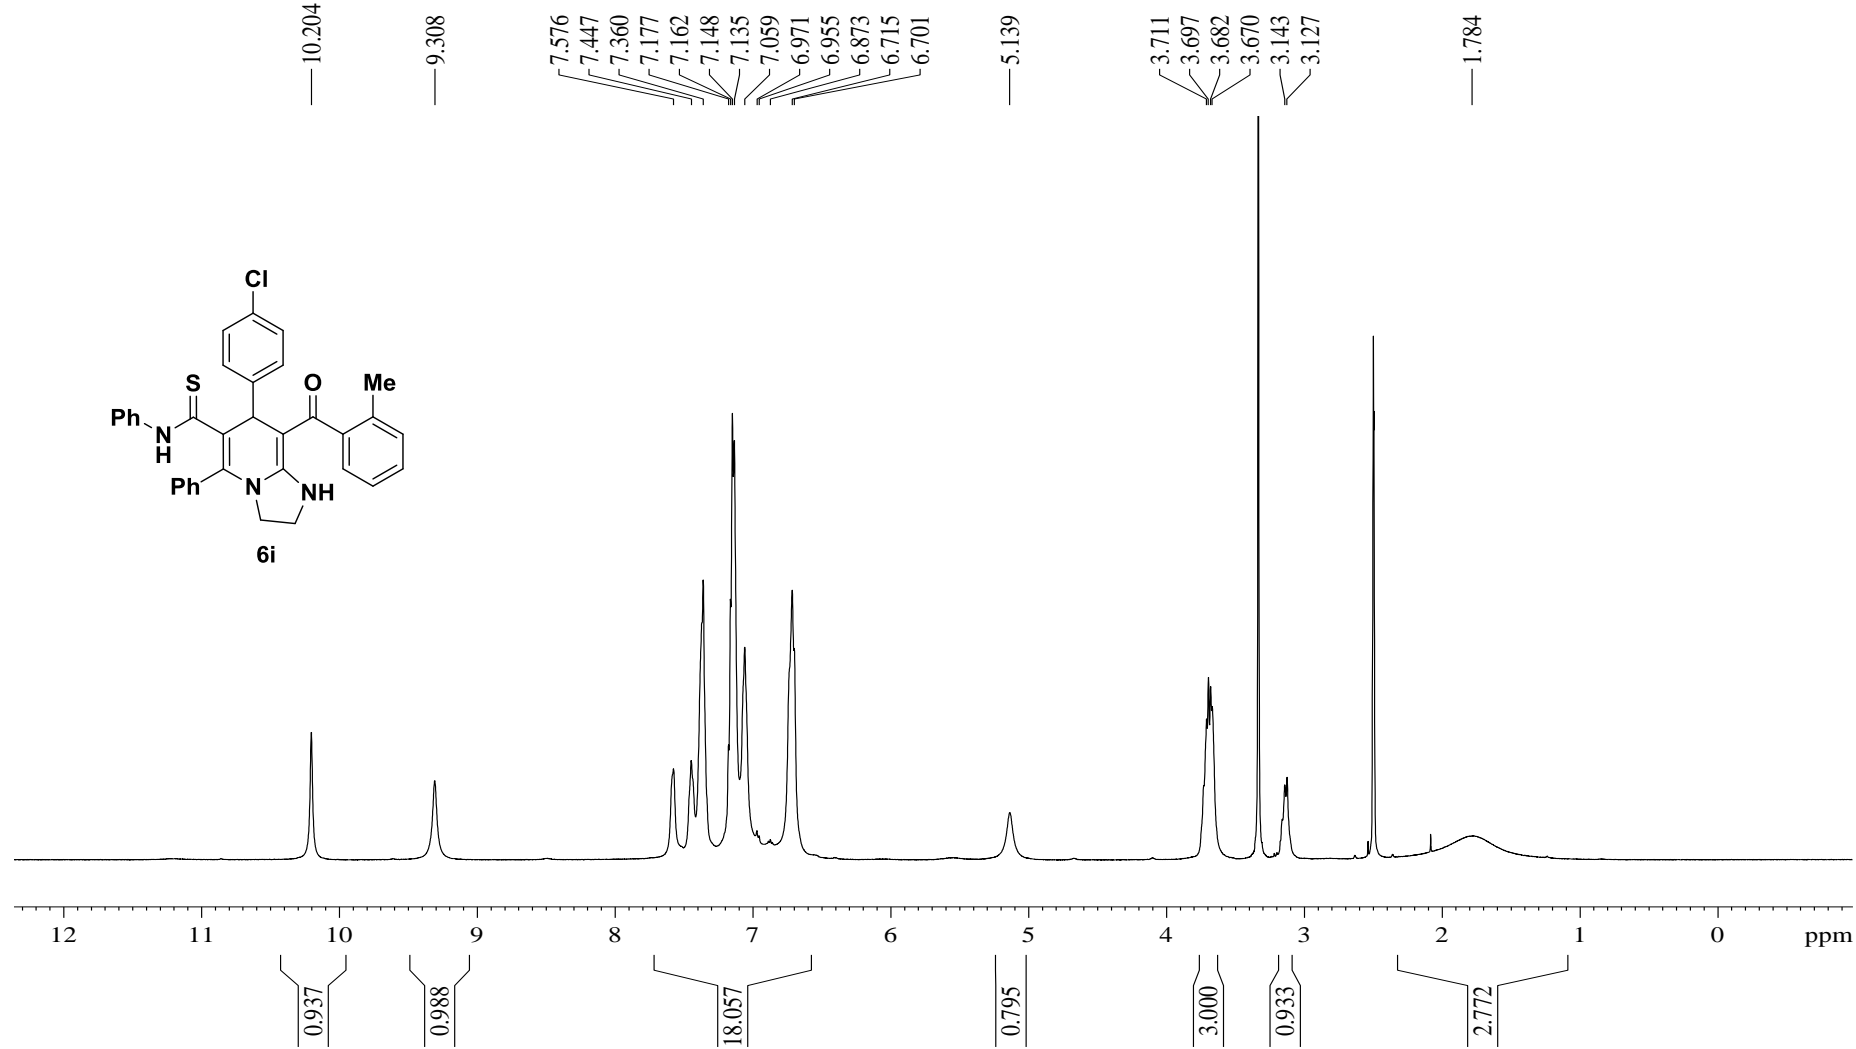

KL-S-3 13C 1D 2014 05 1

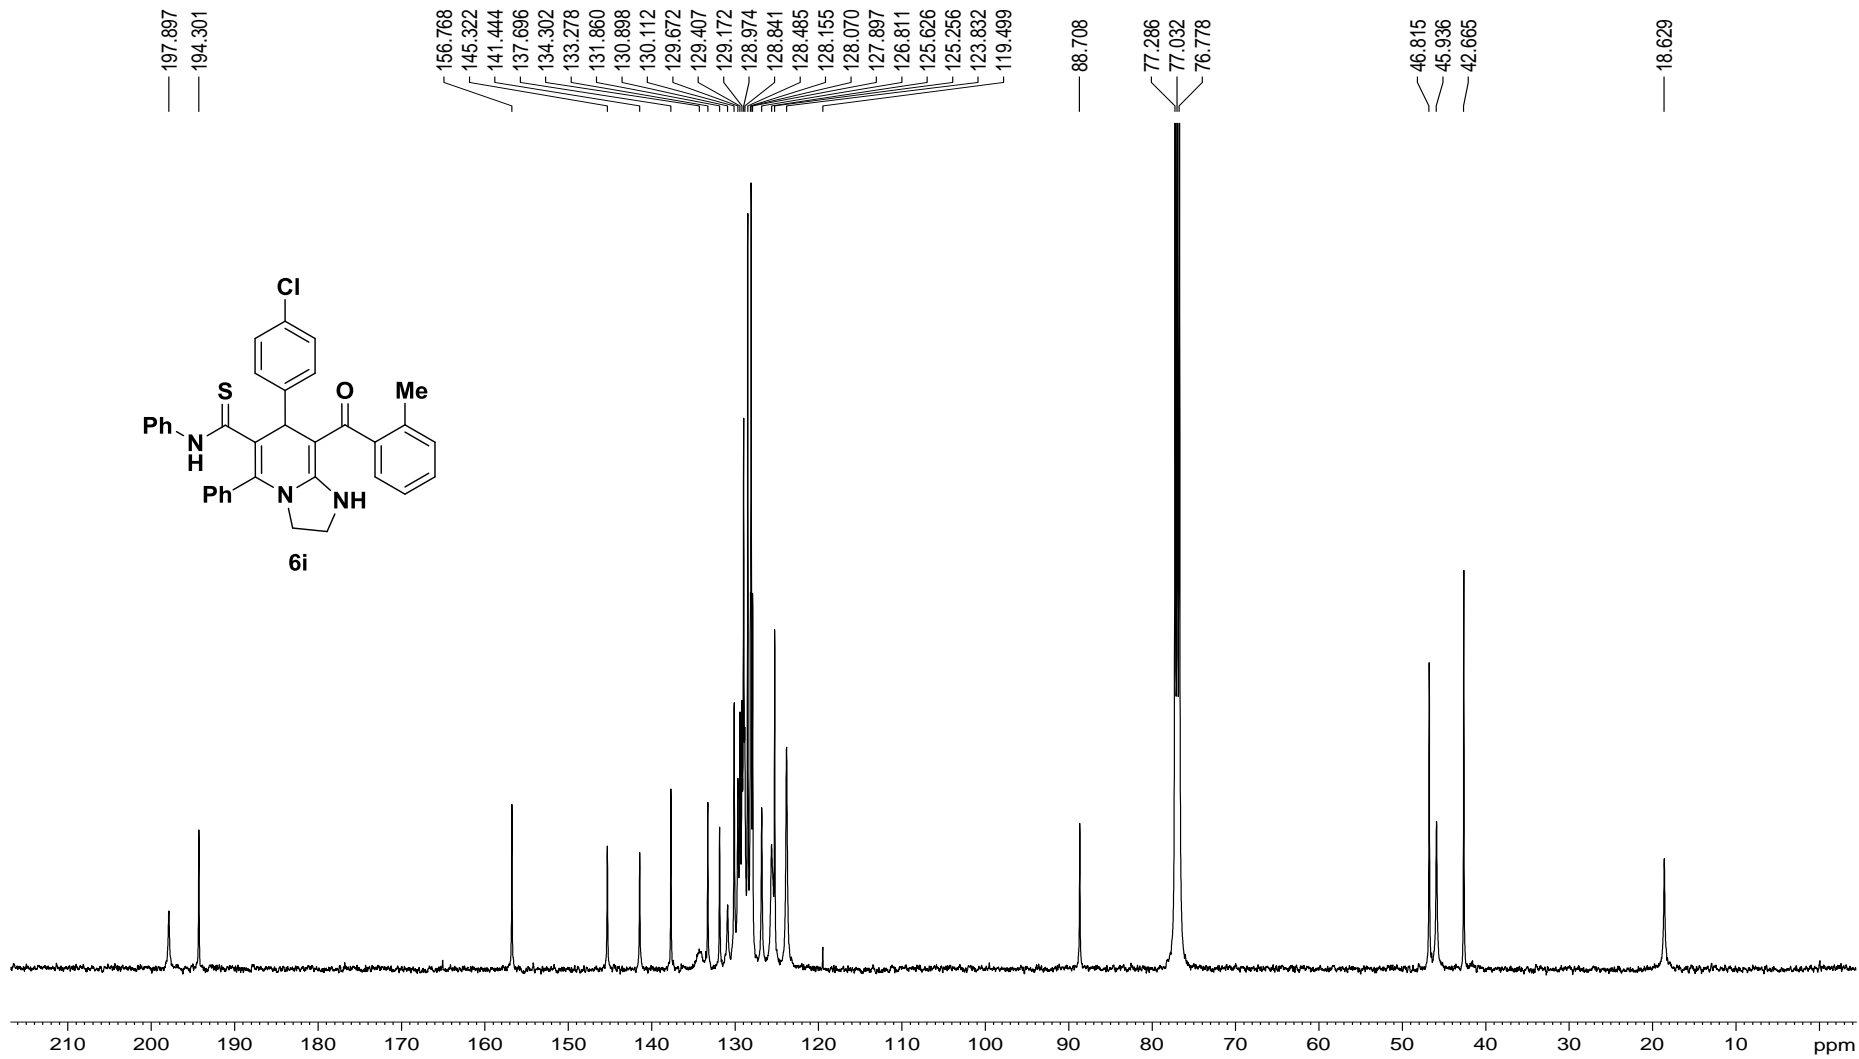

ZKL-S-2 1H 1D 2014 05 09

9.493

7.570

7.417

7.260

7.223

7.064

7.005

6.932

6.859

6.593

5.392

3.760

3.282

-0.001

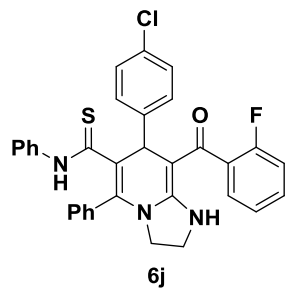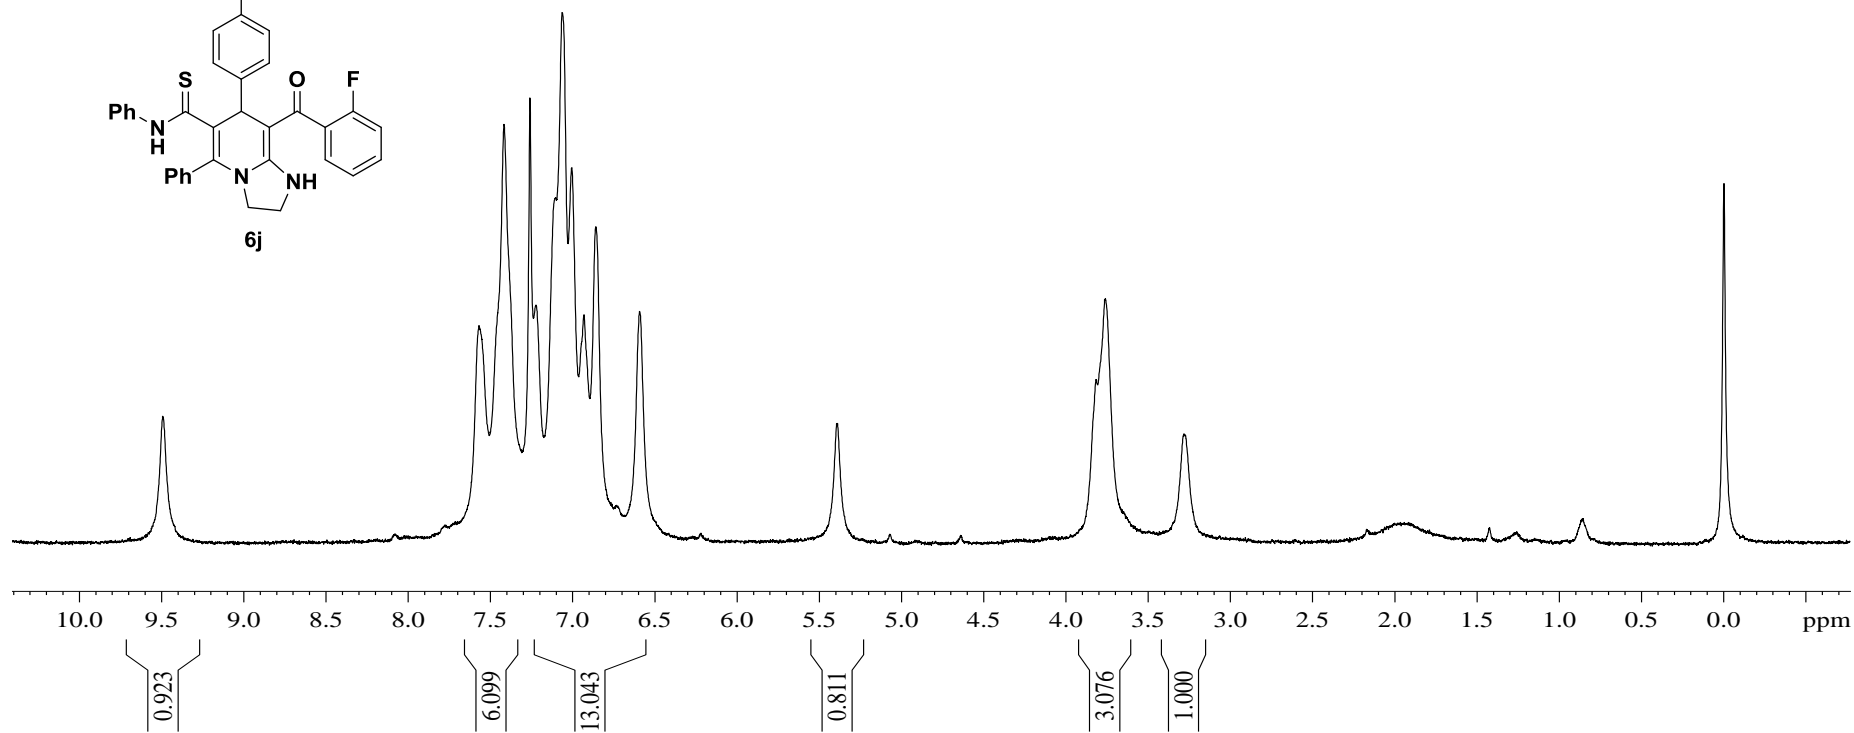

KL-s-2 13C 1D 2014 05 1

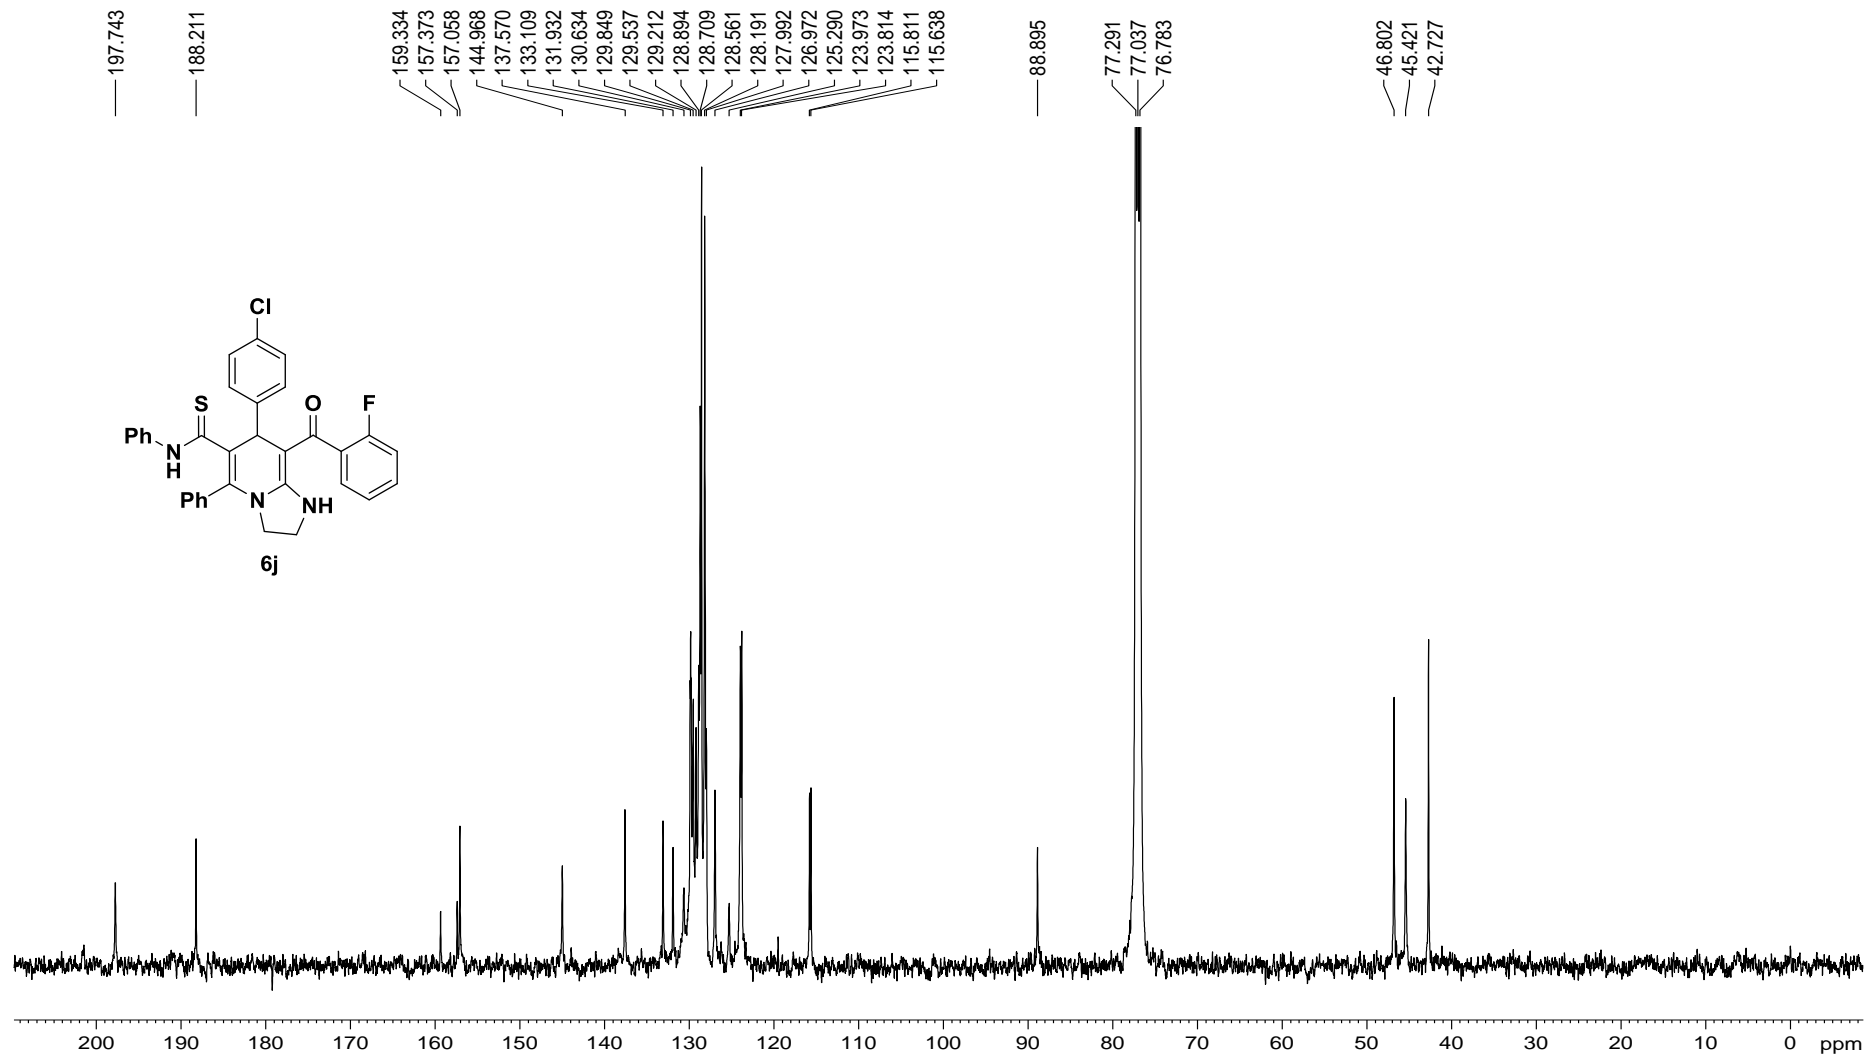

SP-P-4 1H 1D 2013 01 07

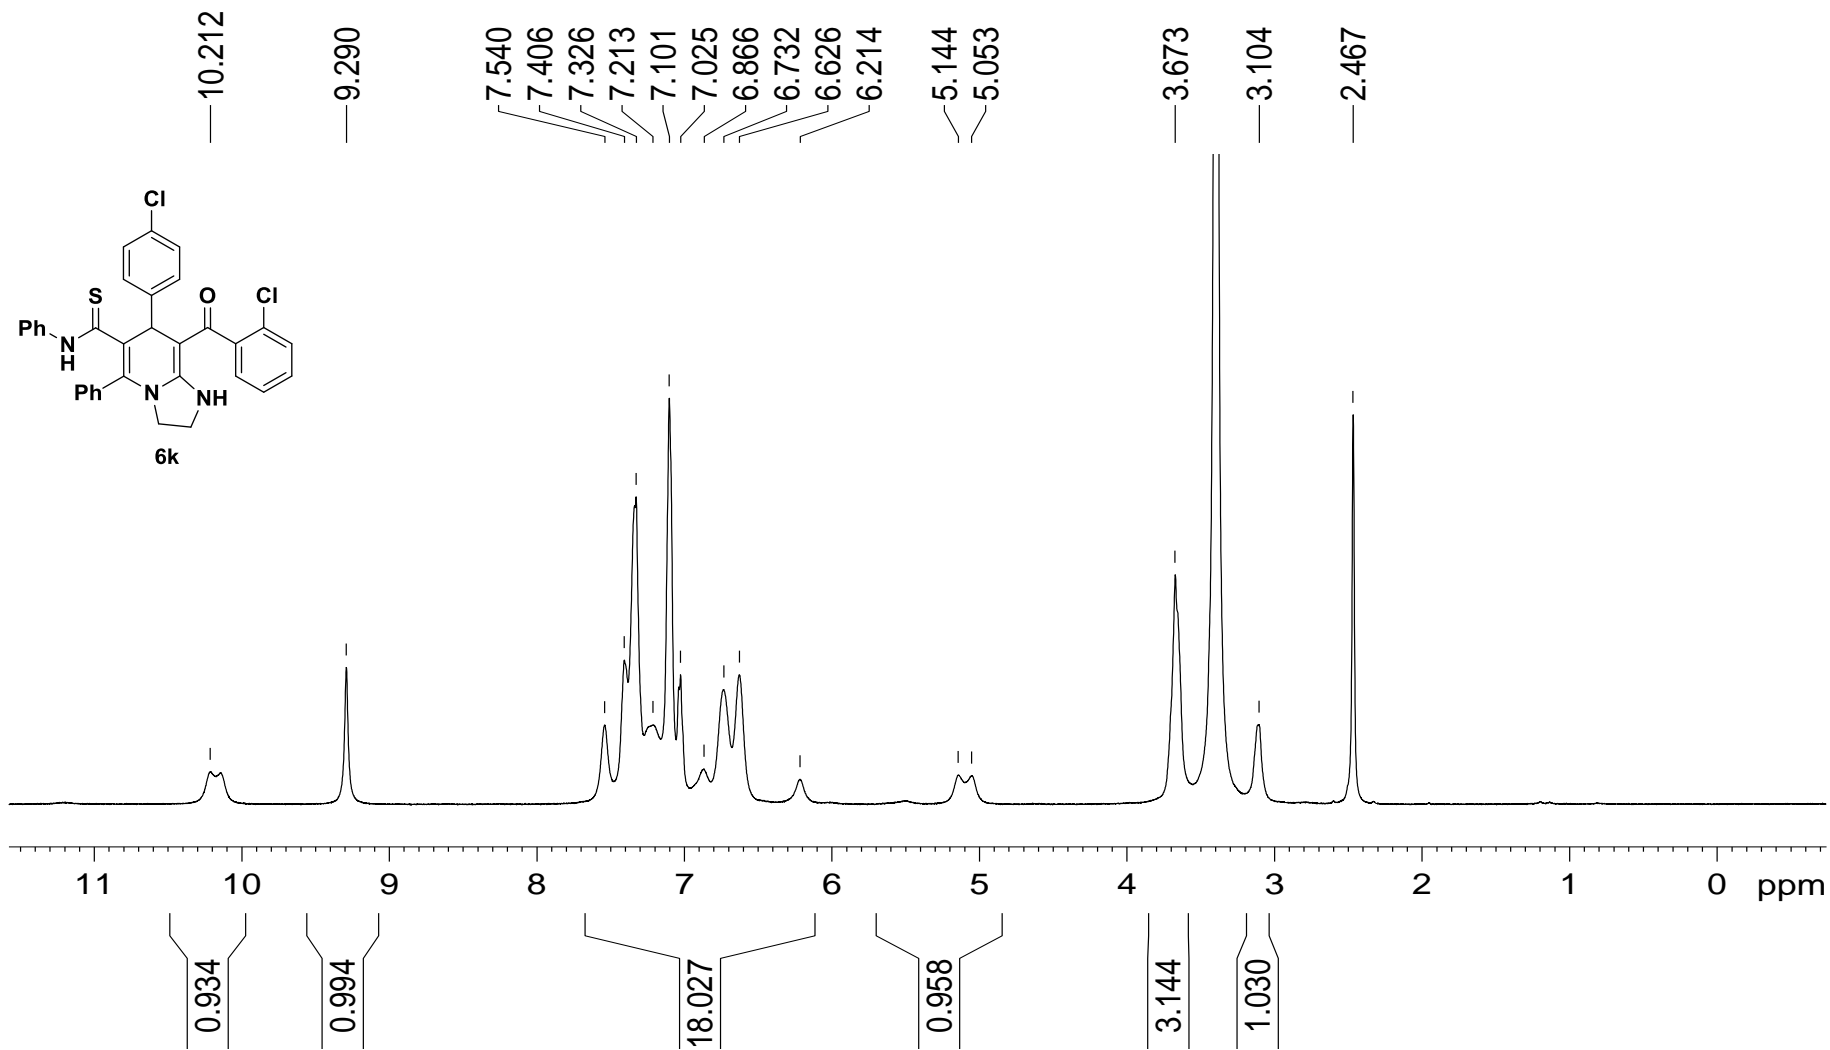

SP-P-4 13C 1D 2013 01 09

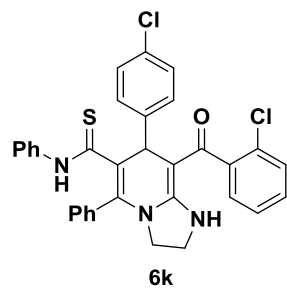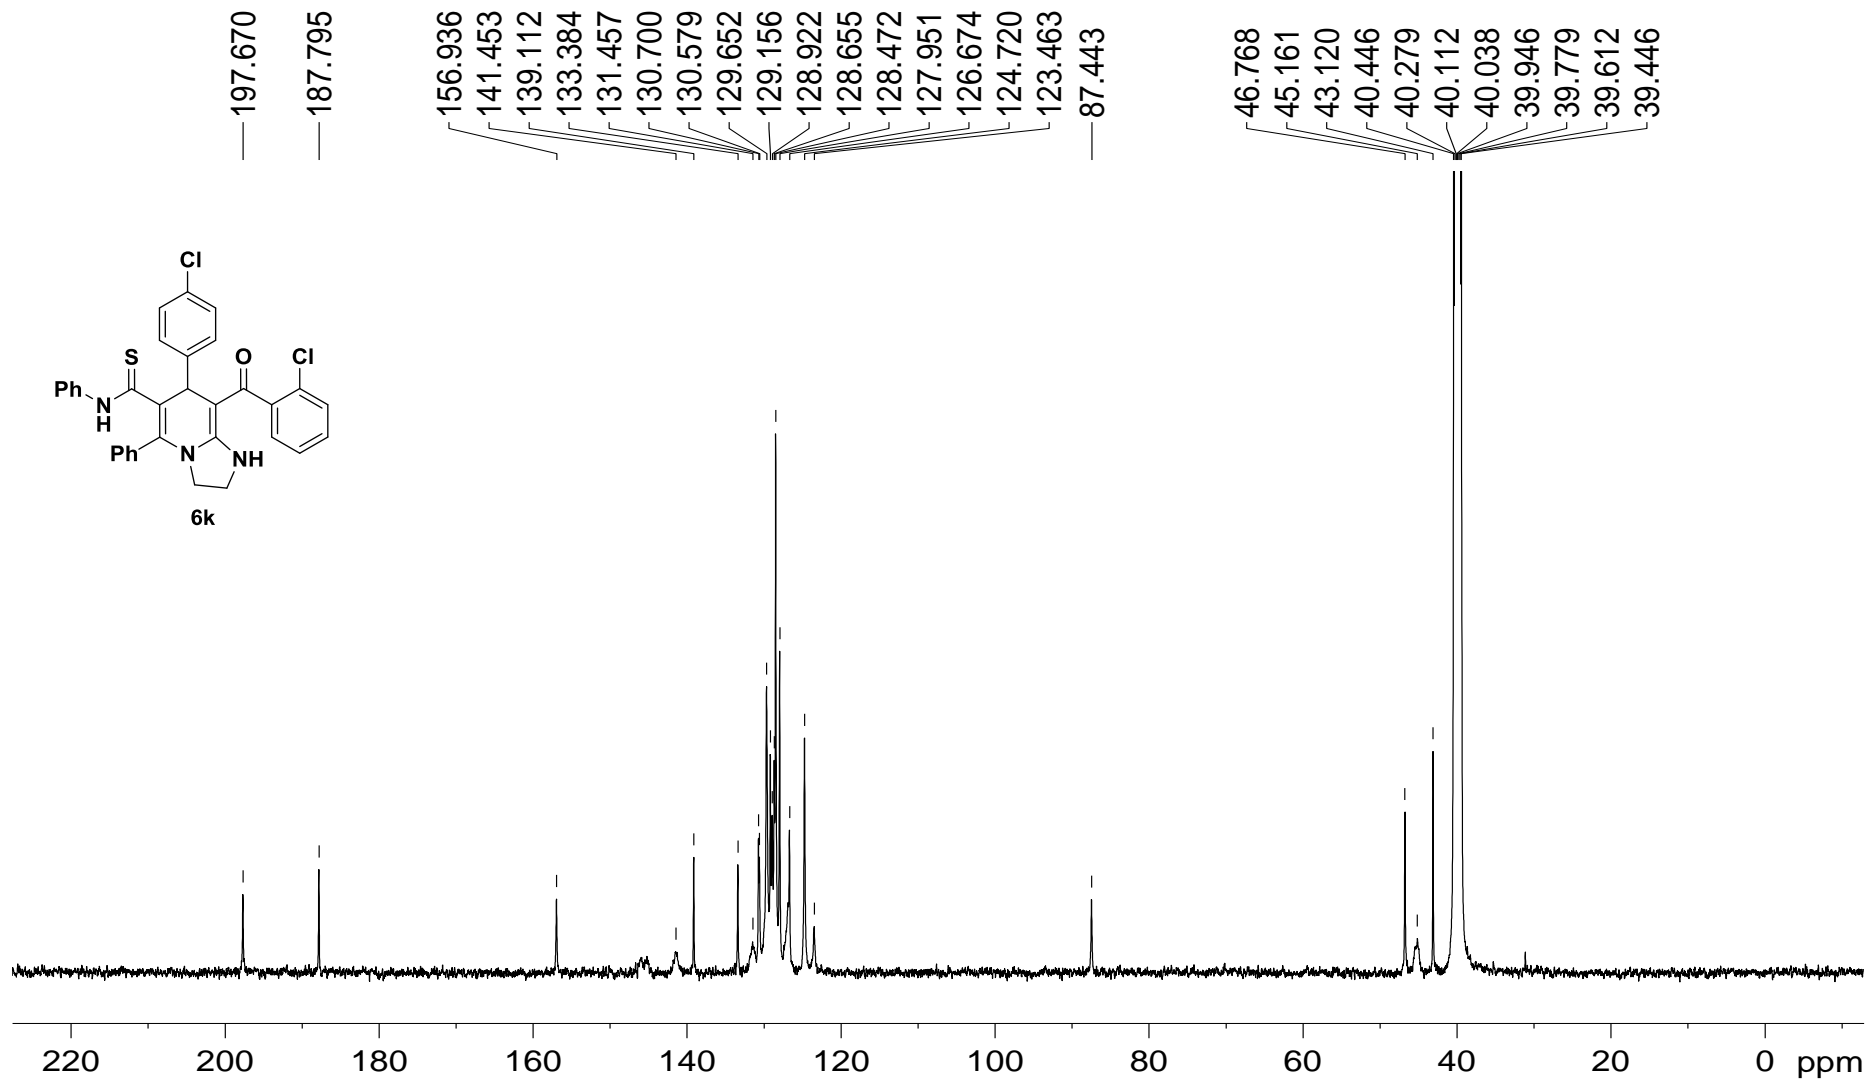

ZKL-S-1 1H 1D 2014 04 29

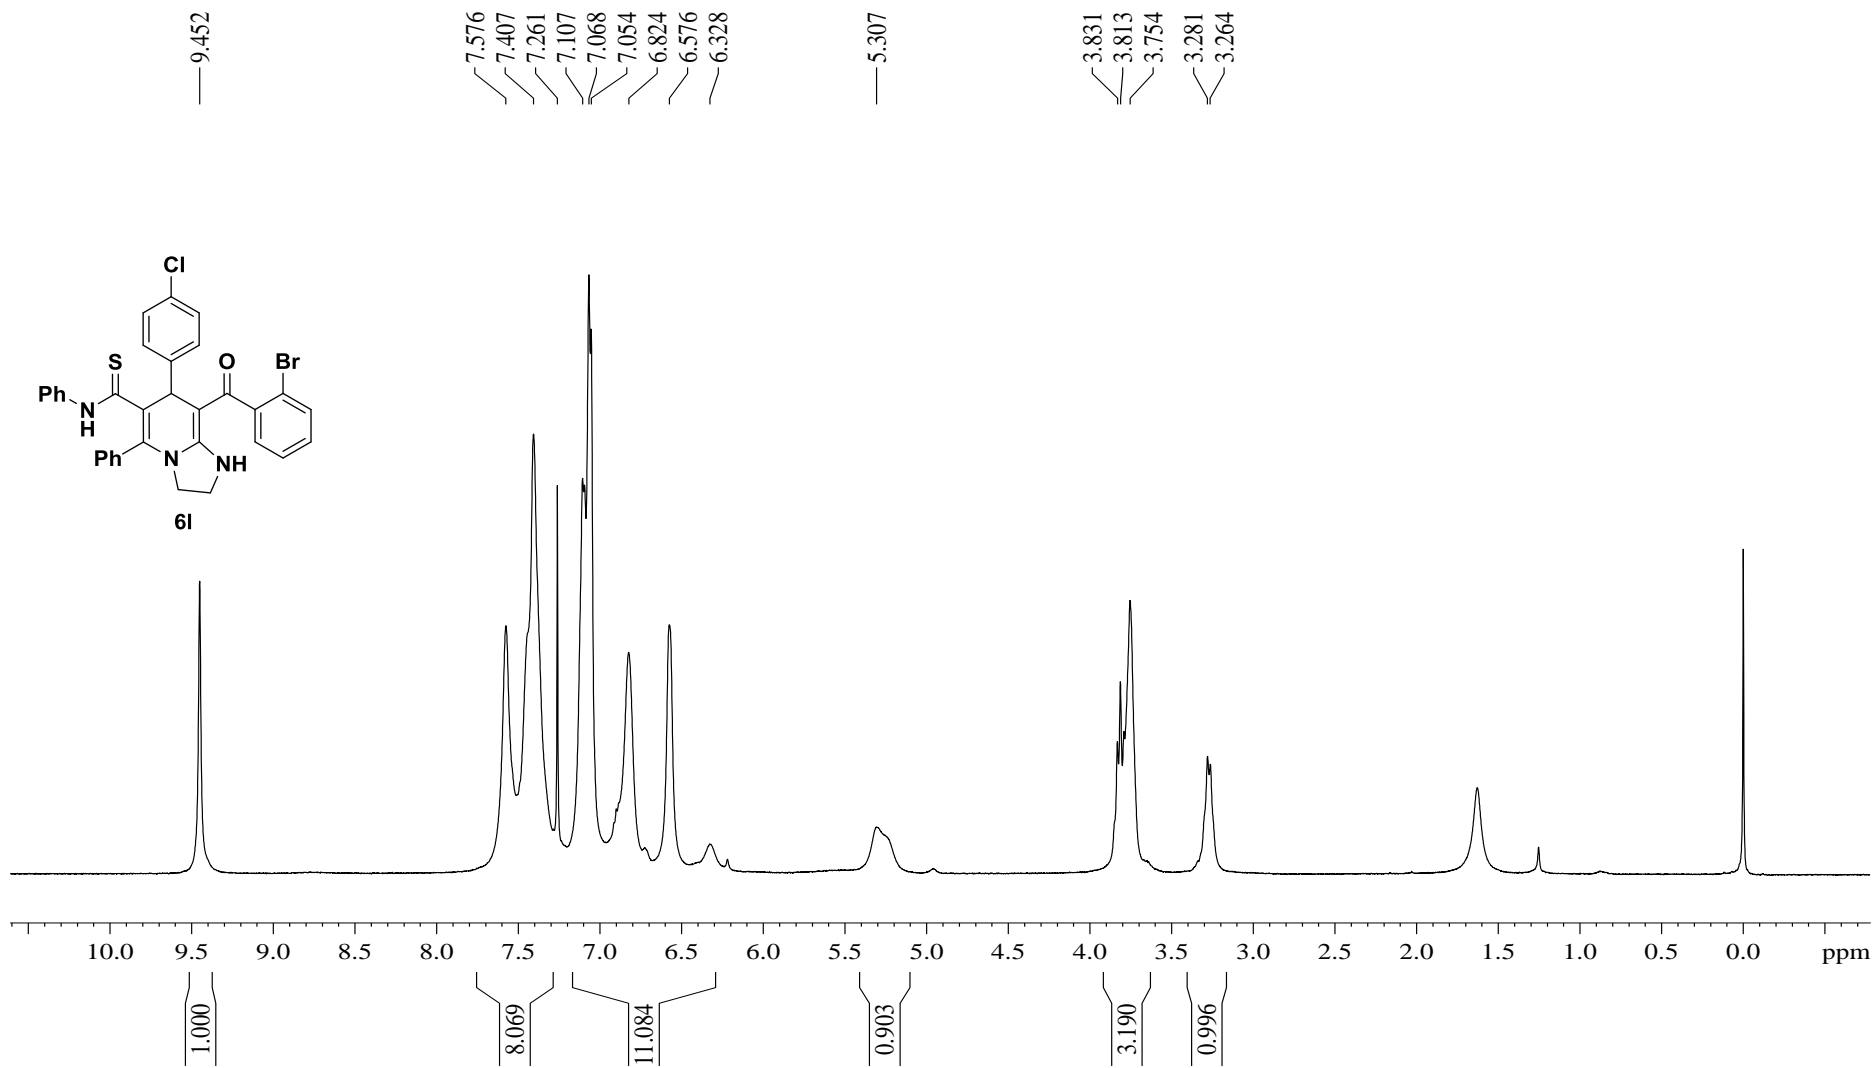



KL-s-1 13C 1D 2014 05 0

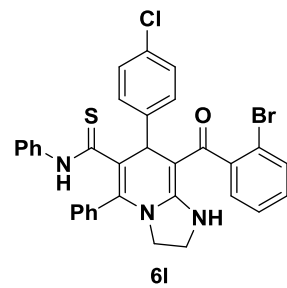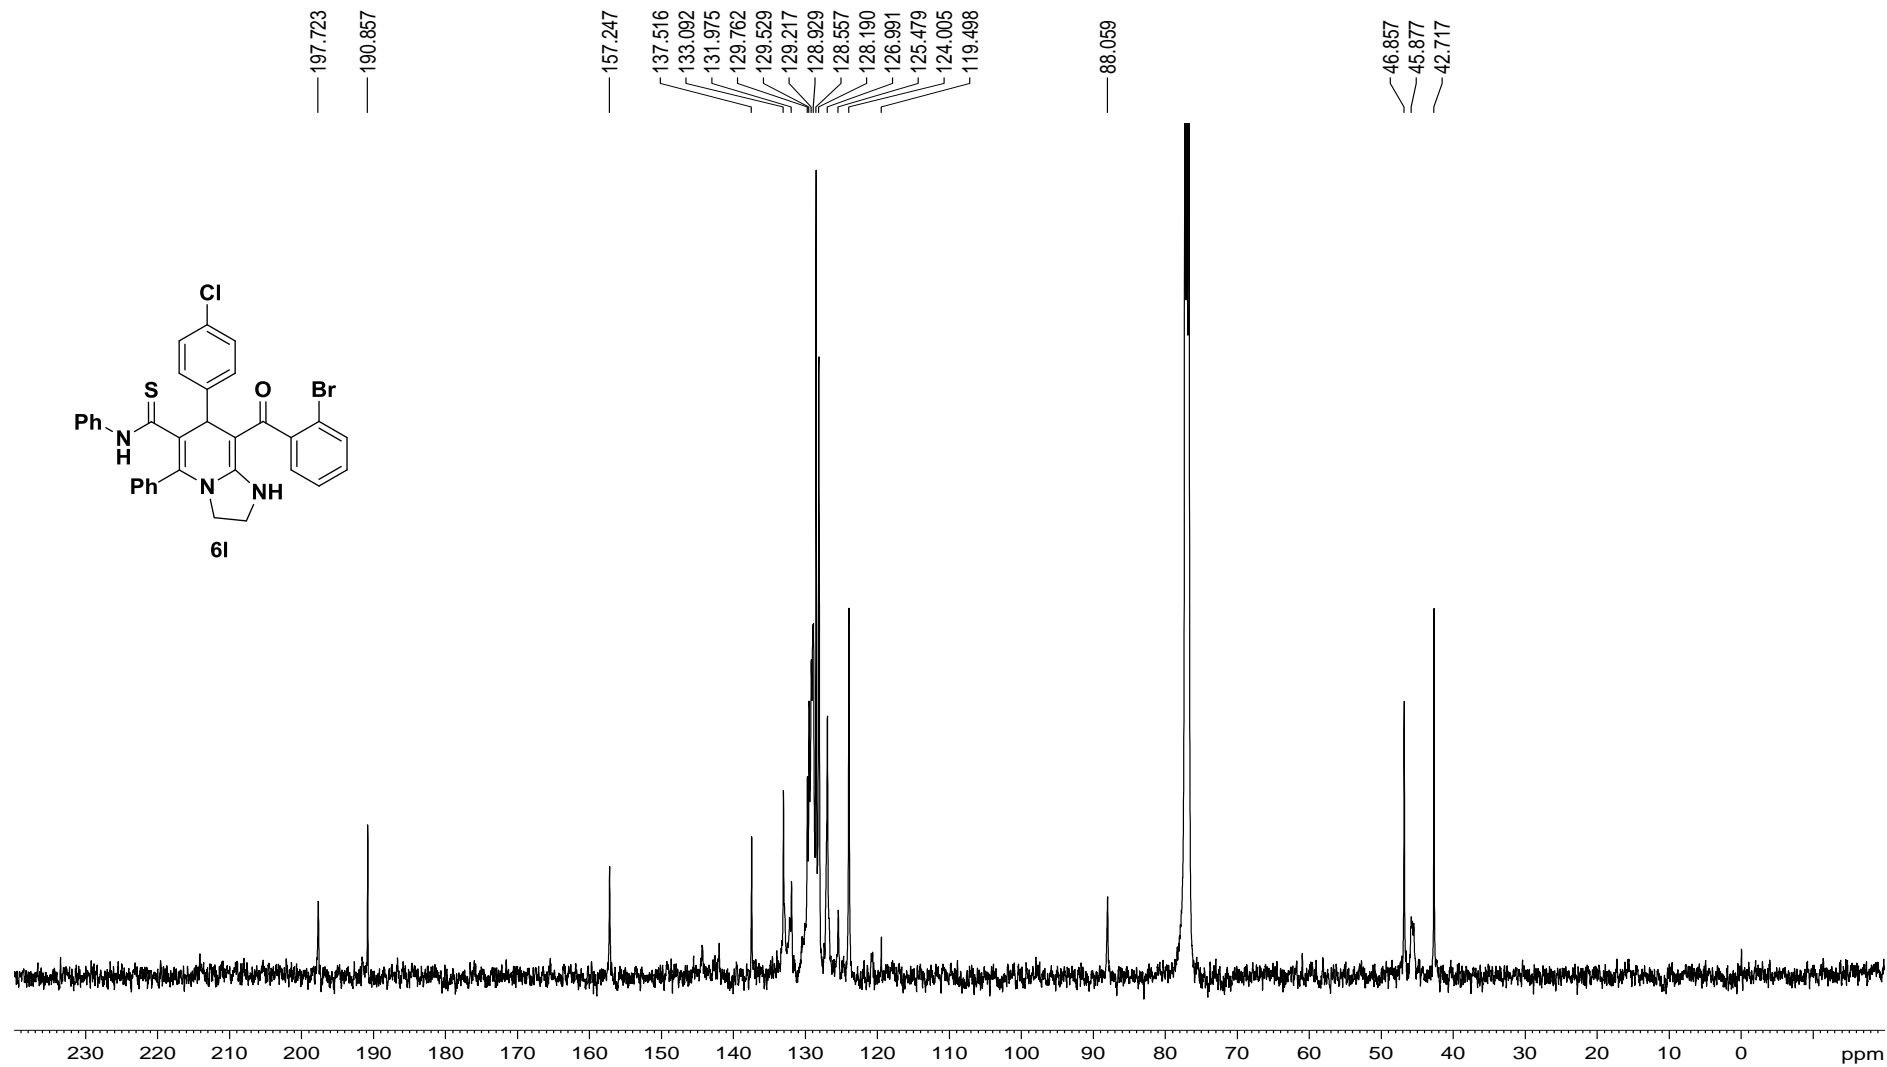

SP-P-5

1H 1D 2013 01 09

10.231

9.293

7.541

7.415

7.345

7.335

7.142

7.116

7.101

7.052

7.039

6.789

6.633

6.231

5.117

5.050

3.684

3.668

3.113

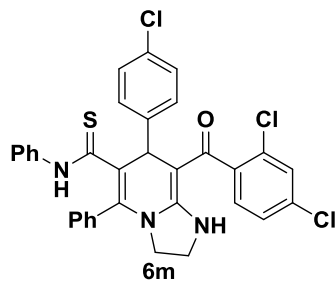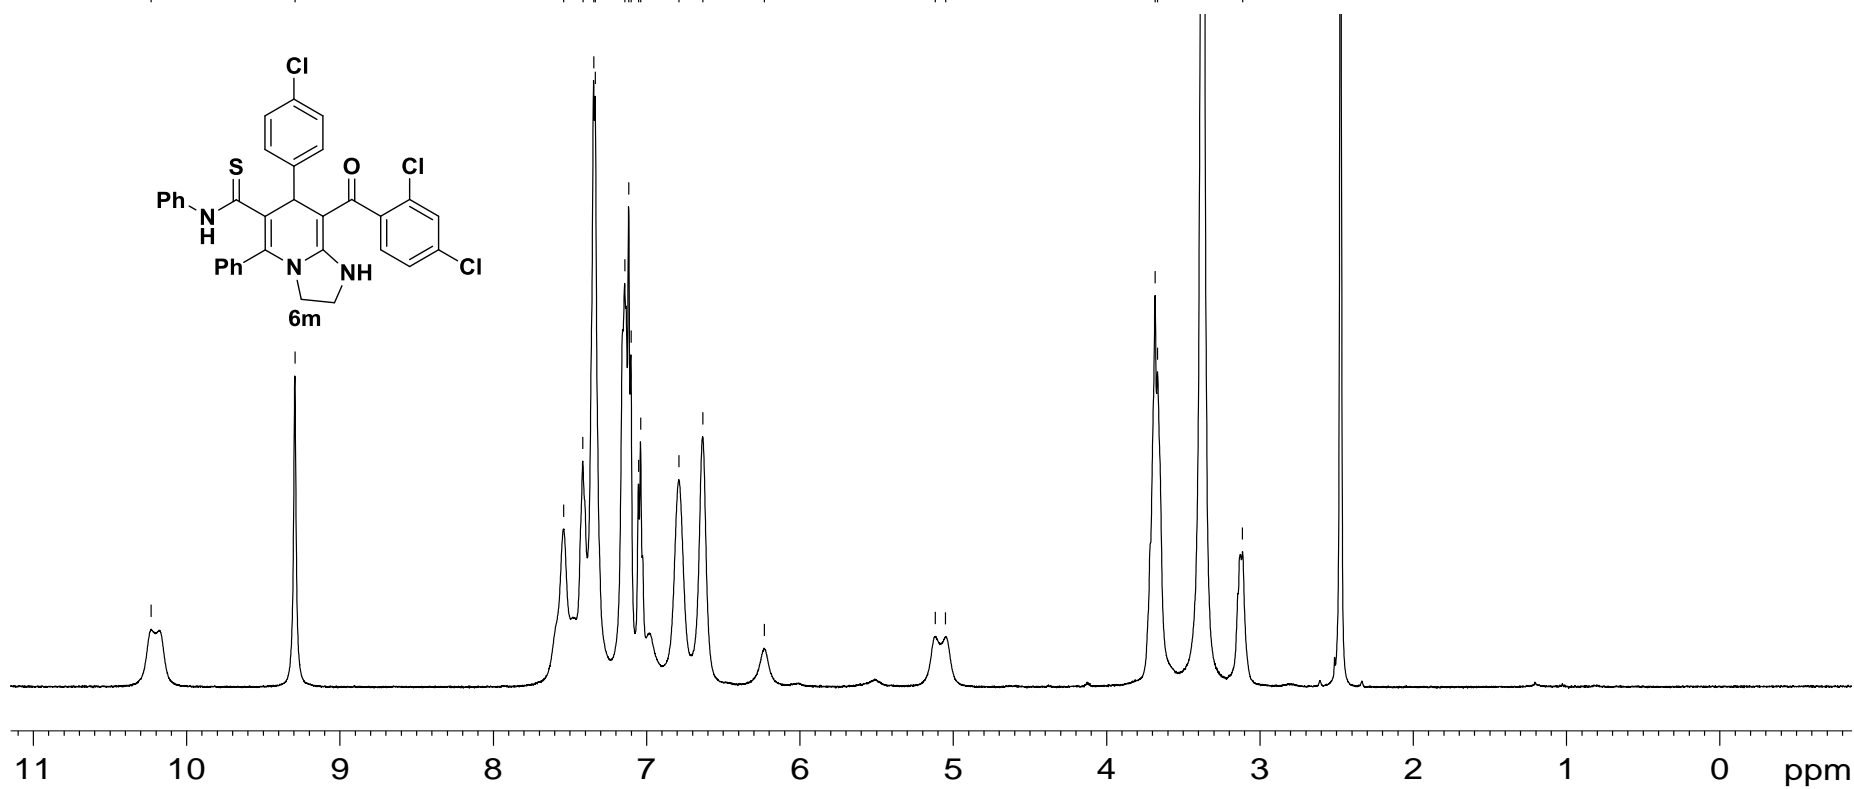

0.941

1.005

16.917

0.991

3.130

1.059

SP-P-5 13C 1D 2013 01 10

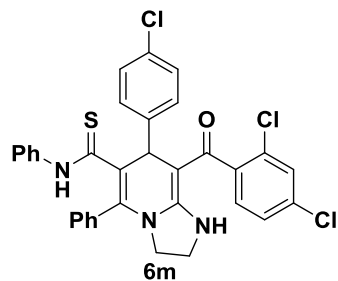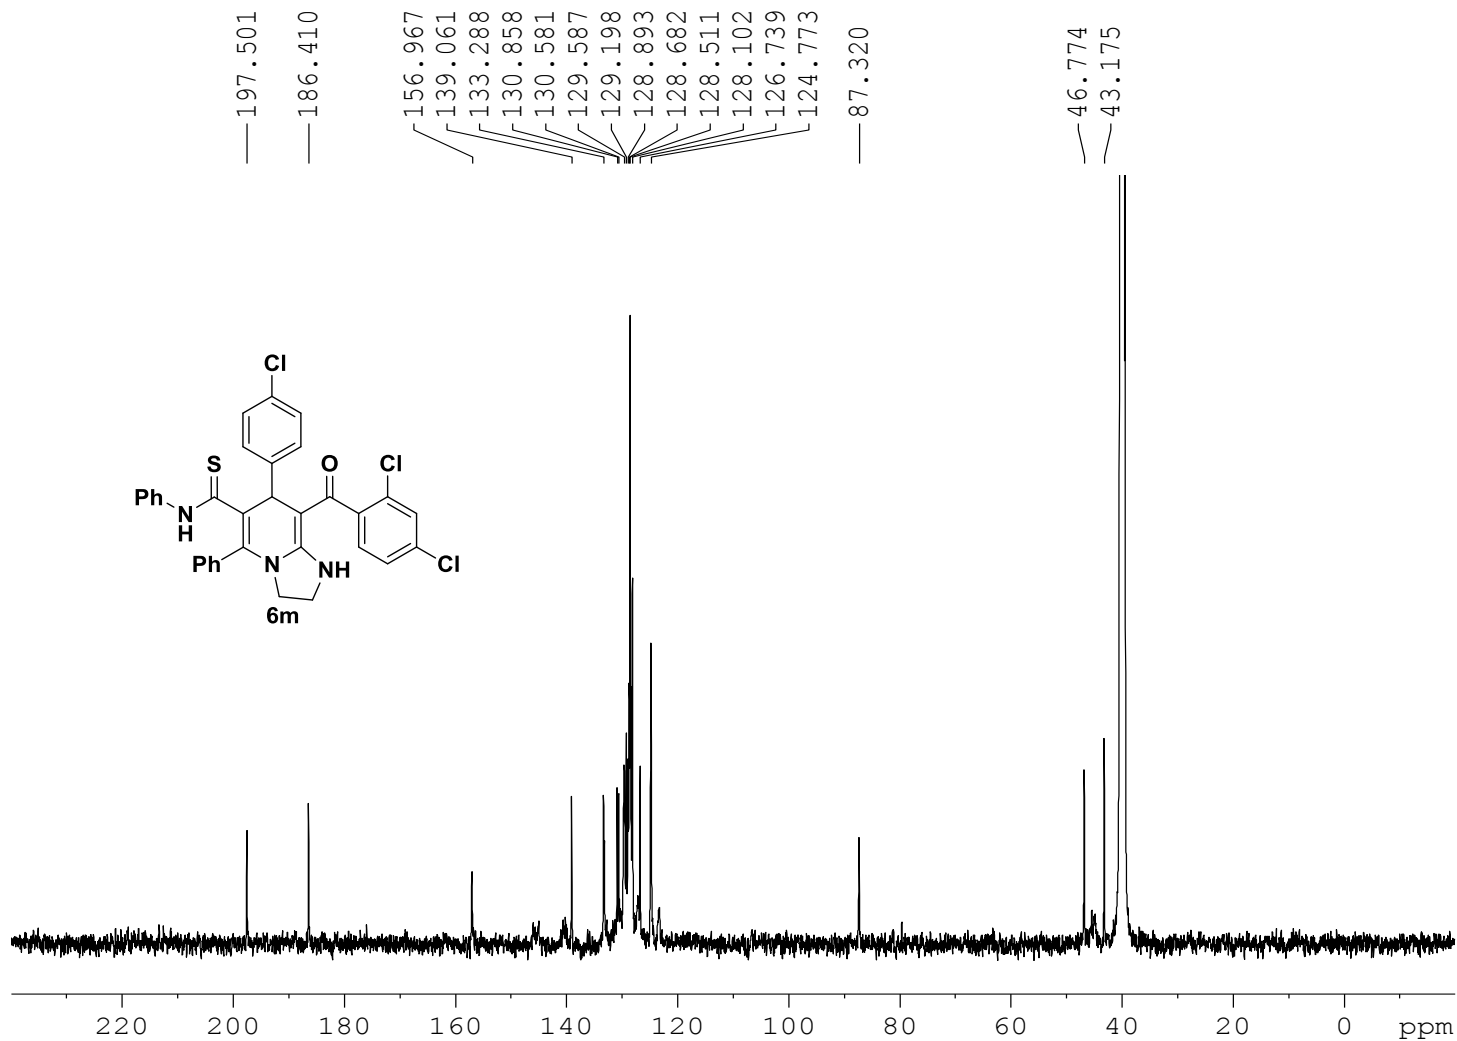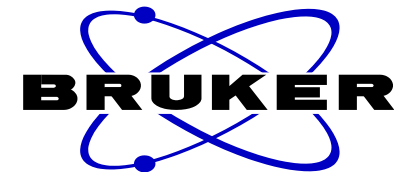

NAME SP-P-5  
EXPNO 2  
PROCNO 1  
Date\_ 20130110  
Time\_ 15.37  
INSTRUM spect  
PROBHD 5 mm PABBO BB-  
PULPROG zgpg30  
TD 65536  
SOLVENT DMSO  
NS 1968  
DS 2  
SWH 32679.738 Hz  
FIDRES 0.498653 Hz  
AQ 1.0027661 sec  
RG 5790  
DW 15.300 usec  
DE 6.00 usec  
TE 673.2 K  
D1 2.00000000 sec  
d11 0.03000000 sec  
DELTA 1.89999998 sec  
TD0 10

===== CHANNEL f1 =====  
NUC1 13C  
P1 12.20 usec  
PL1 3.00 dB  
SFO1 125.7464750 MHz

===== CHANNEL f2 =====  
CPDPRG2 waltz16  
NUC2 1H  
PCPD2 80.00 usec  
PL2 2.00 dB  
PL12 17.70 dB  
PL13 17.70 dB  
SFO2 500.0355000 MHz  
SI 32768  
SF 125.7326455 MHz  
WDW EM  
SSB 0  
LB 5.00 Hz  
GB 0  
PC 2.00

ZKL-S-6 1H 1D 2014 06 09

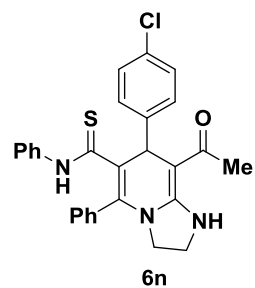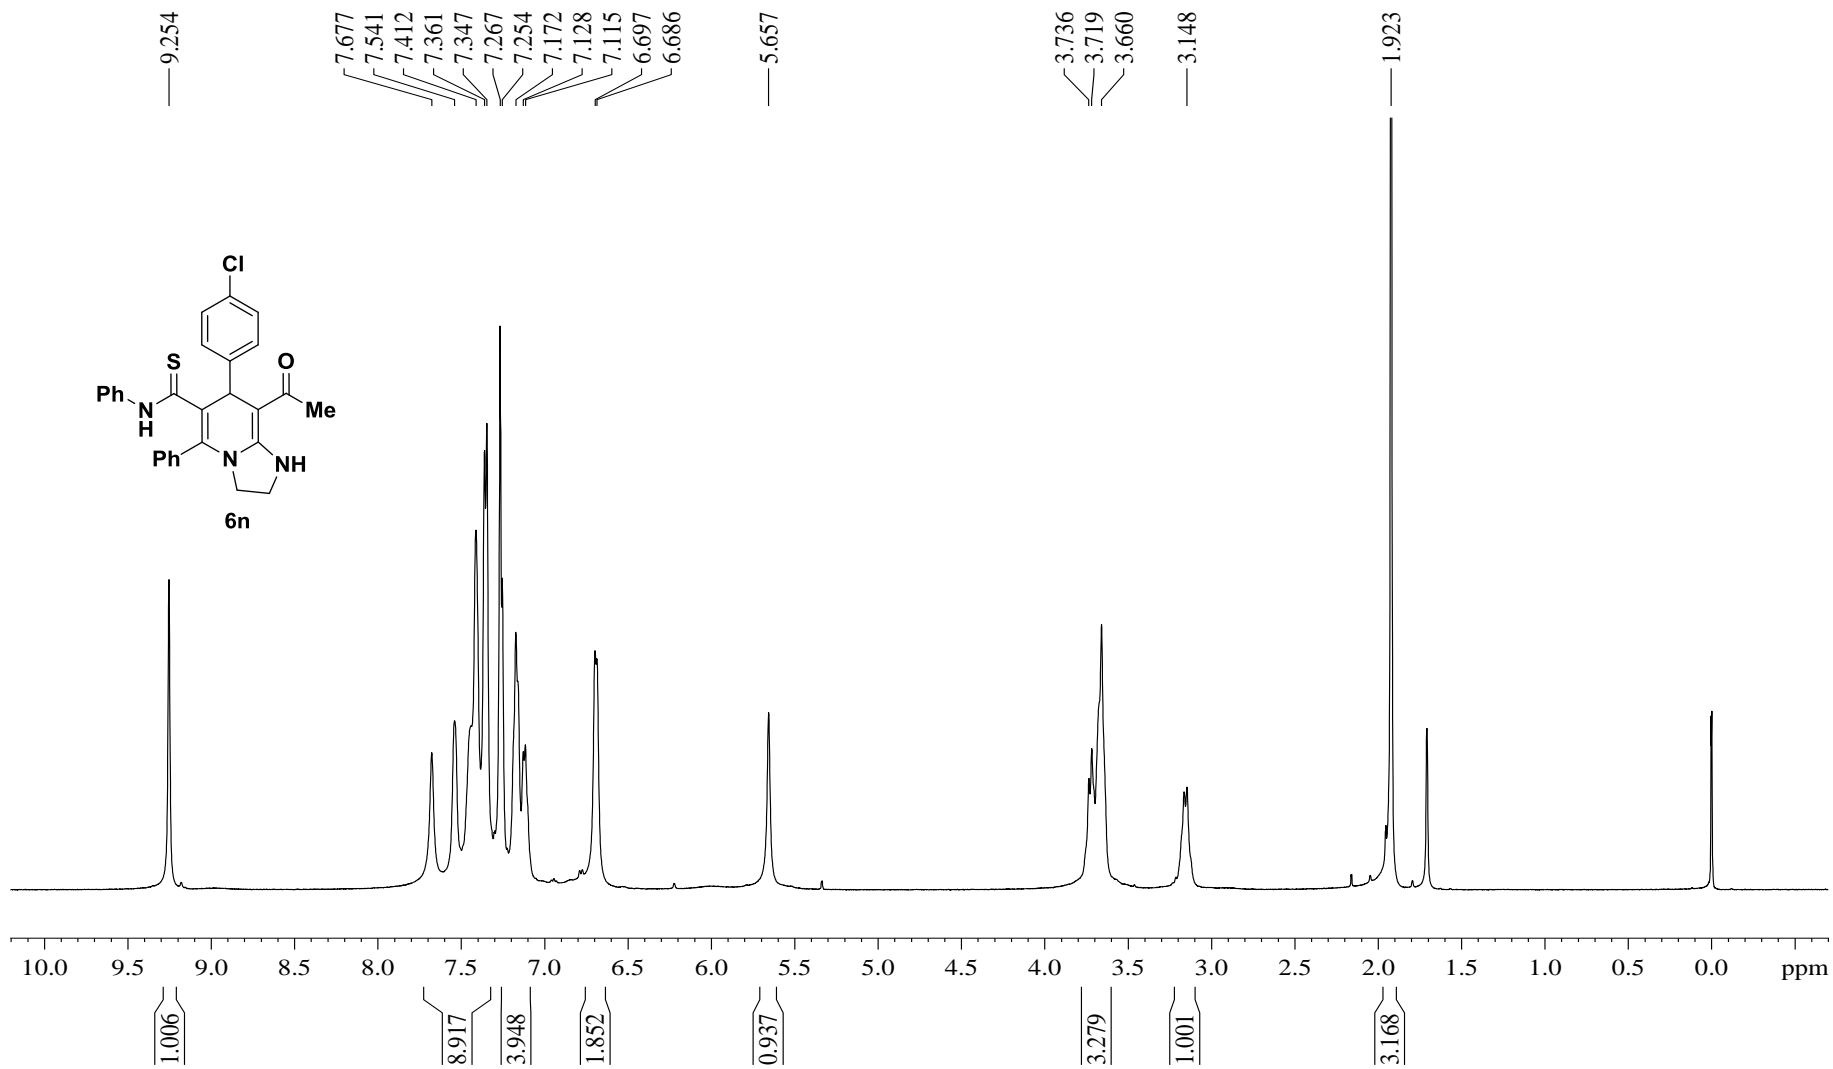

L-S-6 13C 1D 2014 06

198.299  
194.354

155.779  
144.785  
137.641  
133.417  
132.330  
131.355  
129.778  
129.438  
128.704  
128.585  
128.029  
127.042  
124.542  
124.070

87.426

77.251  
76.998  
76.744

46.795  
45.756  
42.490

26.709

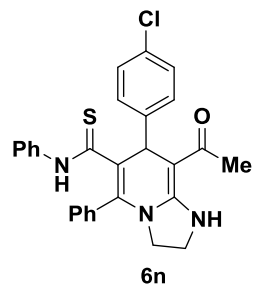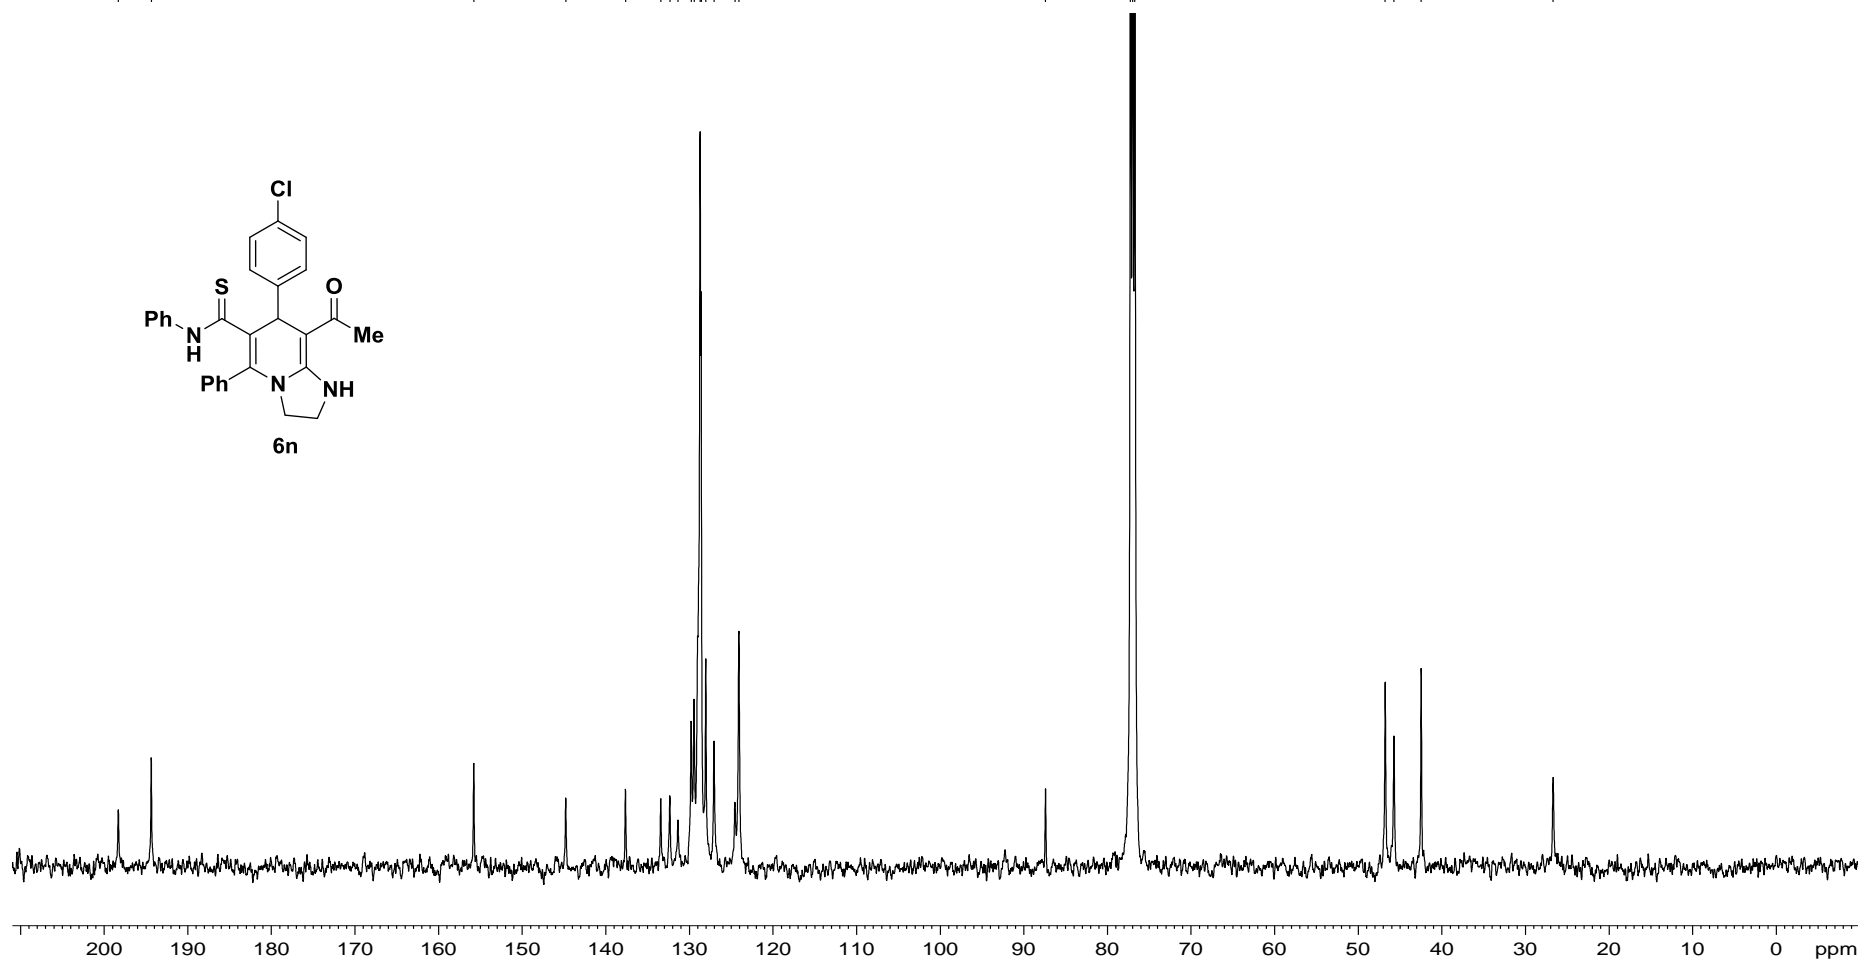

ZKL-S-7

1H 1D 2014 06 13

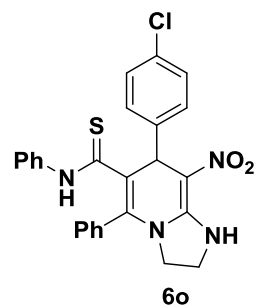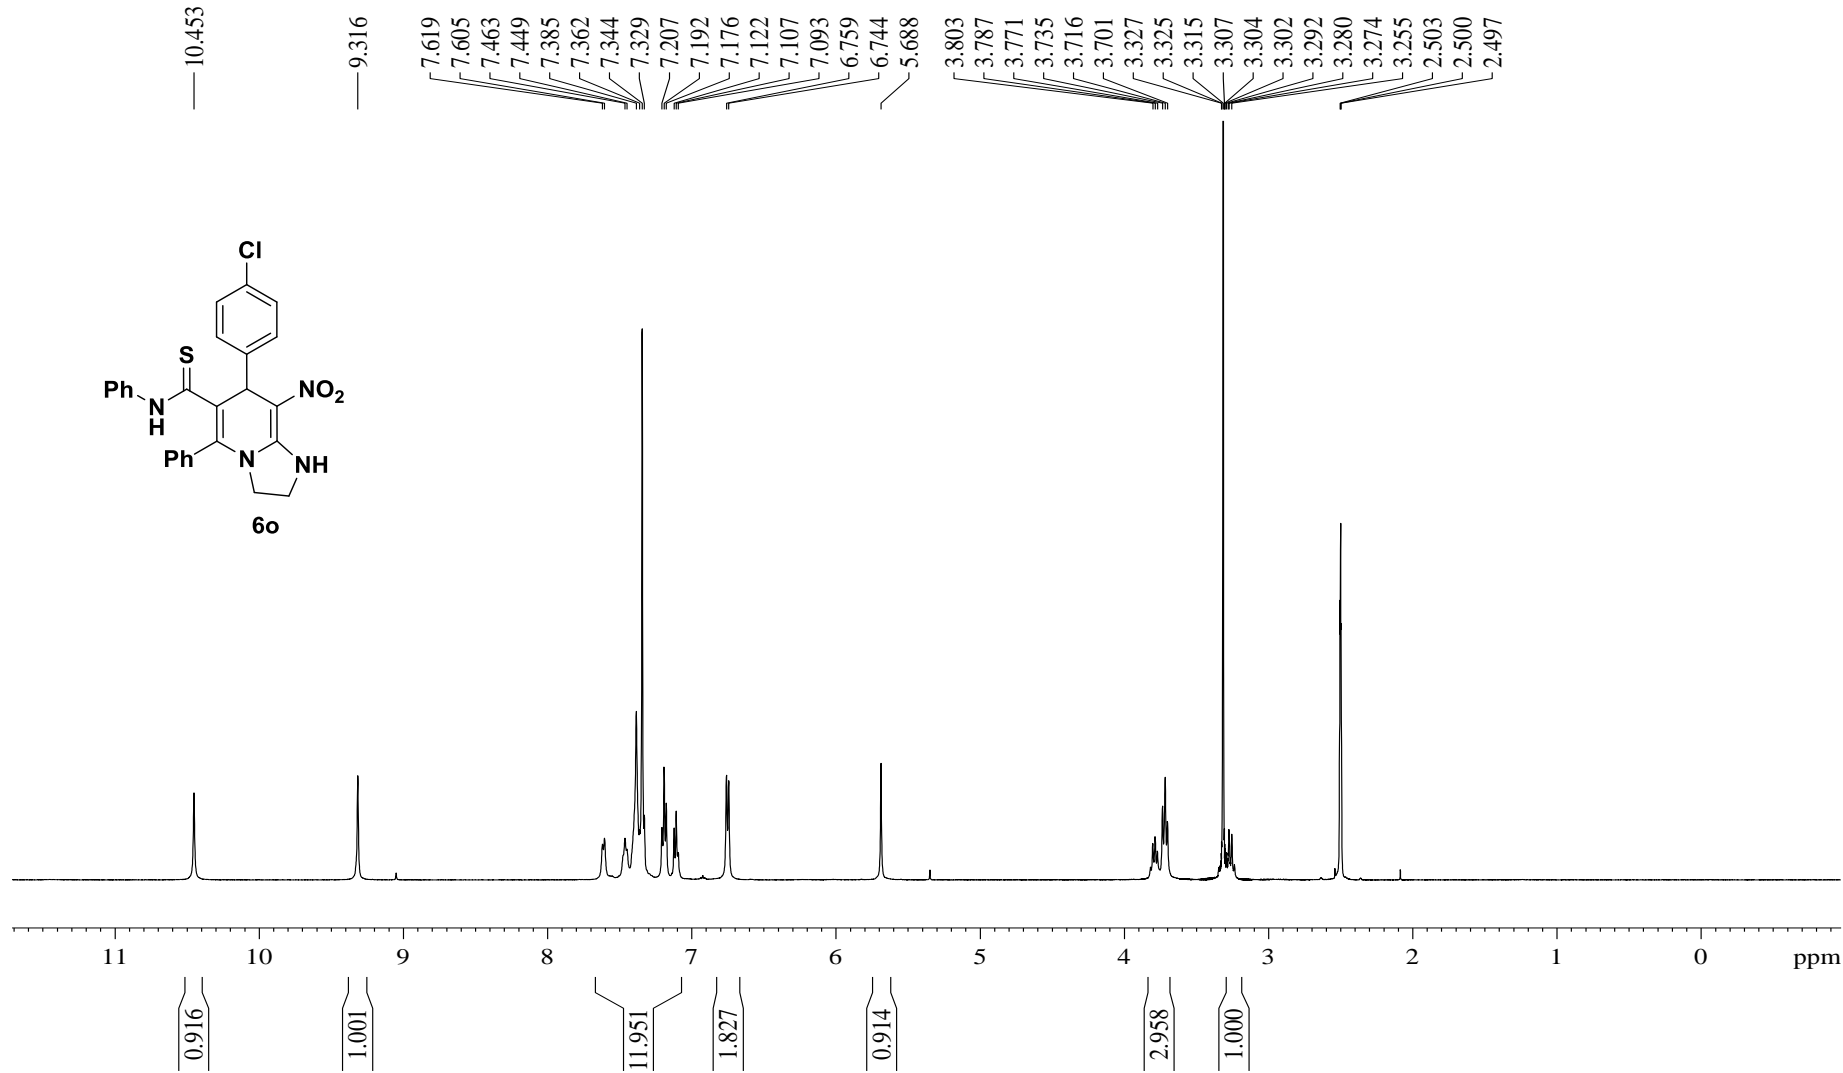

ZKL-S-7 13C 1D 2014 06 18

198.593

155.116  
144.189  
141.190  
134.997  
133.685  
132.817  
132.180  
131.673  
131.272  
130.835  
130.605  
129.694  
129.095  
126.922  
124.847  
108.100

49.933  
47.596  
45.748

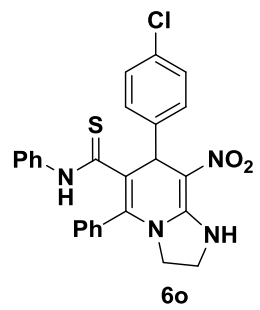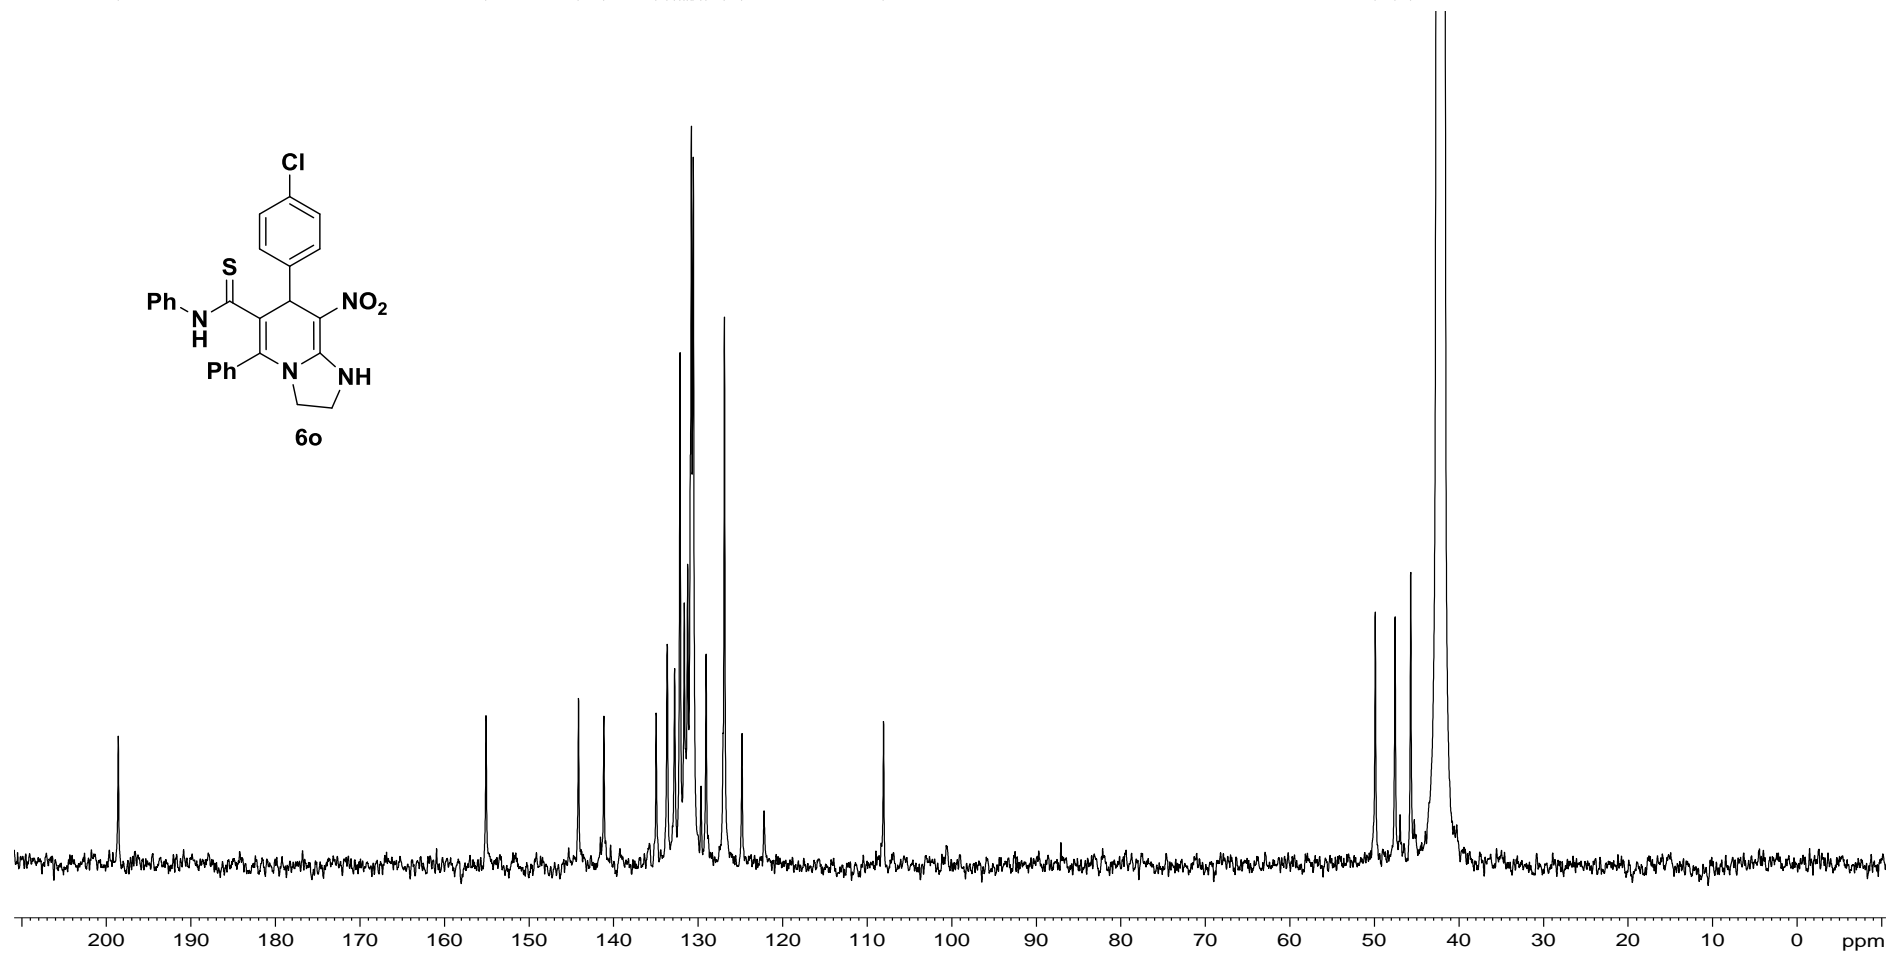

ZKL-S-8a 1H 1D 2014 06 09

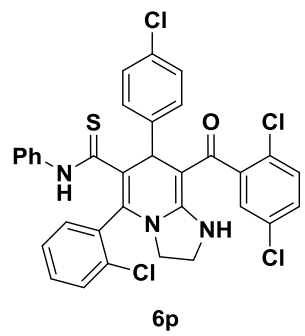

9.407  
7.852  
7.570  
7.556  
7.487  
7.473  
7.398  
7.383  
7.367  
7.353  
7.339  
7.313  
7.166  
7.087  
7.072  
6.865  
6.848  
6.670  
6.656  
6.209  
5.083  
3.893  
3.874  
3.856  
3.836  
3.824  
3.815  
3.804  
3.785  
3.664  
3.646  
3.635  
3.616  
3.359  
3.341  
3.322  
3.304

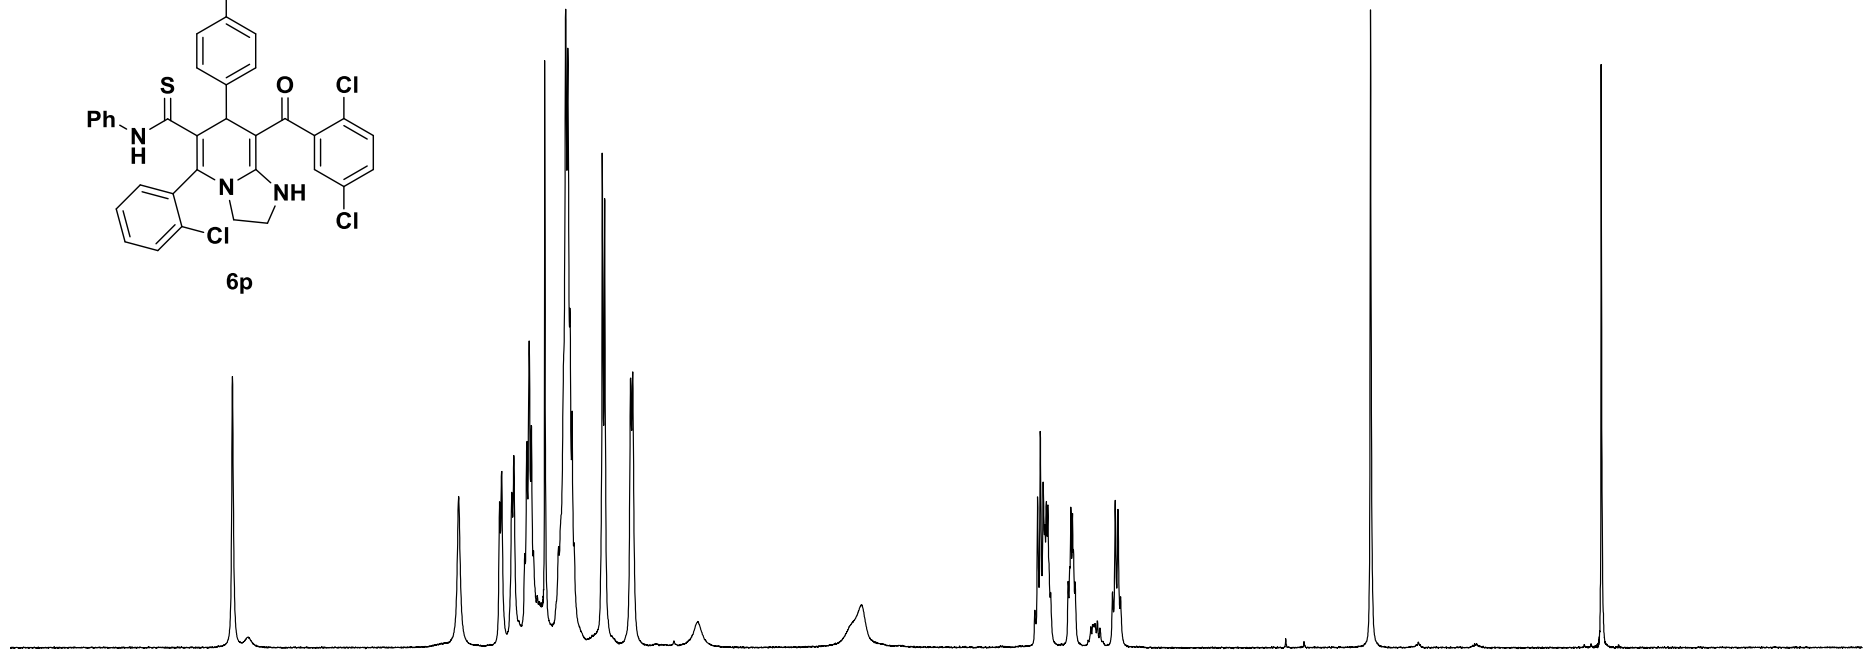

10 9 8 7 6 5 4 3 2 1 0 -1 ppm

0.849  
16.712  
0.869  
2.000  
0.885  
0.863



KL-S-8a 13C 1D 2014 06 1

197.041

188.326

156.875  
144.939  
141.908  
137.550  
133.382  
132.434  
132.032  
131.440  
131.345  
130.516  
129.971  
128.977  
128.645  
128.290  
127.129  
125.803  
123.719

87.911

45.282  
44.145  
43.008

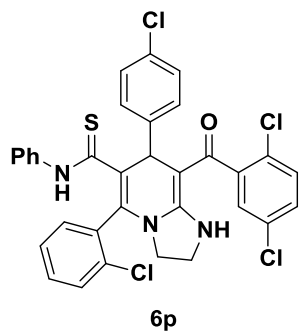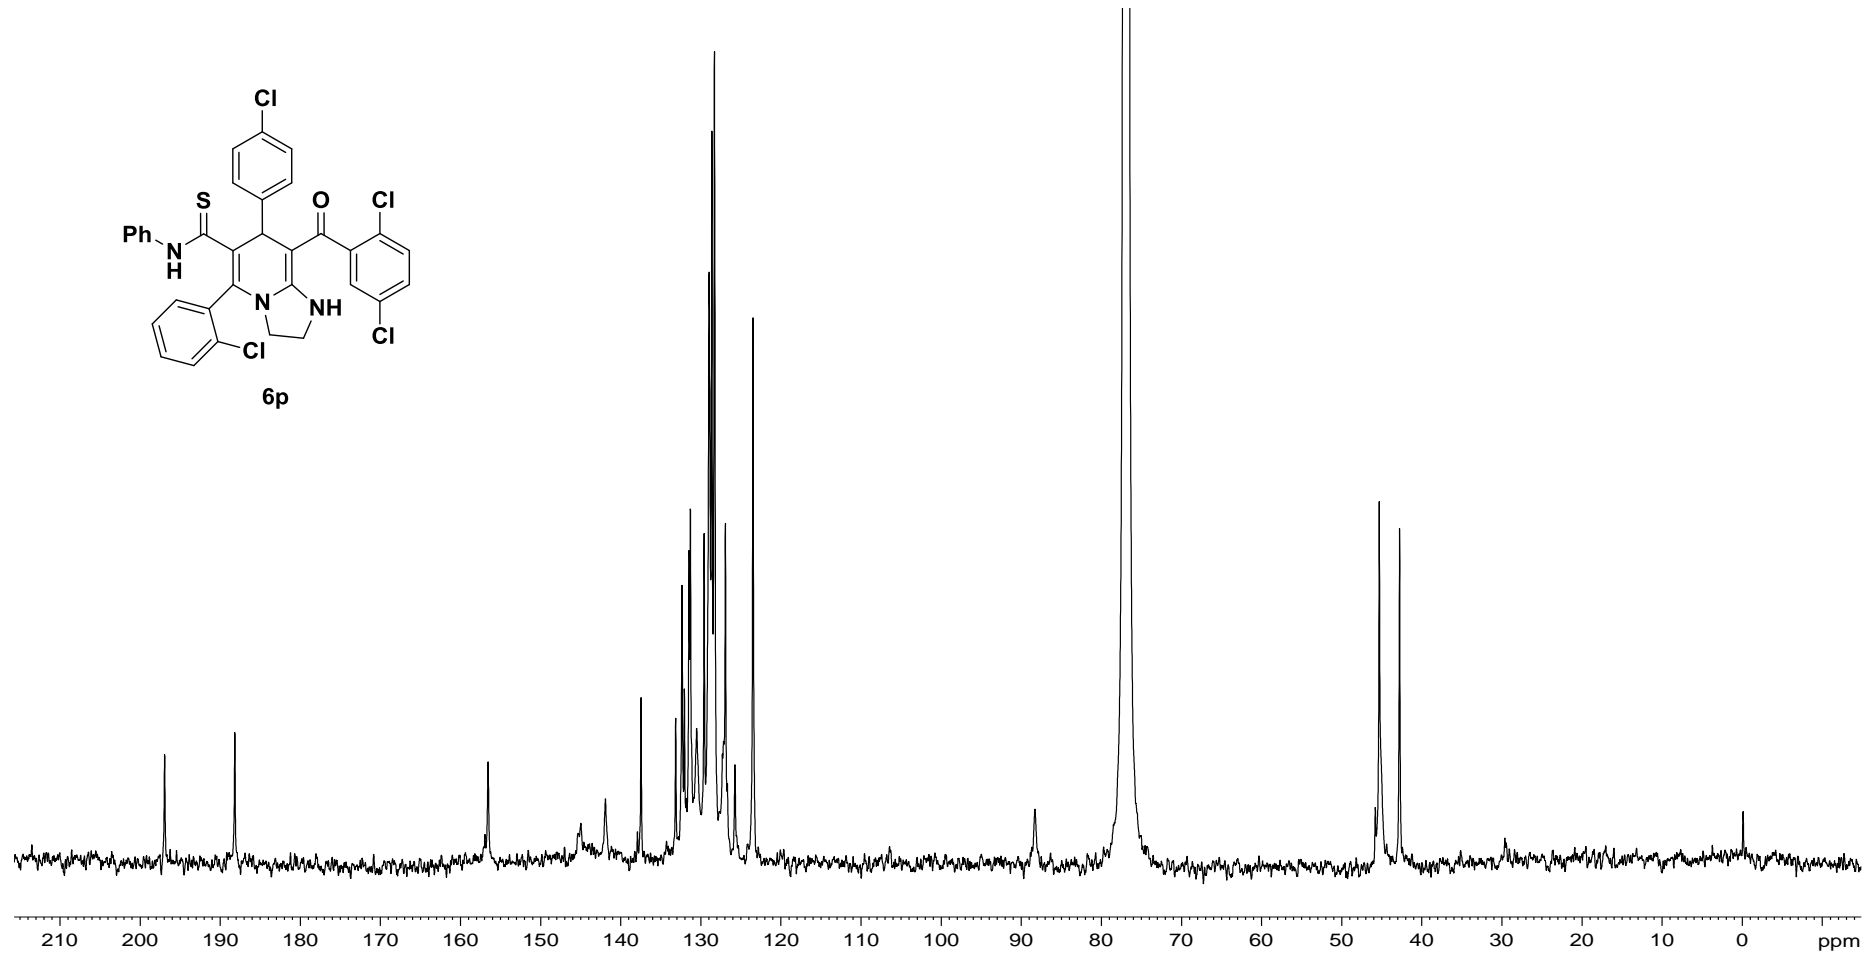

ZKL-S-5 1H 1D 2014 06 09

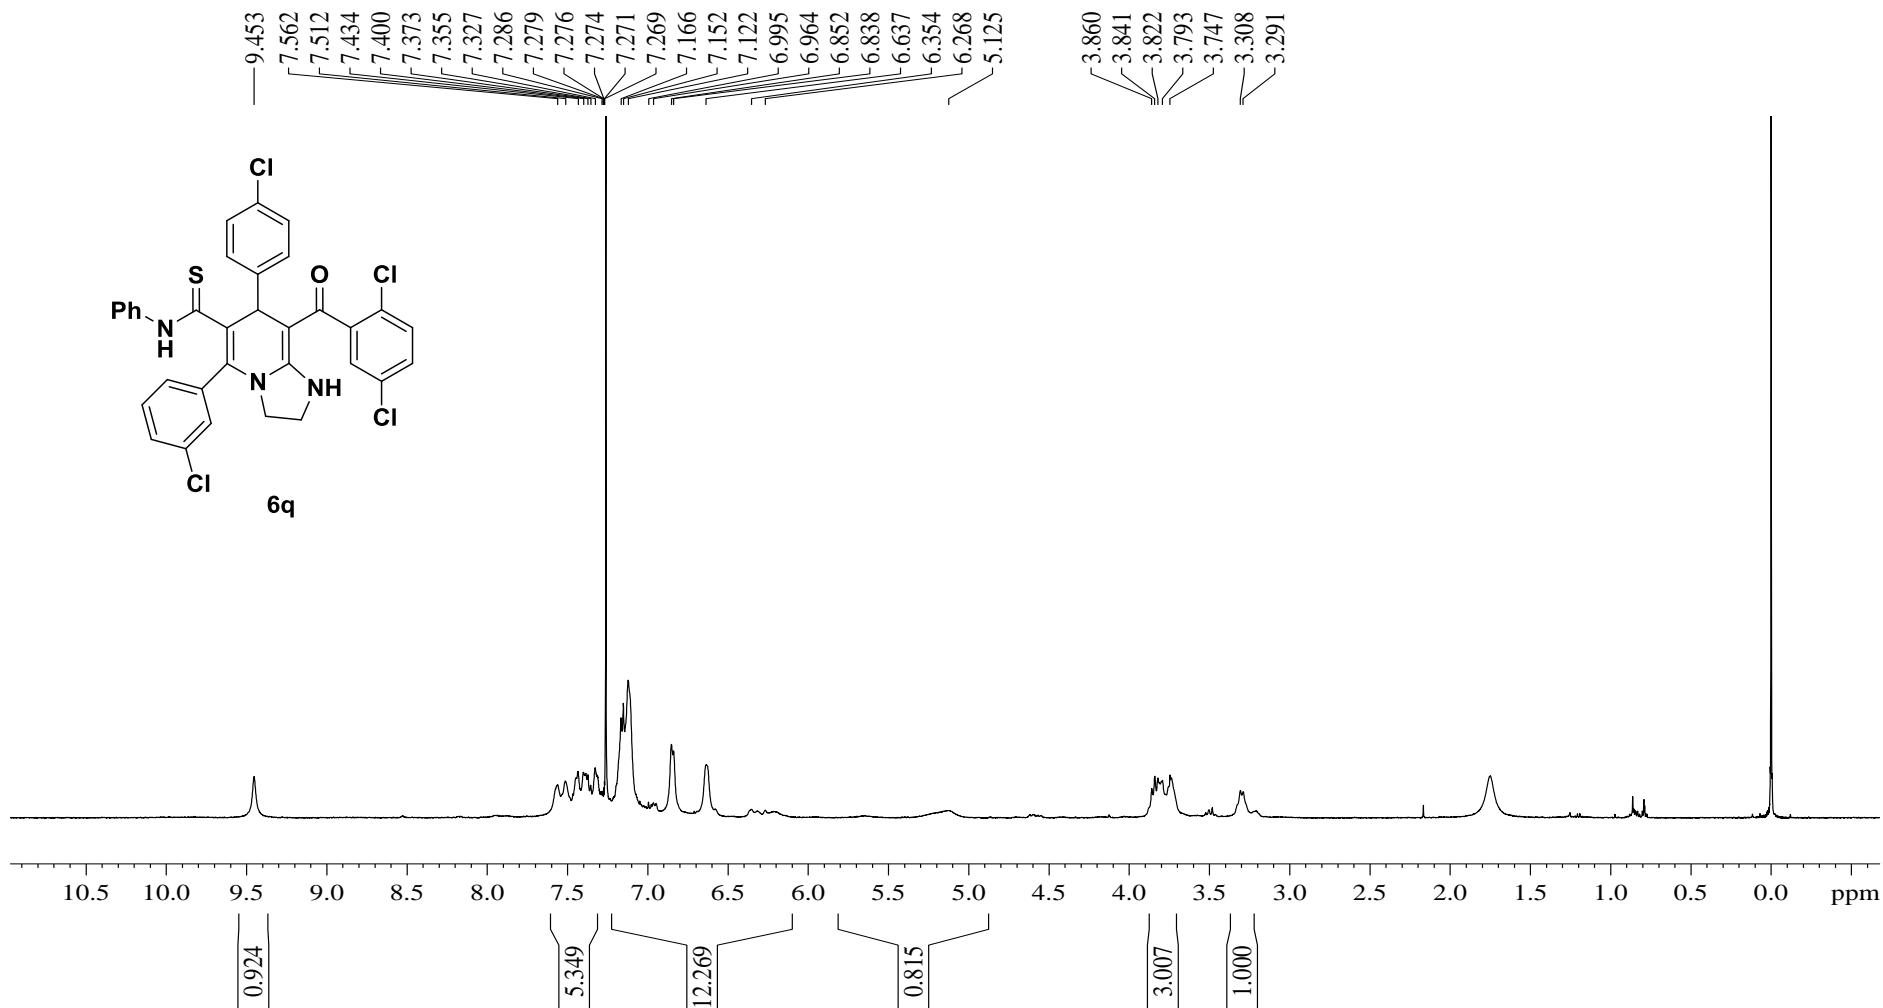

ZKL-S-5 13C 1D 2014 06 13

197.221

187.707

157.145

141.719

137.396

135.570

132.292

131.073

130.643

129.668

128.900

128.610

128.291

127.445

127.024

125.569

124.694

123.729

88.248

77.255

77.002

76.749

46.676

45.238

42.627

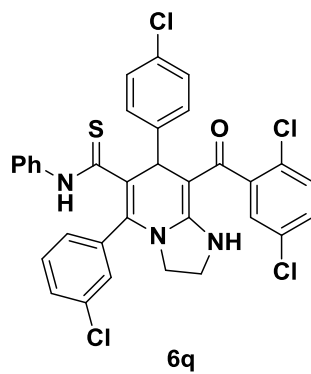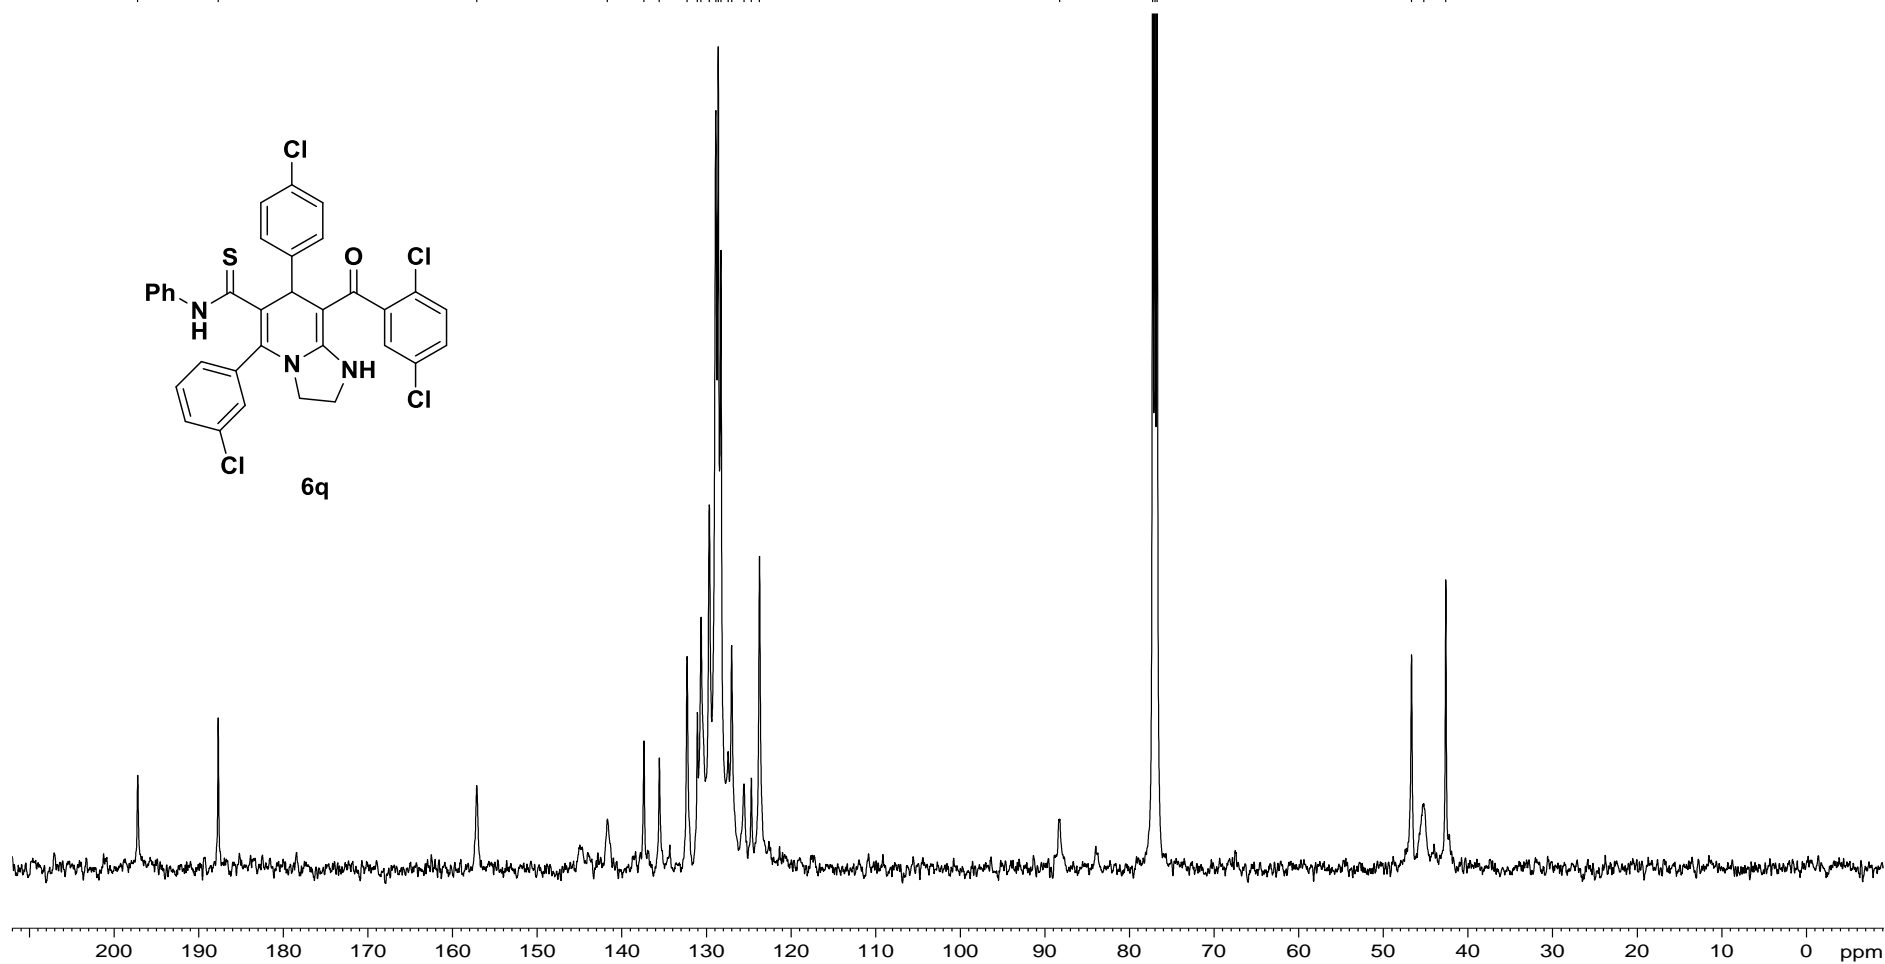

ZKL-S-4 1H 1D 2014 06 09

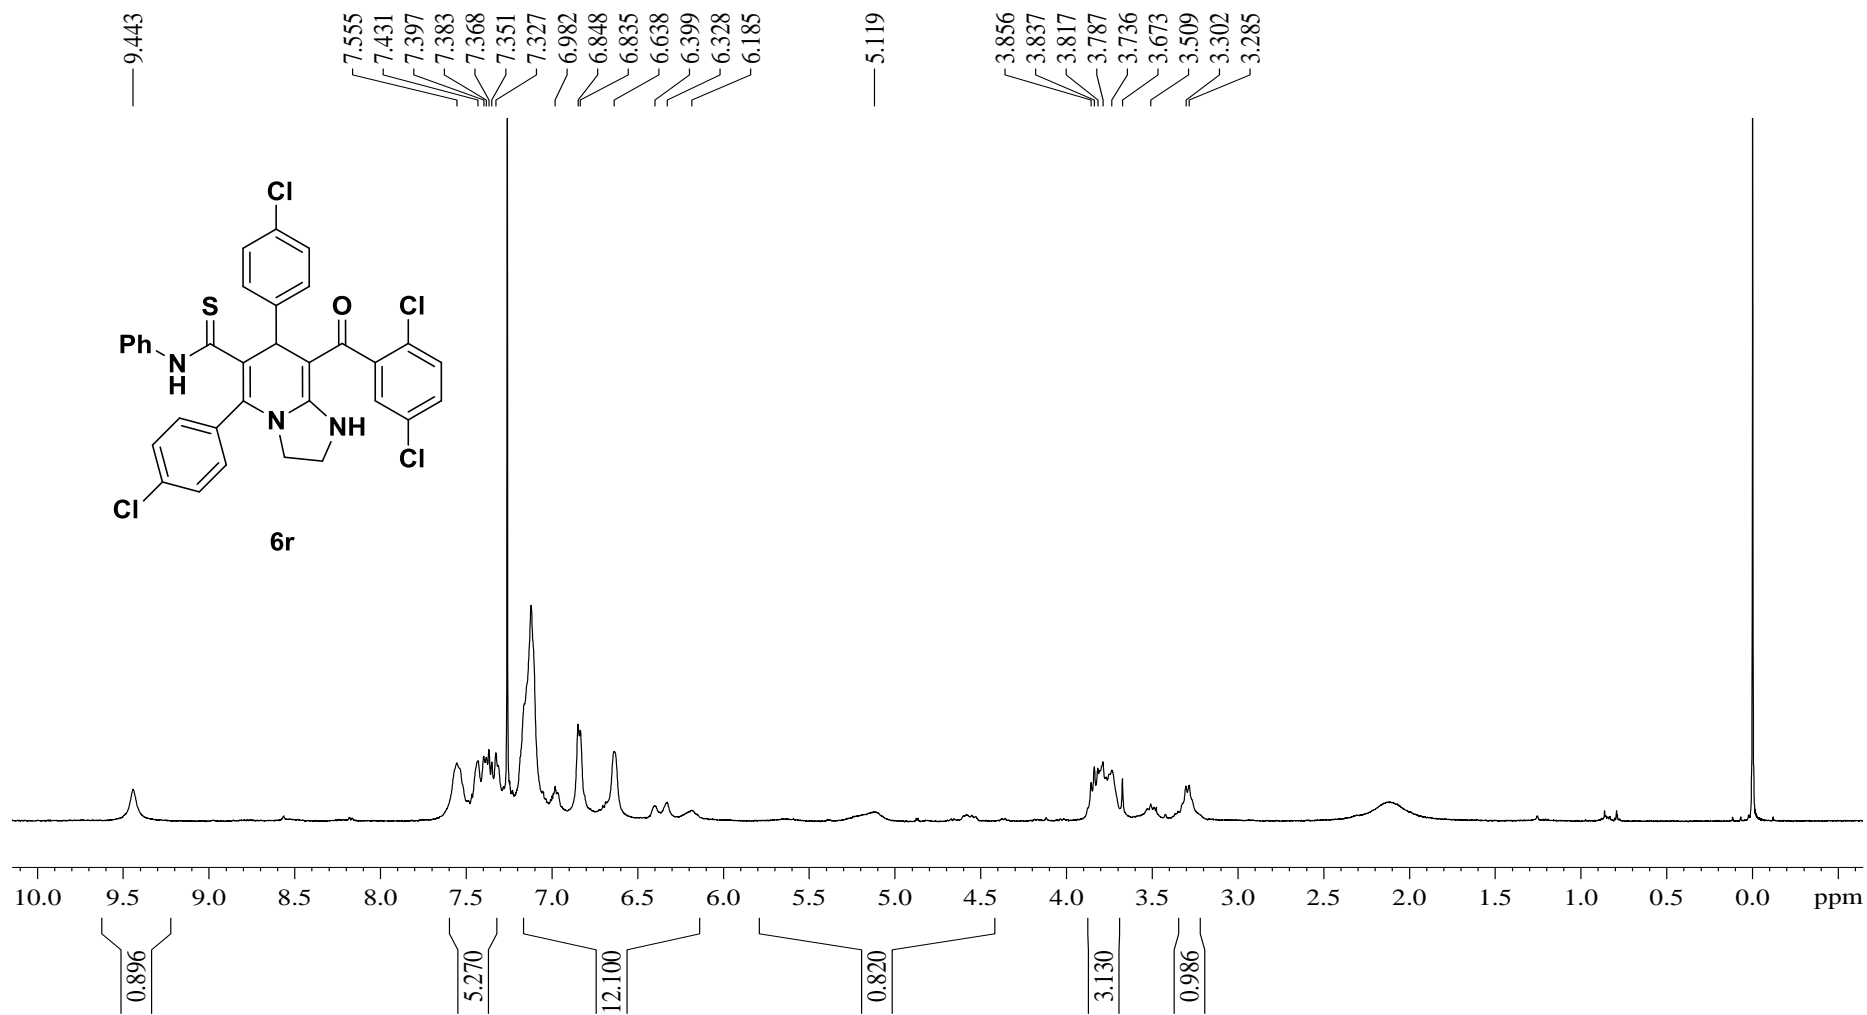

L-S-4 13C 1D 2014 06

197.374

188.194

157.174

137.345

135.700

132.660

132.381

131.176

130.765

130.104

129.884

129.752

129.487

129.061

128.738

128.415

127.167

125.815

123.818

122.657

88.171

46.810

42.697

45.356

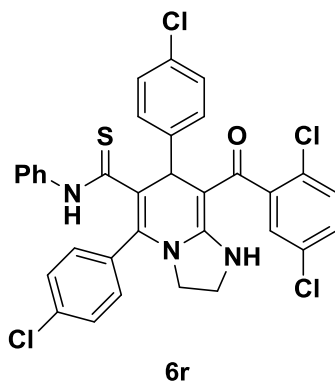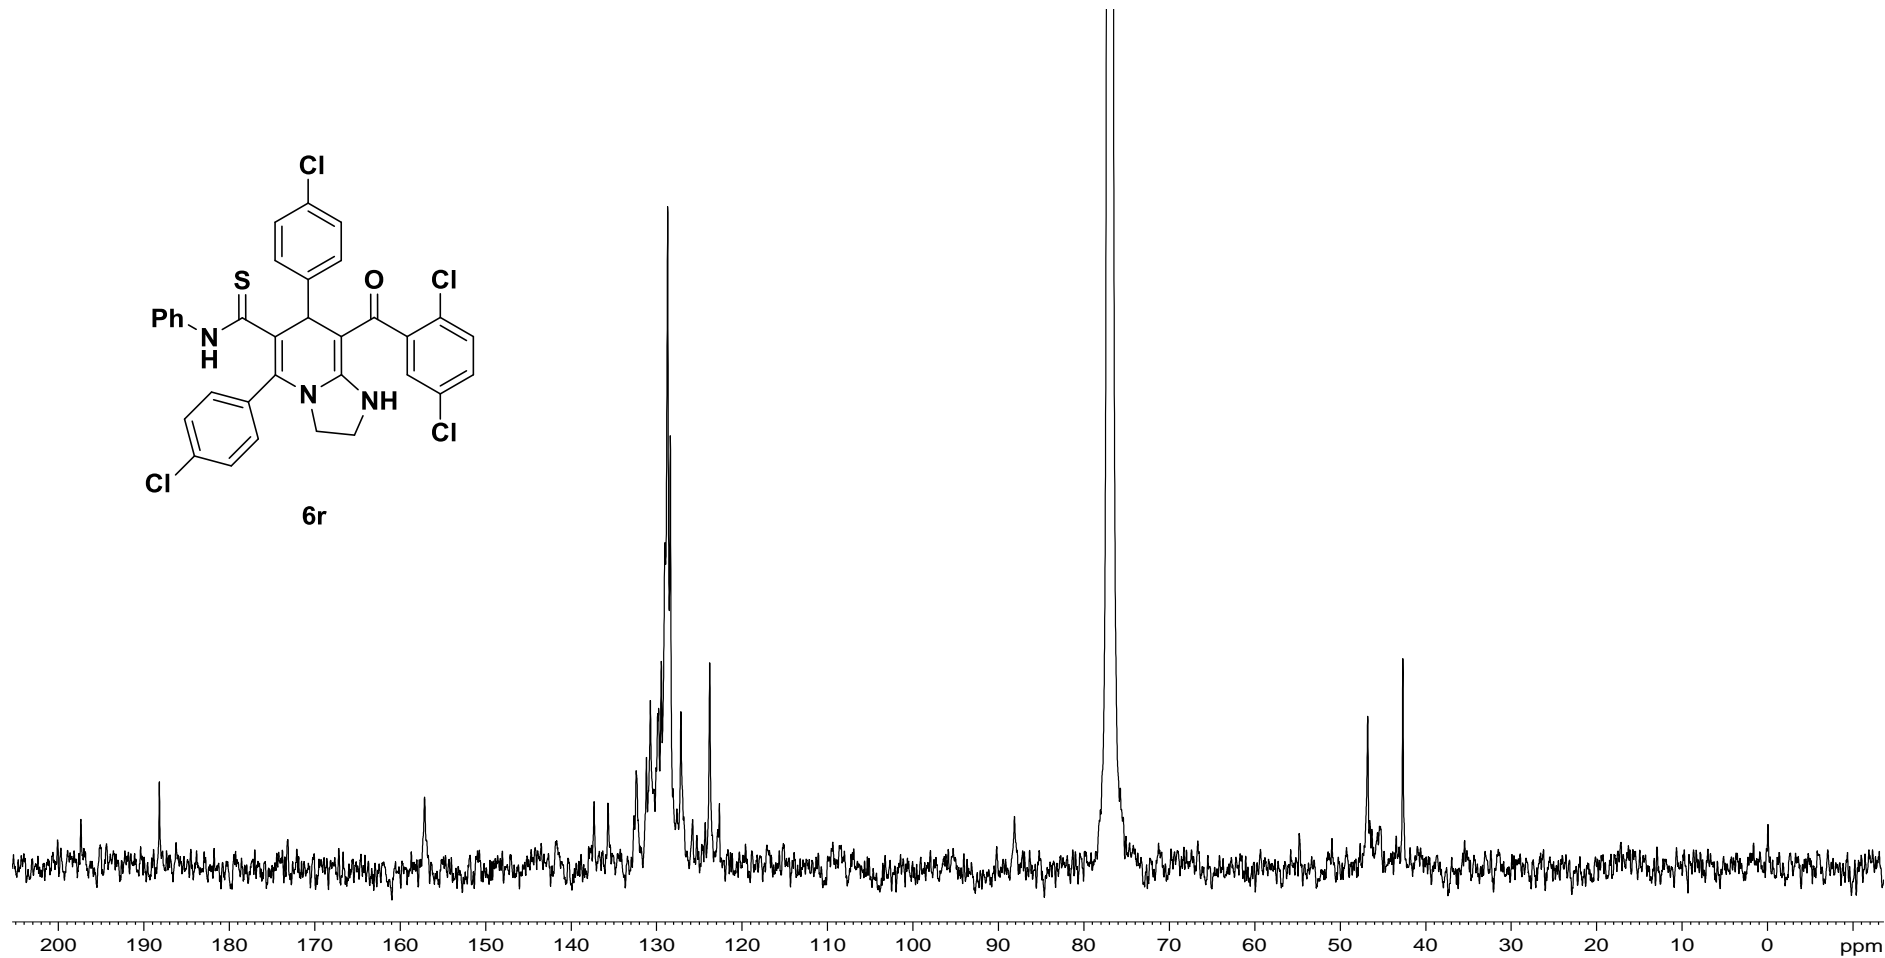

Supplement: c5ra13395e1.pdf [file c5ra13395e1.pdf]
